# Supplementary material
Source: PubMed Central journal article supplement (PMC6146984)

# Response of Hypogean Actinobacterial Genera Secondary Metabolism to Chemical and Biological Stimuli

Brett C. Covington<sup>a</sup>, Jeffrey M. Spraggins<sup>a,b,c</sup>, Audrey E. Yniguez-Gutierrez<sup>a</sup>, Zachary B. Hylton<sup>a</sup>, and Brian O. Bachmann<sup>a,b\*</sup>

<sup>a</sup>Department of Chemistry, Vanderbilt University, Nashville, Tennessee 37235, USA

<sup>b</sup>Department of Biochemistry, Vanderbilt University, Nashville, TN

<sup>c</sup>Mass Spectrometry Research Center, Vanderbilt University, Nashville, TN

## Table of Contents

### A. Metabolomic analysis of exposed actinobacterial cultures

1. Table of identified actinomycete genera isolated from hypogean samples
2. Metabolomics processing workflow
3. Stimuli responses across strains
4. Activation of natural products through stimuli conditions
5. Extracted ion chromatograms for identified NPs
6. UV spectra for identified and speculative natural products observed in screen
7. NMR Spectra for identified natural products

### B. funisamine analyses

1. NMR correlation table for funisamine
2. NMR spectroscopic data for funisamine
3. High-resolution mass spectral data
4. Fragmentation Data
5. Amicoumacin production in mixed culture
6. Mixed culture competitor growth rates

### C. Genome analysis of *Streptosporangium* sp. KDCAGE35

7. Putative NP gene clusters
8. Putative funisamine gene cluster
9. Ketoreductase domain stereochemical prediction analysis

## A. 1. Phylogenetic analyses

**Table S1:** Table of identified actinomycete genera isolated from hypogean samples.

| Genus List               | Number isolated |
|--------------------------|-----------------|
| <i>Streptomyces</i>      | 91              |
| <i>Micromonospora</i>    | 9               |
| <i>Pseudomonas</i>       | 6               |
| <i>Kribella</i>          | 5               |
| <i>Nocardioides</i>      | 5               |
| <i>Bacillus</i>          | 4               |
| <i>Micrococcus</i>       | 4               |
| <i>Microbispora</i>      | 3               |
| <i>Nonomuraea</i>        | 3               |
| <i>Rhodococcus</i>       | 3               |
| <i>Arthrobacter</i>      | 2               |
| <i>Flavobacterium</i>    | 2               |
| <i>Pseudoduganella</i>   | 2               |
| <i>Streptosporangium</i> | 2               |
| <i>Variovorax</i>        | 2               |
| <i>Agromyces</i>         | 1               |
| <i>Azobacter</i>         | 1               |
| <i>Catellatospora</i>    | 1               |
| <i>Dactylosporangium</i> | 1               |
| <i>Massilia</i>          | 1               |
| <i>Methylobacterium</i>  | 1               |
| <i>Nocardia</i>          | 1               |
| <i>Oerskovia</i>         | 1               |
| <i>Pseudonocardia</i>    | 1               |
| <i>Stenotrophomonas</i>  | 1               |
| <i>Williamsia</i>        | 1               |
| <i>Saccharothrix</i>     | 1               |

**Table S2:** Table of GenBank accession numbers for 16S sequences of selected cave isolates.

| <b>Isolate</b> | <b>Proposed genus</b>    | <b>GenBank accession no.</b> |
|----------------|--------------------------|------------------------------|
| BBHARD14       | <i>Kribbella</i>         | <a href="#">MH182596</a>     |
| BBHARD22       | <i>Micromonospora</i>    | <a href="#">MH182597</a>     |
| BBHARD23       | <i>Nonomuraea</i>        | <a href="#">MH182598</a>     |
| BBHARD27       | <i>Saccharothrix</i>     | <a href="#">MH182599</a>     |
| BBHARD28       | <i>Micromonospora</i>    | <a href="#">MH182600</a>     |
| BBHARD29       | <i>Micromonospora</i>    | <a href="#">MH182601</a>     |
| CGSNAI18       | <i>Nocardia</i>          | <a href="#">MH182602</a>     |
| BBSNAI08       | <i>Kribella</i>          | <a href="#">MH182603</a>     |
| BBSNAI19       | <i>Nocardioides</i>      | <a href="#">MH277690</a>     |
| BBSNAI23       | <i>Nocardioides</i>      | <a href="#">MH182604</a>     |
| BBSNAI36       | <i>Arthrobacter</i>      | <a href="#">MH182605</a>     |
| BCCAGE06       | <i>Streptomyces</i>      | <a href="#">MH182606</a>     |
| BCCAGE18       | <i>Streptomyces</i>      | <a href="#">MH182607</a>     |
| BCCAGE23       | <i>Micromonospora</i>    | <a href="#">MH182608</a>     |
| BCCAGE29       | <i>Streptomyces</i>      | <a href="#">MH182609</a>     |
| BCCAGE31       | <i>Streptomyces</i>      | <a href="#">MH182610</a>     |
| BCCAGE42       | <i>Nonomuraea</i>        | <a href="#">MH182611</a>     |
| BCCAGE45       | <i>Pseudonocardia</i>    | <a href="#">MH182612</a>     |
| BCCAGE54       | <i>Microbispora</i>      | <a href="#">MH182613</a>     |
| KDCAGE35       | <i>Streptosporangium</i> | <a href="#">MH182614</a>     |

## A. 2. Metabolomics processing workflow

### XCMS Processing

Thermo .raw files were converted to mzXML using ProteoWizard, and output files were placed into “control” and “test” folders for XCMS analysis. Control cultures were placed in the control, while all stimuli conditions, metal, antibiotic, and competitor exposed cultures were placed in the test folder. These two folders were placed inside another folder which was designated as the directory for XCMS processing in R.

The following commands were used in the XCMS processing and alignment:

- library(xcms)
- x<-xcmsSet()
- x<-group(x, mzwid=0.1, minfrac=0)
- x2<-retcor(x, family="s", plotype="m")
- x2<-group(x2, bw=60, mzwid=0.2, minfrac=0)
- x3<-fillPeaks(x2)
- reporttab<-diffreport(x3, "control", "test", 10, metlin=0.15)

### A. 3. Stimuli responses across strains

**FIG S1:** Venn diagrams show the distribution of features with at least 10-fold higher abundance in stimuli vs control conditions with a minimum feature value set to 0.01 % of the total ion count. Distribution shown as a percentage of the total number of features detected within that strain. The genus, based on the nearest 16S relative, is shown above, and the isolate ID is given in parenthesis. Sections  $\geq 5\%$  are colored red.

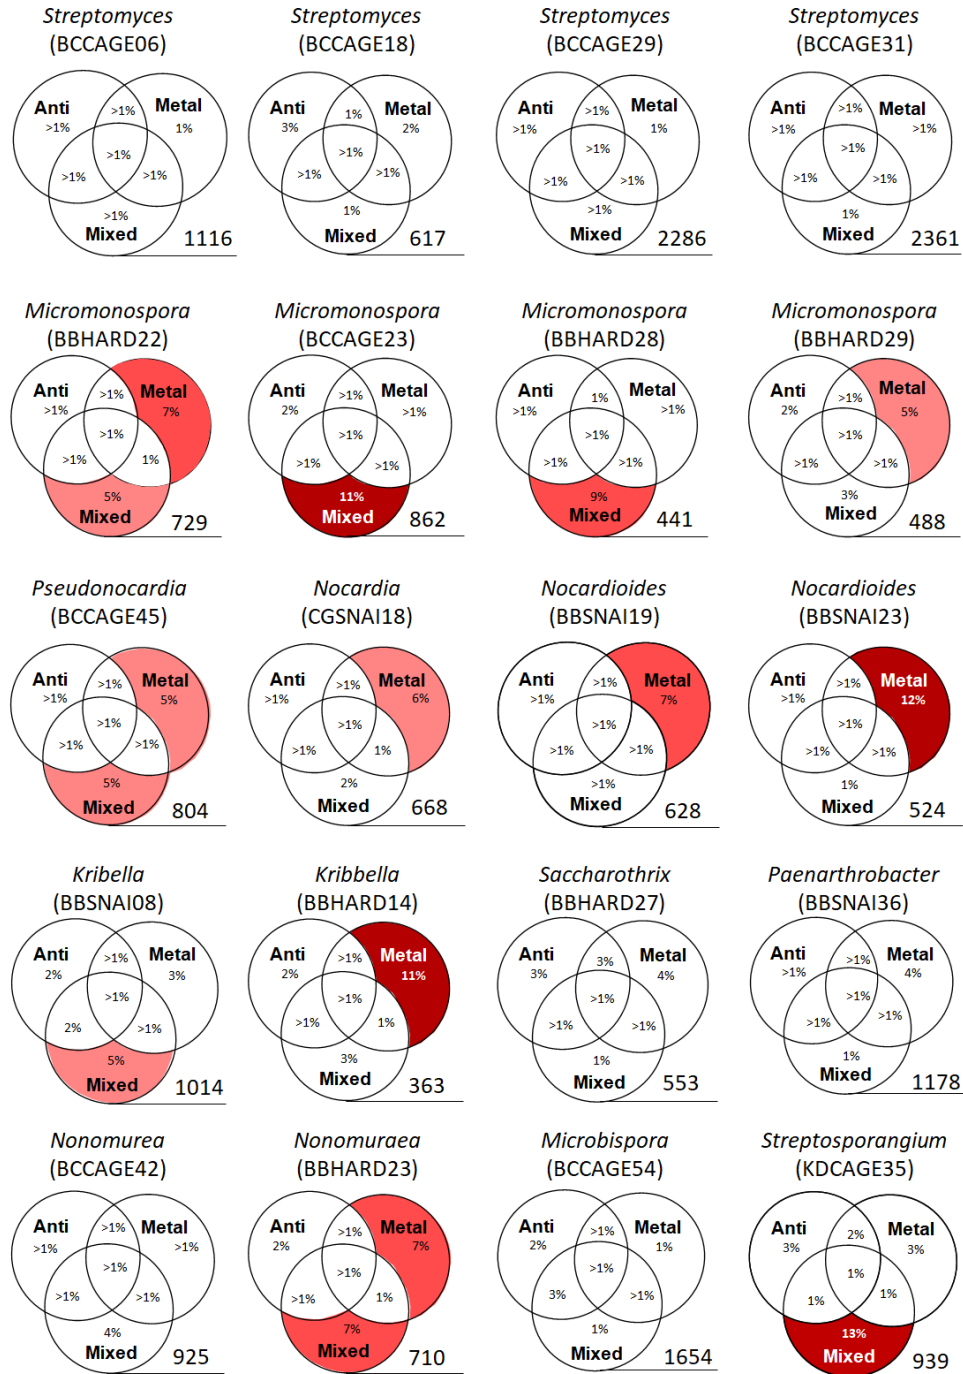

**FIG S2:** Stacked bar graph shows the percentage of detected features per strain with increased production of at least 10-fold in rifampicin (red), streptomycin (yellow), and both (gray) stimuli vs control conditions. Below each bar is shown the isolate identifier and the genus based on the nearest 16S rDNA relative.

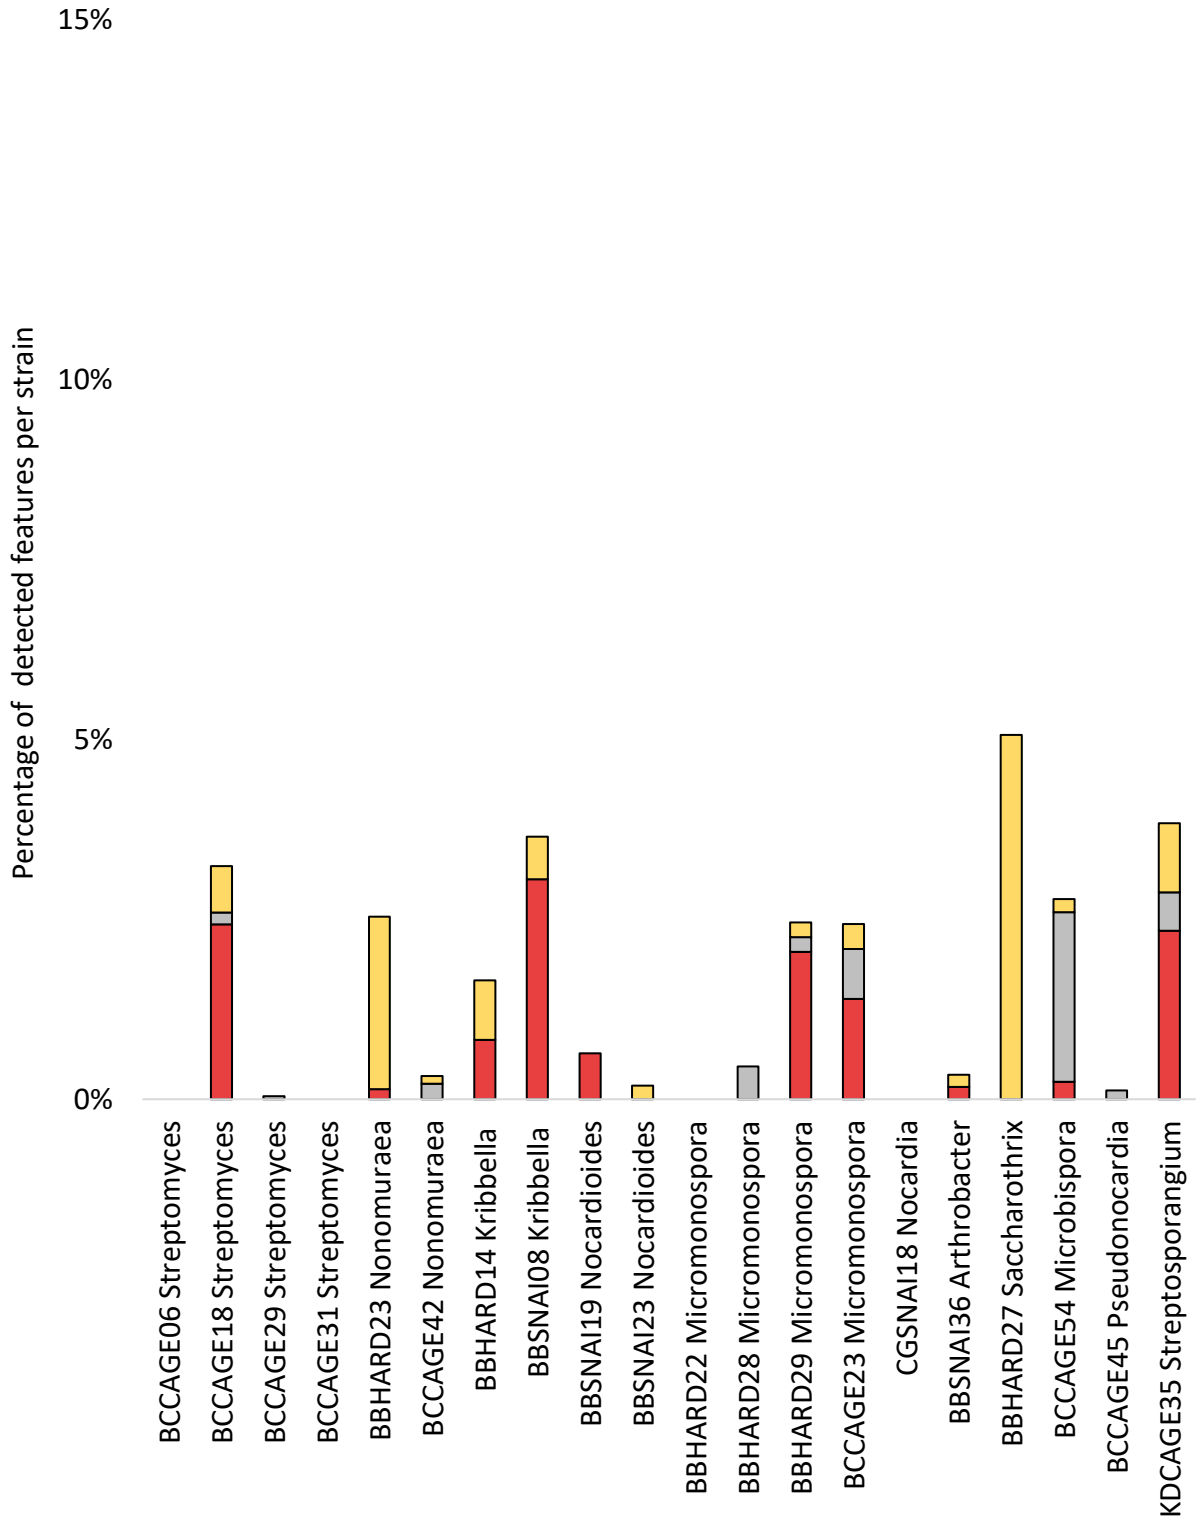

**FIG S3:** Stacked bar graph shows the percentage of detected features per strain with increased production of at least 10-fold in lanthanum (blue), scandium (black), and both (gray) stimuli vs control conditions. Below each bar is shown the isolate identifier and the genus based on the nearest 16S rDNA relative.

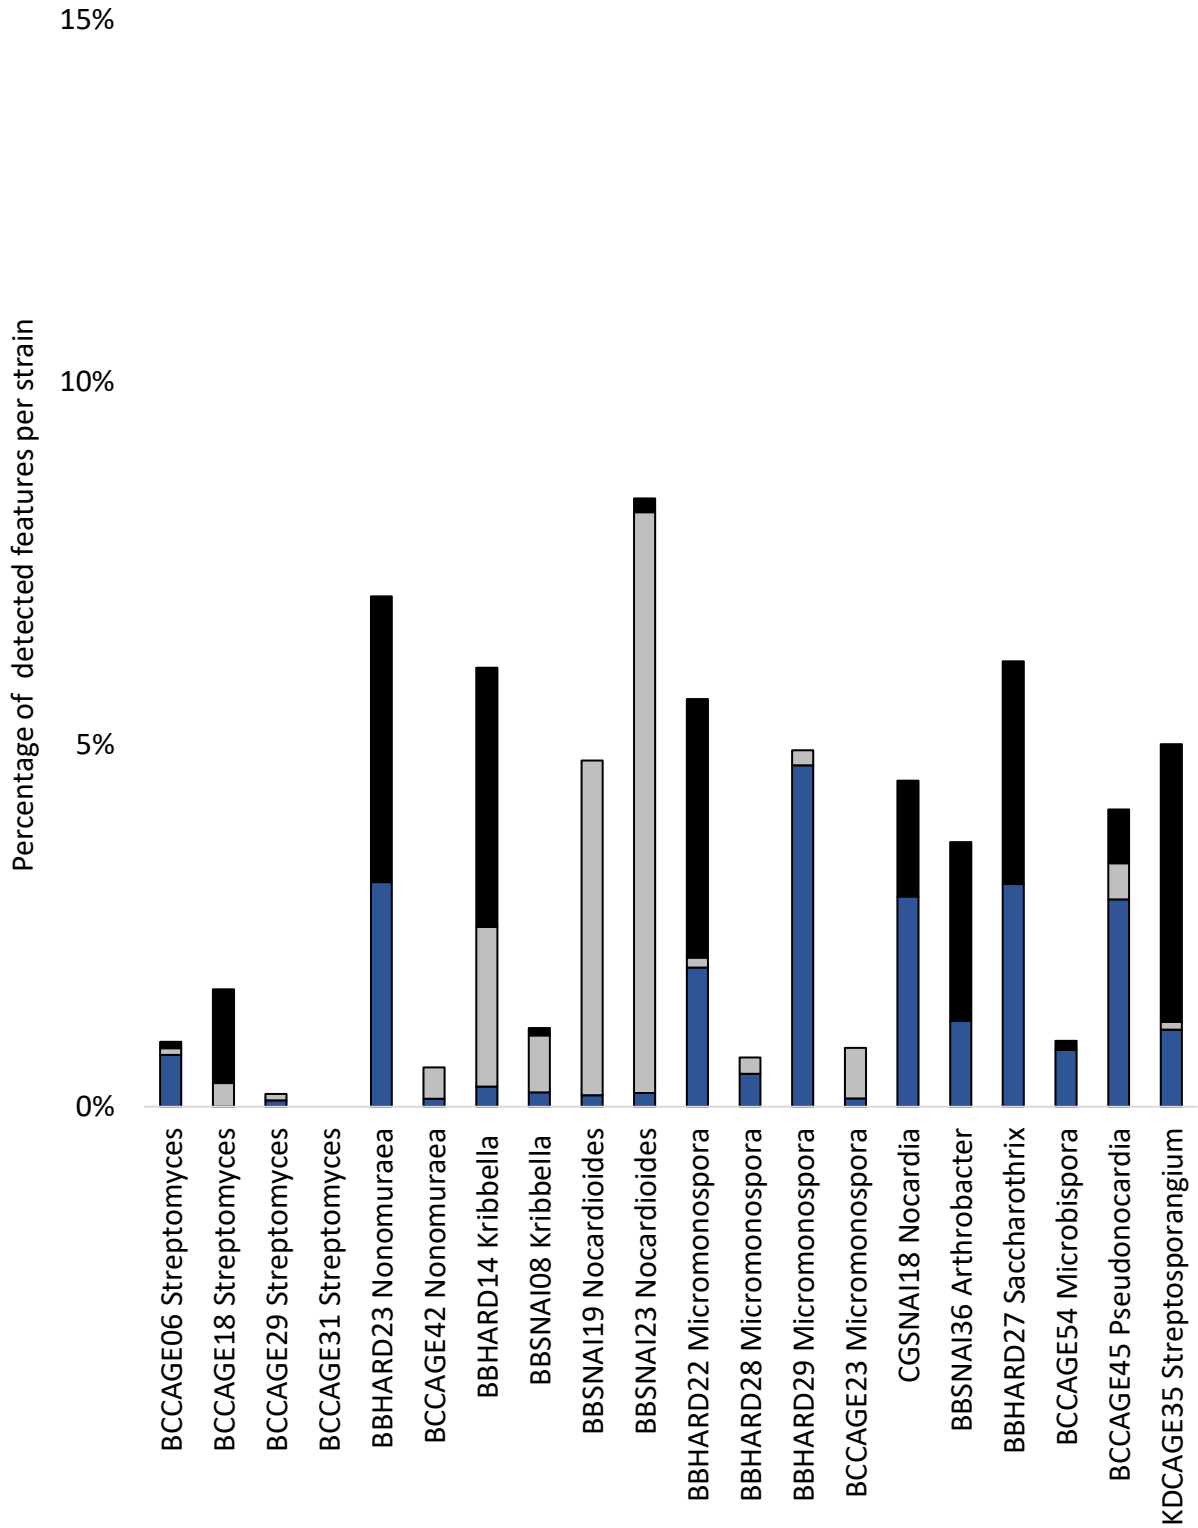

**FIG S4:** Stacked bar graph shows the percentage of detected features per strain with increased production of at least 10-fold in mixed culture with *Tsakumurella pulmonis* (orange), *Rhodococcus wratis* (green), and both (gray) stimuli vs control conditions. Below each bar is shown the isolate identifier and the genus based on the nearest 16S rDNA relative.

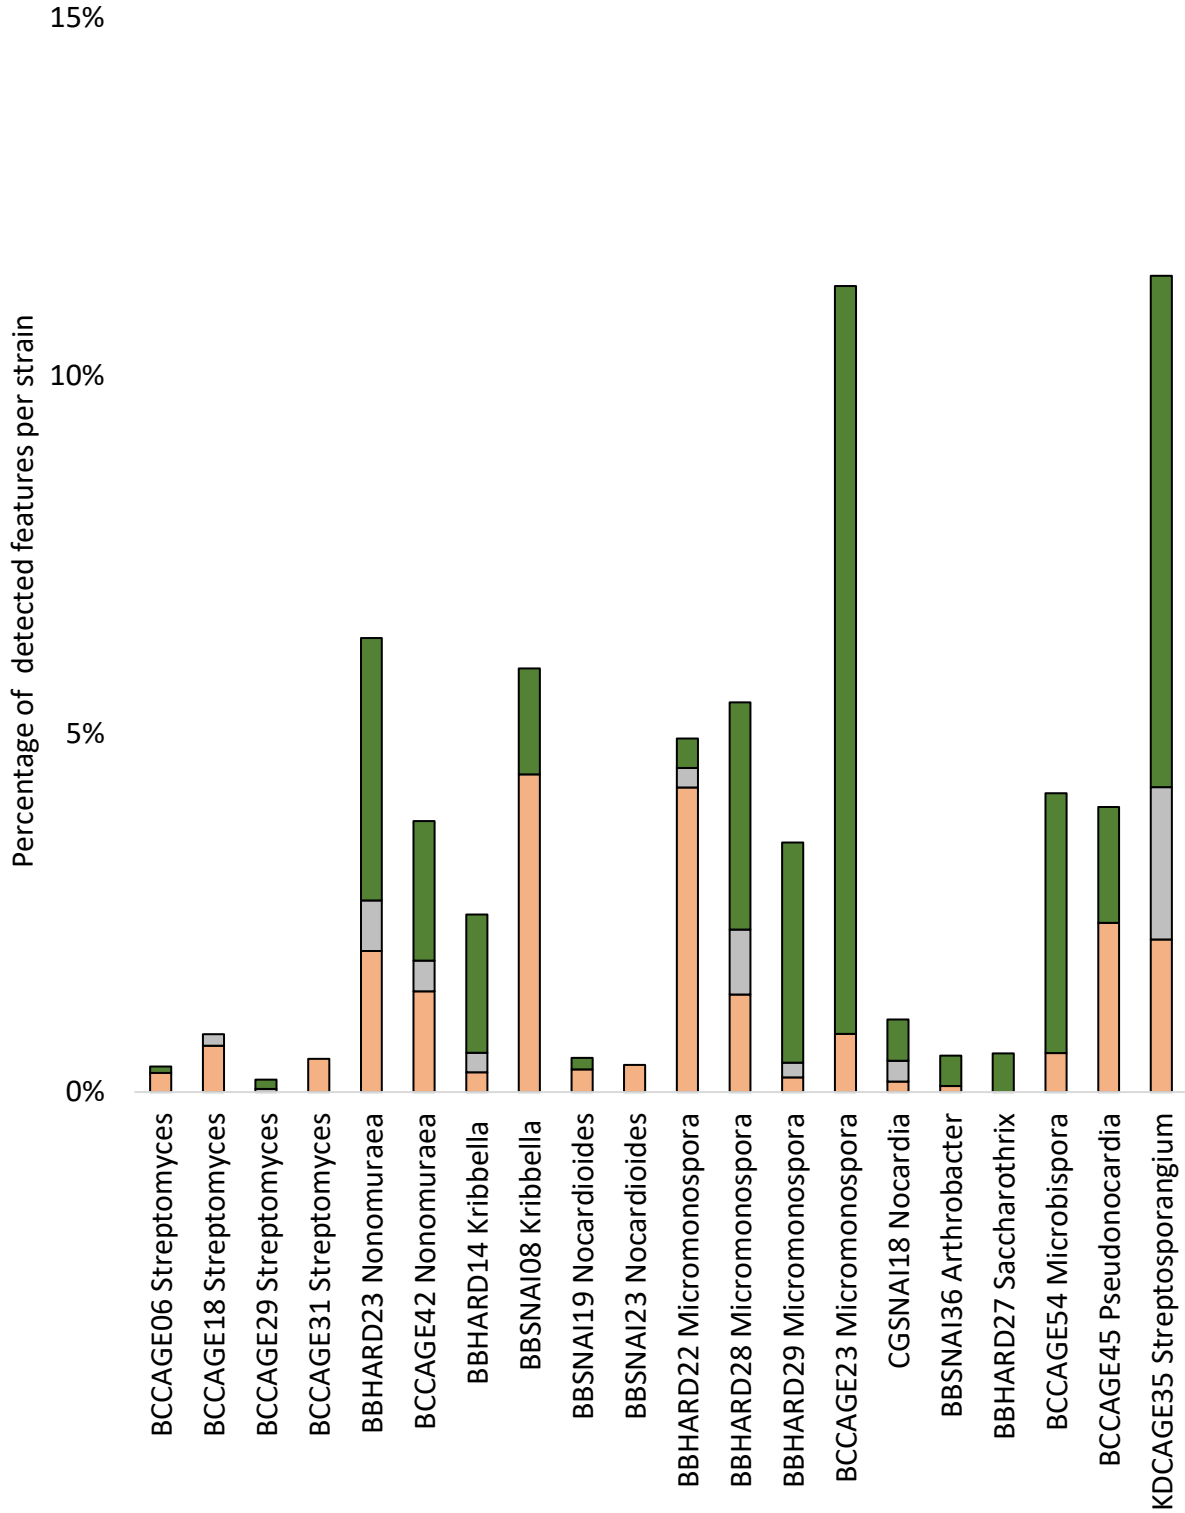



#### A. 4. Activation of natural products through stimuli conditions

**Table S3:** Table of identified natural product responses across stimuli conditions of subinhibitory concentrations of rifampicin (Rif) and streptomycin (Str), rare earth metal exposure of lanthanum (La) and scandium (Sc), and mixed culture conditions with *T. pulmonis* (TP) and *R. wratis* (RW). "Con" values represent averaged, manually integrated peak intensities for features in the control conditions. Values for stimuli columns represent fold change vs control calculated by dividing the integrated abundance for features of each stimuli condition by the Con value. The heatmap was colored using excels conditional formatting with fold change values of 0.1 set as red, 1 set as white, and 10 as green. Speculative ID provided in parenthesis under description when available.

| Strain (Isolate)                       | DESC         | ID               | Con   | Rif  | Str  | La  | Sc    | TP   | Rw   |
|----------------------------------------|--------------|------------------|-------|------|------|-----|-------|------|------|
| <i>Micromonospora</i><br>(BBHARD22)    | M257.7T17.2  | Okicenone        | 4E+06 | 1.3  | 0.7  | 0.8 | 6.0   | 1.1  | 2.1  |
|                                        | M253.6T24.6  | Aloesaponarin II | 2E+07 | 1.4  | 0.8  | 0.3 | 5.4   | 0.6  | 1.2  |
| <i>Nonomuraea</i><br>(BBHARD23)        | M785.1T21.5  | Hypogeamicin A   | 7E+05 | 0.5  | 0.2  | 0.0 | 2.3   | 1.1  | 2.8  |
|                                        | M376T21.1    | Hypogeamicin B   | 6E+05 | 1.4  | 0.4  | 0.2 | 110.2 | 10.2 | 2.0  |
|                                        | M394T15.8    | Hypogeamicin C   | 5E+06 | 1.4  | 3.5  | 0.0 | 6.2   | 5.8  | 5.2  |
| <i>Streptomyces</i><br>(BCCAGE06)      | M1269.6T25.4 | Actinomycin C2   | 2E+07 | 0.8  | 1.0  | 1.5 | 0.7   | 3.4  | 2.0  |
| <i>Microbispora</i><br>(BCCAGE54)      | M1056.4T14   | Propeptin 1      | 7E+05 | 3.2  | 1.3  | 0.1 | 0.7   | 1.9  | 2.9  |
|                                        | M1146.9T14.6 | Propeptin 2      | 2E+06 | 0.8  | 0.0  | 0.6 | 1.9   | 0.5  | 0.9  |
|                                        | M369.3T17    | Tetarimycin B    | 1E+06 | 16.1 | 32.8 | 0.5 | 6.2   | 0.4  | 23.0 |
| <i>Streptosporangium</i><br>(KDCAGE35) | M1178.3T15.6 | Funisamine       | 7E+03 | 4.3  | 6.4  | 1.3 | 1.4   | 31.2 | 1.4  |

**Table S4:** Table of putative natural product responses across stimuli conditions of subinhibitory concentrations of rifampicin (Rif) and streptomycin (Str), rare earth metal exposure of lanthanum (La) and scandium (Sc), and mixed culture conditions with *T. pulmonis* (TP) and *R. wratis* (RW). Features were assigned as putative natural products based on MS, and MS/MS changes in comparison to known compounds, UV spectrum, and response to stimuli. “Con” values represent averaged, manually integrated peak intensities for features in the control conditions. Values for stimuli columns represent fold change vs control calculated by dividing the integrated abundance for features of each stimuli condition by the Con value. The heatmap was colored using excels conditional formatting with fold change values of 0.1 set as red, 1 set as white, and 10 as green. Speculative ID provided in parenthesis under description when available.

| Strain                              | DESC         | Description ( <i>speculative ID</i> )                 | Con   | Rif  | Str | La  | Sc   | TP  | Rw    |
|-------------------------------------|--------------|-------------------------------------------------------|-------|------|-----|-----|------|-----|-------|
| <i>Micromonospora</i><br>(BBHARD22) | M256.8T9.9   | Unident. NP 1                                         | 3E+05 | 0.8  | 0.5 | 0.9 | 0.4  | 0.3 | 0.6   |
|                                     | M233.8T11.1  | Unident. NP 2                                         | 6E+06 | 2.4  | 1.0 | 0.4 | 2.4  | 0.9 | 2.5   |
|                                     | M283.6T13.1  | Unident. Anthraquinone 1                              | 3E+05 | 12.5 | 1.0 | 0.9 | 19.5 | 6.3 | 7.6   |
|                                     | M297.5T14.3  | Unident. Anthraquinone 2<br>(DMAC)                    | 4E+07 | 1.0  | 1.0 | 0.4 | 2.6  | 1.3 | 1.3   |
|                                     | M238.7T20.8  | Unident. Anthraquinone 3<br>(Dihydroxyanthraquinone)  | 4E+05 | 0.6  | 0.6 | 3.4 | 41.7 | 0.1 | 0.3   |
|                                     | M241.7T22    | Unident. Anthraquinone 4                              | 6E+05 | 2.9  | 0.8 | 0.5 | 6.8  | 1.9 | 4.0   |
|                                     | M269.6T25.4  | Unident. Anthraquinone 5<br>(Hydroxyaloesaponarin II) | 4E+06 | 1.5  | 0.6 | 0.2 | 9.0  | 0.1 | 1.5   |
| <i>Nonomuraea</i><br>(BBHARD23)     | M605.1T14.7  | Unident. Hygogeamicin 1                               | 3E+06 | 0.8  | 0.3 | 0.0 | 0.5  | 0.3 | 1.9   |
|                                     | M410T15.1    | Unident. Hygogeamicin 2                               | 1E+06 | 0.4  | 0.6 | 0.0 | 0.0  | 0.7 | 3.9   |
|                                     | M833.2T21    | Unident. Hygogeamicin 3                               | 3E+04 | 0.9  | 1.4 | 0.2 | 1.0  | 8.1 | 590.3 |
|                                     | M818.1T21.2  | Unident. Hygogeamicin 4                               | 1E+06 | 1.4  | 5.1 | 0.0 | 1.3  | 4.7 | 3.5   |
| <i>Streptomyces</i><br>(BCCAGE06)   | M1271.6T22.6 | Unident. Actinomycin 1 (Y5)                           | 5E+06 | 0.8  | 0.3 | 1.1 | 0.6  | 3.6 | 2.7   |
|                                     | M1287.5T25.4 | Unident. Actinomycin 2 (Y3)                           | 5E+05 | 0.3  | 0.3 | 1.5 | 0.4  | 2.3 | 11.9  |
|                                     | M1293.6T25.4 | Unident. Actinomycin 3 (G2)                           | 5E+05 | 4.0  | 1.6 | 3.7 | 3.2  | 4.6 | 4.4   |
|                                     | M1257.7T25.4 | Unident. Actinomycin 4 (F4)                           | 9E+05 | 8.6  | 1.5 | 1.0 | 3.4  | 9.4 | 1.8   |

| Strain                                        | DESC         | Description ( <i>speculative ID</i> )     | Con   | Rif   | Str   | La  | Sc  | TP   | Rw    |
|-----------------------------------------------|--------------|-------------------------------------------|-------|-------|-------|-----|-----|------|-------|
| <i>Streptomyces</i><br>(BCCAGE06)             | M1307.5T25.4 | Unident. Actinomycin 5 (Y2)               | 1E+06 | 0.3   | 1.3   | 0.7 | 0.7 | 3.3  | 3.8   |
|                                               | M1255.6T25.4 | Unident. Actinomycin 6 (D)                | 7E+06 | 5.4   | 0.8   | 0.8 | 2.7 | 5.2  | 2.5   |
|                                               | M1327.7T25.4 | Unident. Actinomycin 7                    | 4E+05 | 1.7   | 1.3   | 2.5 | 1.1 | 11.1 | 5.0   |
|                                               | M1313.6T25.4 | Unident. Actinomycin 8                    | 1E+05 | 29.4  | 3.9   | 2.9 | 7.4 | 28.7 | 15.1  |
| <i>Streptomyces glauciniger</i><br>(BCCAGE31) | M311.4T8.3   | Unident. NP 3                             | 2E+07 | 0.3   | 0.7   | 1.2 | 0.6 | 1.1  | 1.0   |
|                                               | M287.5T9.5   | Unident. NP 4                             | 2E+07 | 0.8   | 1.1   | 1.2 | 0.7 | 0.3  | 0.0   |
|                                               | M634.9T12.5  | Unident. NP 5                             | 3E+06 | 0.1   | 0.5   | 0.9 | 0.3 | 1.0  | 0.5   |
|                                               | M295.5T12.9  | Unident. NP 6                             | 4E+06 | 1.2   | 1.0   | 1.4 | 0.5 | 1.3  | 1.0   |
|                                               | M707.1T16.2  | Unident. NP 7                             | 1E+05 | 0.9   | 0.7   | 0.7 | 0.4 | 0.0  | 0.5   |
|                                               | M311.4T16.6  | Unident. NP 8                             | 6E+06 | 0.8   | 0.8   | 1.2 | 0.6 | 1.5  | 0.9   |
|                                               | M253.6T26.3  | Unident. NP 9 ( <i>Aloesaponarin II</i> ) | 3E+06 | 1.1   | 0.4   | 1.3 | 0.2 | 0.3  | 0.3   |
| <i>Nonomuraea</i><br>(BCCAGE42)               | M411.4T12    | Unident. NP 10                            | 5E+05 | 3.5   | 0.8   | 0.1 | 0.6 | 0.0  | 0.0   |
|                                               | M628.1T12.7  | Unident. Polyene 1                        | 1E+05 | 14.5  | 0.1   | 1.5 | 0.6 | 0.0  | 0.2   |
|                                               | M628.1T13.3  | Unident. Polyene 2                        | 2E+04 | 49.9  | 0.6   | 3.8 | 1.6 | 0.1  | 0.0   |
|                                               | 548.3T15.4   | Unident. Polyene 3                        | 6E+03 | 140.6 | 0.0   | 4.6 | 2.6 | 4.0  | 2.9   |
|                                               | 548.3T16.2   | Unident. Polyene 4                        | 1E+04 | 80.9  | 0.0   | 1.1 | 1.0 | 1.0  | 1.7   |
| <i>Streptomyces</i><br>(BCCAGE18)             | M900.2T17.1  | Unident. NP. 11                           | 1E+06 | 1.9   | 0.7   | 0.7 | 1.4 | 0.3  | 0.3   |
|                                               | M895.2T17.9  | Unident. NP. 12                           | 6E+06 | 2.7   | 0.7   | 1.1 | 2.2 | 1.0  | 0.9   |
| <i>Saccharothrix</i><br>(BBHARD27)            | M398.4T13.5  | Unident. NP. 13                           | 1E+07 | 1.3   | 0.0   | 0.0 | 1.9 | 0.8  | 1.1   |
|                                               | M247.8T15.2  | Unident. NP. 14                           | 1E+07 | 1.1   | 0.0   | 0.1 | 1.0 | 0.6  | 1.0   |
|                                               | M365.6T24.5  | Unident. NP. 15                           | 2E+07 | 1.0   | 0.0   | 0.0 | 1.1 | 0.7  | 1.6   |
| <i>Kribella</i><br>(BBSNAI08)                 | M732.4T20    | Unident. Polyene 5                        | 2E+07 | 0.2   | 0.9   | 0.0 | 0.0 | 0.4  | 0.0   |
| <i>Microbispora</i><br>(BCCAGE54)             | M689.2T10.5  | Unident. NP. 16                           | 1E+05 | 80.5  | 79.4  | 0.2 | 1.1 | 0.6  | 48.8  |
|                                               | M561.1T10.7  | Unident. NP. 17                           | 1E+06 | 17.0  | 21.1  | 0.5 | 0.5 | 0.6  | 52.9  |
|                                               | M575.2T11.5  | Unident. NP. 18                           | 4E+05 | 120.1 | 142.2 | 0.2 | 0.8 | 1.0  | 268.0 |

| Strain                            | DESC        | Description ( <i>speculative ID</i> )    | Con   | Rif  | Str  | La  | Sc   | TP  | Rw   |
|-----------------------------------|-------------|------------------------------------------|-------|------|------|-----|------|-----|------|
| <i>Microbispora</i><br>(BCCAGE54) | M717.2T11.6 | Unident. NP. 19                          | 5E+05 | 16.4 | 26.4 | 0.0 | 0.6  | 0.3 | 15.6 |
|                                   | M731.3T12.1 | Unident. NP. 20                          | 6E+05 | 13.9 | 27.5 | 0.1 | 0.6  | 0.0 | 14.9 |
|                                   | M355.4T13   | Unident. NP. 21 ( <i>Arromycin</i> )     | 8E+04 | 25.6 | 52.5 | 0.0 | 1.0  | 2.2 | 38.8 |
|                                   | M393.2T13.7 | Unident. NP. 22 ( <i>Linfuranone A</i> ) | 6E+05 | 4.8  | 6.0  | 0.2 | 0.4  | 0.0 | 4.7  |
|                                   | M385.2T14.7 | Unident. Tetarimycin 1                   | 3E+04 | 72.3 | 98.0 | 1.3 | 15.8 | 3.9 | 80.7 |
|                                   | M399.2T16.1 | Unident. Tetarimycin 2                   | 2E+05 | 23.0 | 39.5 | 0.5 | 4.4  | 0.7 | 20.2 |
|                                   | M406.3T17.5 | Unident. Tetarimycin 3                   | 2E+04 | 8.8  | 92.5 | 0.0 | 3.5  | 2.4 | 19.6 |
|                                   | M395.2T19.5 | Unident. Tetarimycin 4                   | 3E+04 | 53.9 | 49.0 | 0.8 | 3.1  | 1.0 | 49.8 |

**FIG S5:** Distribution of isolated and putative natural products from Tables S2-3 with  $\geq 10$ -fold changes in antibiotic exposure (anti), metal exposure (metal), or mixed culture (mixed) stimuli conditions relative to the control.

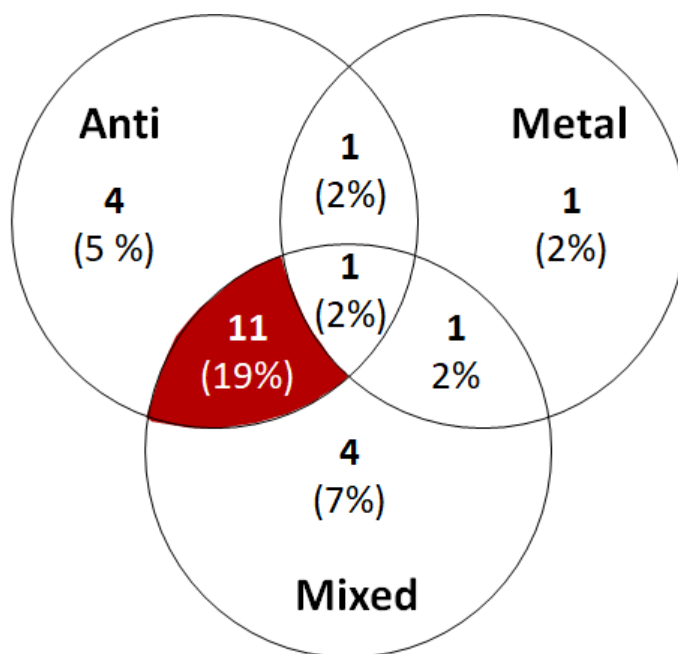

**FIG S6:** Analysis of volcano plot-prioritized features with chromatogram overlays. (A) Binary volcano plot comparison between *Microbispora* BCCAGE54 control and streptomycin antibiotic exposure conditions. Features below 0.8 significance 5-fold change thresholds colored grey. Features over thresholds colored by retention time brackets: <10 min (purple), between 10-15 min (yellow), and >15 min (green). (B) Volcano plot of features above thresholds and eluting before 10 min. (C) Volcano plot of features above thresholds and eluting between 10 and 15 min. (D) Volcano plot of features above thresholds and eluting after 15 min. Overlays of extracted ion, total ion, and UV/Vis chromatograms for features eluting after 15 min are shown in (E) for streptomycin exposed and (F) control *Microbispora* BCCAGE54 extracts. Red arrows highlight tetarimycin B peak in the EICs and PDA.

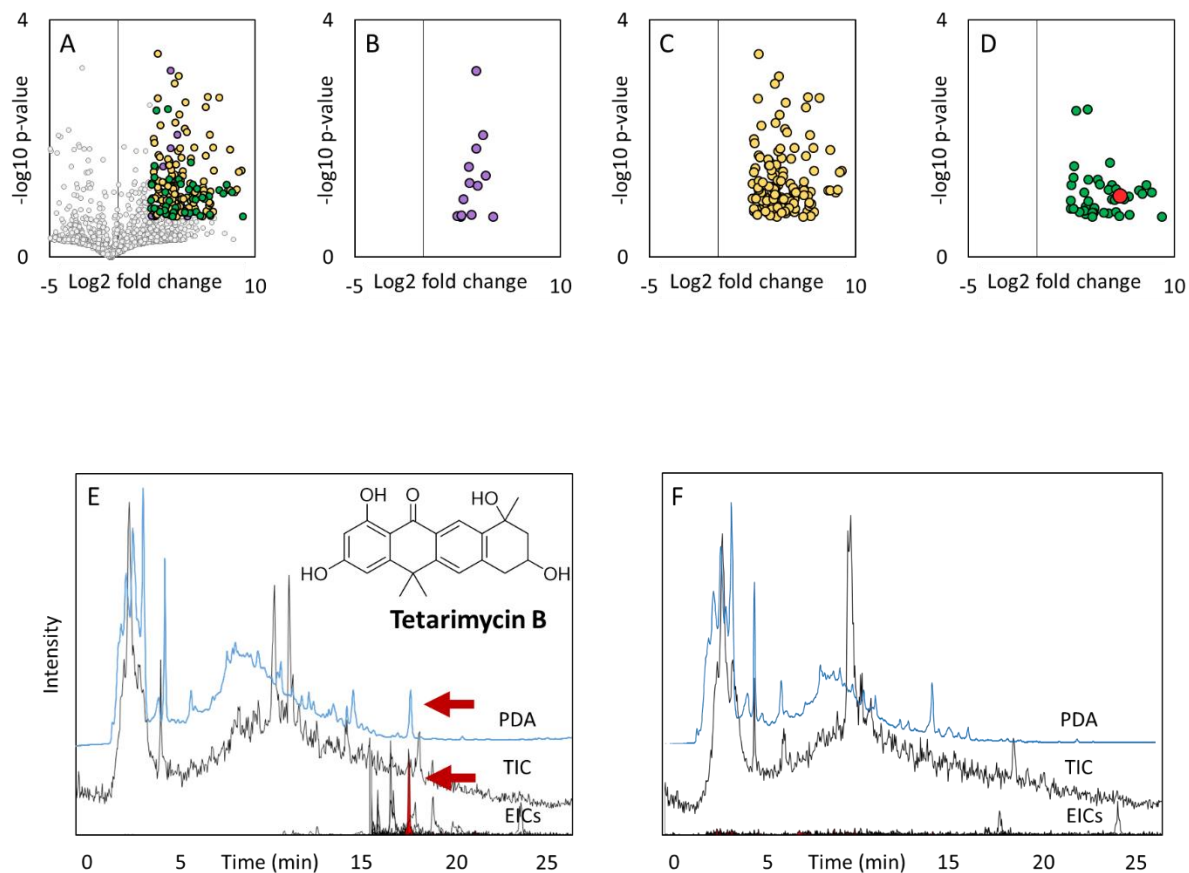

### A. 5. Extracted ion chromatograms (EICs) for selected features

The following are extracted ion chromatograms from the raw data for identified natural products shown in Table S1.

**FIG S7:** EICs of (A) okicenone and (C) aloesaponarin II from control (black) and Sc treated (red) *Micromonospora* BBHARD22 extracts and mass spectral data for (B) okicenone and (D) aloesaponarin II. Structures shown on right.

| Strain (Isolate)                    | DESC        | ID               | Con   | Rif | Str | La  | Sc  | TP  | Rw  |
|-------------------------------------|-------------|------------------|-------|-----|-----|-----|-----|-----|-----|
| <i>Micromonospora</i><br>(BBHARD22) | M257.7T17.2 | okicenone        | 4E+06 | 1.3 | 0.7 | 0.8 | 6.0 | 1.1 | 2.1 |
|                                     | M253.6T24.6 | aloesaponarin II | 2E+07 | 1.4 | 0.8 | 0.3 | 5.4 | 0.6 | 1.2 |

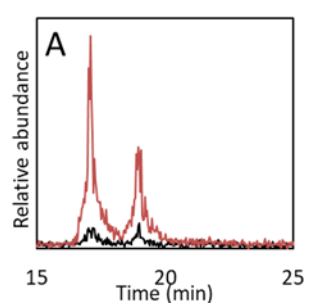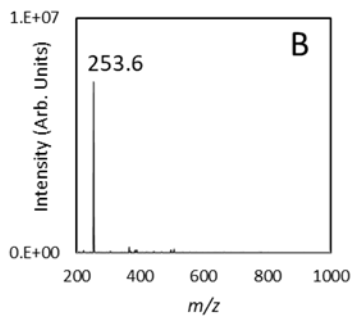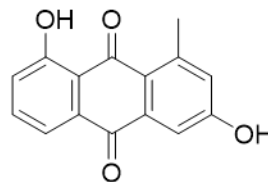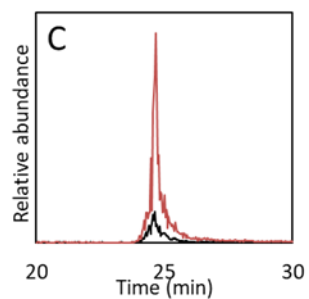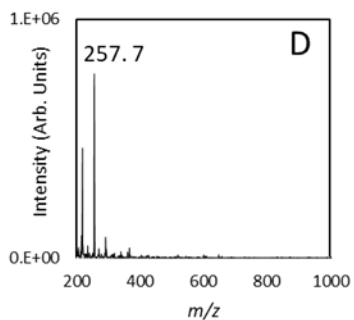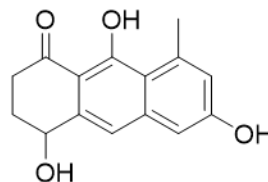

**FIG S8:** EICs of (A) hypogeamicin A, (C) hypogeamicin B, and (E) hypogeamicin C from control (black) and Sc treated (red) *Nonomuraea* BBHARD23 extracts and mass spectral data for (B) hypogeamicin A, (D) hypogeamicin B, and (F) hypogeamicin C. Structures shown on right.

| Strain (Isolate)                | DESC        | ID             | Con   | Rif | Str | La  | Sc    | TP   | Rw  |
|---------------------------------|-------------|----------------|-------|-----|-----|-----|-------|------|-----|
| <i>Nonomuraea</i><br>(BBHARD23) | M785.1T21.5 | hypogeamicin A | 7E+05 | 0.5 | 0.2 | 0.0 | 2.3   | 1.1  | 2.8 |
|                                 | M376T21.1   | hypogeamicin B | 6E+05 | 1.4 | 0.4 | 0.2 | 110.2 | 10.2 | 2.0 |
|                                 | M394T15.8   | hypogeamicin C | 5E+06 | 1.4 | 3.5 | 0.0 | 6.2   | 5.8  | 5.2 |

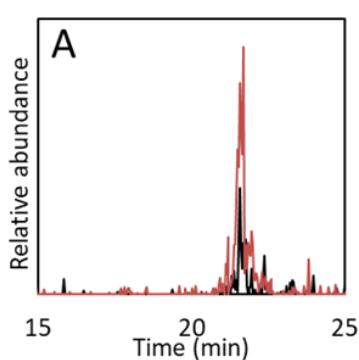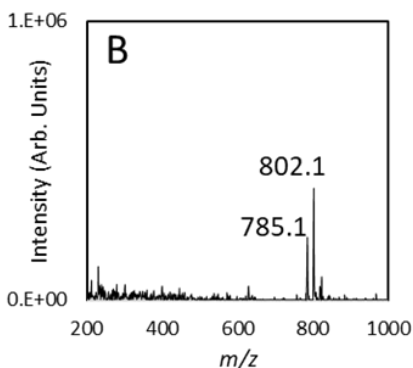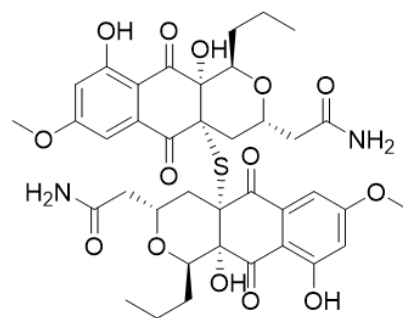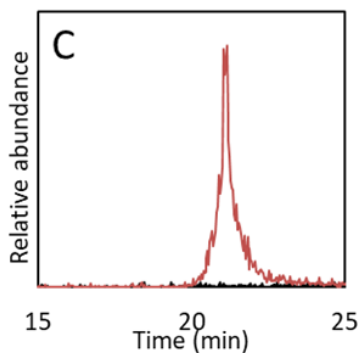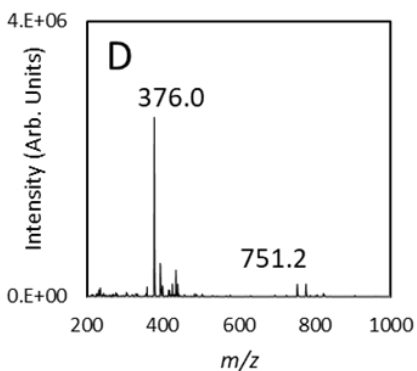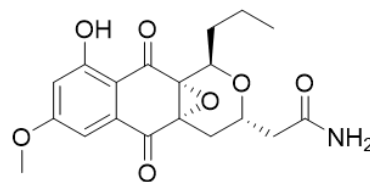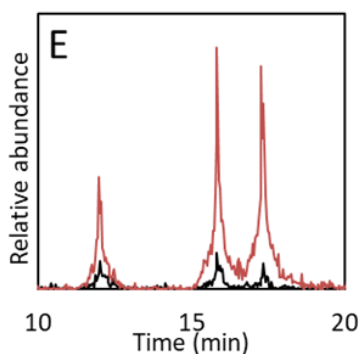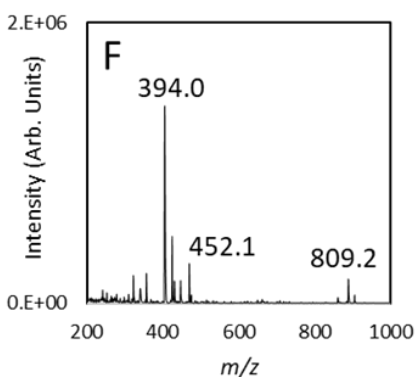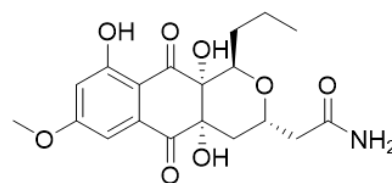

**FIG S9:** EICs of (A) actinomycin C2 from control (black) and TP treated (red) *Streptomyces* BCCAGE06 extracts and mass spectral data for (B) actinomycin C2. The structure of actinomycin C2 is shown below.

| Strain (Isolate)               | DESC         | ID             | Con   | Rif | Str | La  | Sc  | TP  | Rw  |
|--------------------------------|--------------|----------------|-------|-----|-----|-----|-----|-----|-----|
| <i>Streptomyces</i> (BCCAGE06) | M1269.6T25.4 | actinomycin C2 | 2E+07 | 0.8 | 1.0 | 1.5 | 0.7 | 3.4 | 2.0 |

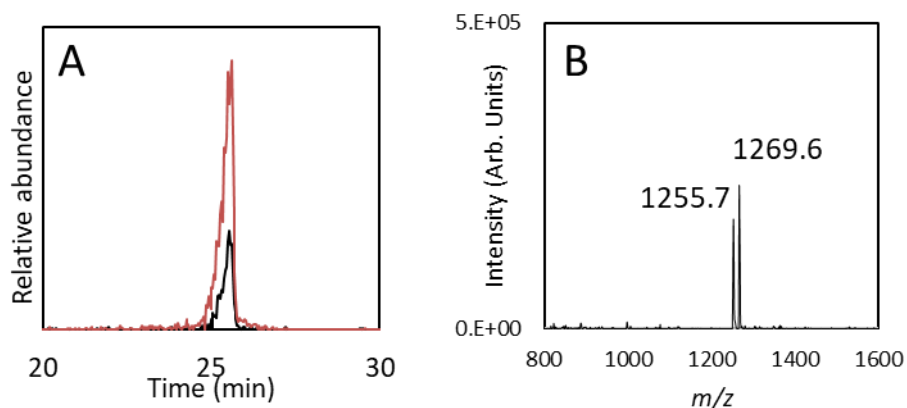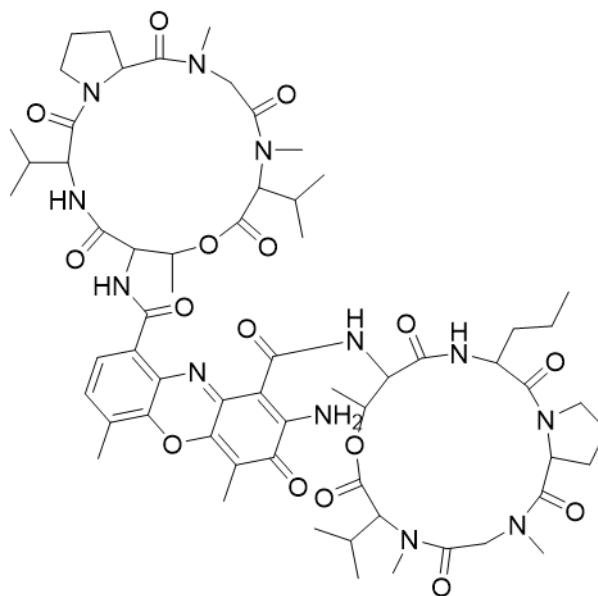



**FIG S10:** EICs of (A) propeptin 1, (C) propeptin 2, and (D) tetarimycin B from control (black) and Rif (a), La (b), and Str (c) treated (red) *Microbispora* BCCAGE54 extracts and mass spectral data for (B) propeptin 1, (D) propeptin 2, and (F) tetarimycin B. Structures shown on right.

| Strain (Isolate)                  | DESC         | ID            | Con   | Rif  | Str  | La  | Sc  | TP  | Rw   |
|-----------------------------------|--------------|---------------|-------|------|------|-----|-----|-----|------|
| <i>Microbispora</i><br>(BCCAGE54) | M1056.4T14   | propeptin 1   | 7E+05 | 3.2  | 1.3  | 0.1 | 0.7 | 1.9 | 2.9  |
|                                   | M1146.9T14.6 | propeptin 2   | 5E+05 | 0.6  | 0.0  | 2.0 | 1.5 | 0.5 | 0.7  |
|                                   | M369.3T17    | tetarimycin B | 1E+06 | 16.1 | 32.8 | 0.5 | 6.2 | 0.4 | 23.0 |

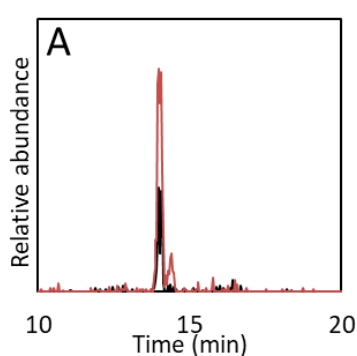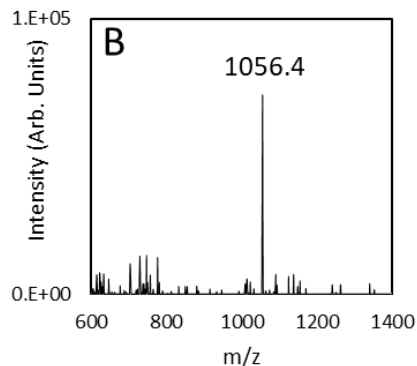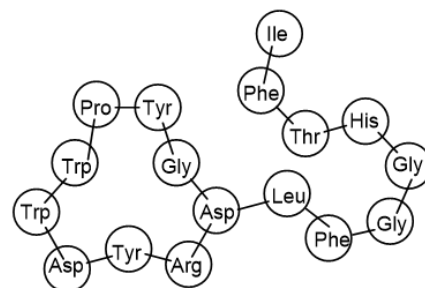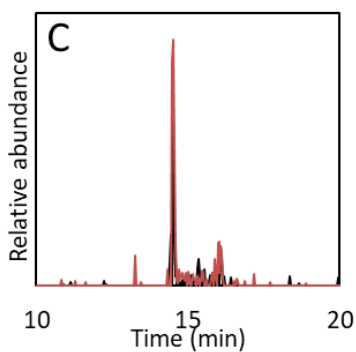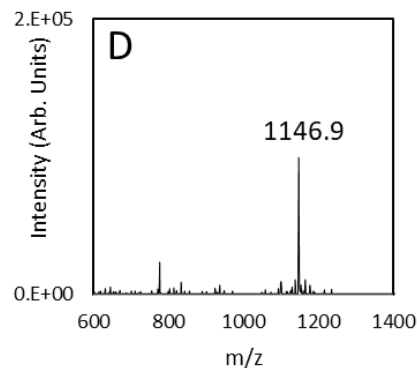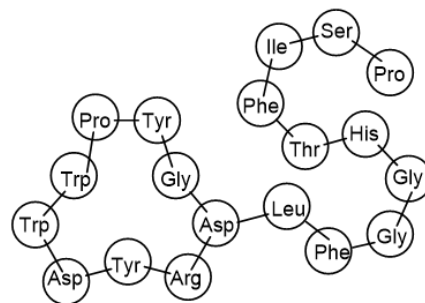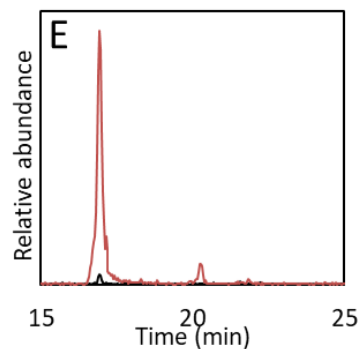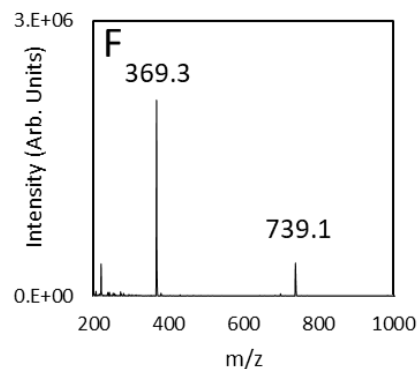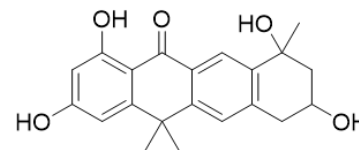

**FIG S11:** EICs of (A) funisamine from control (black) and TP treated (red) *Streptosporangium* KDCAGE35 extracts and mass spectral data for (B) funisamine. The structure of funisamine is shown below.

| Strain (Isolate)                    | DESC         | ID         | Con   | Rif | Str | La  | Sc  | TP   | Rw  |
|-------------------------------------|--------------|------------|-------|-----|-----|-----|-----|------|-----|
| <i>Streptosporangium</i> (KDCAGE35) | M1178.3T15.6 | funisamine | 7E+03 | 4.3 | 6.4 | 1.3 | 1.4 | 31.2 | 1.4 |

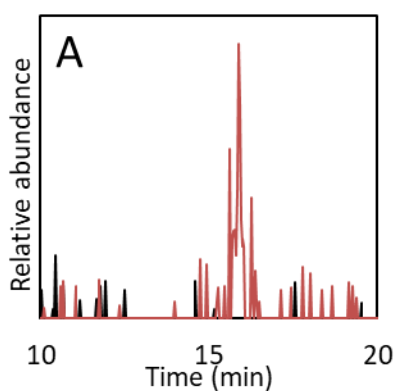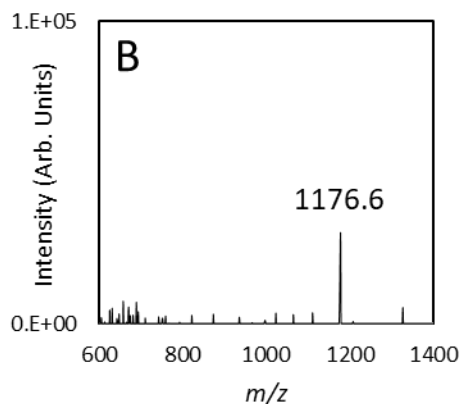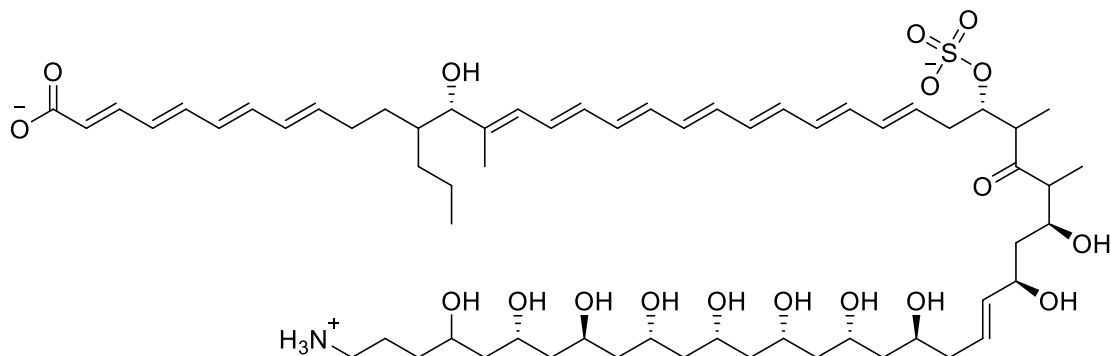

**FIG S12:** Mass spectral data for (A) unident. NP 1 (M256.8T9.9), (B) unident. NP 2 (M233.8T11.1), (C) unident. anthraquinone 1 (M283.6T13.1), (D) unident. anthraquinone 2 (M297.5T14.3, *DMAC*), (E) okicenone (M257.7T17.2), (F) unident. anthraquinone 3 (M238.7T20.8, *dihydroxyanthraquinone*), (G) unident. anthraquinone 4 (M241.7T22), (H) aloesaponarin II (M253.6T24.6), and (I) unident. anthraquinone 5 (M269.6T25.4, *Hydroxyaloesaponarin II*) in *Micromonospora* BBHARD22

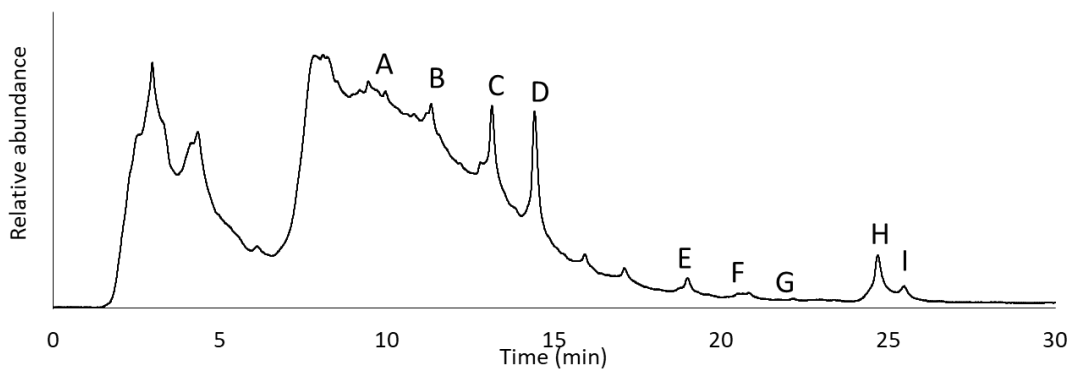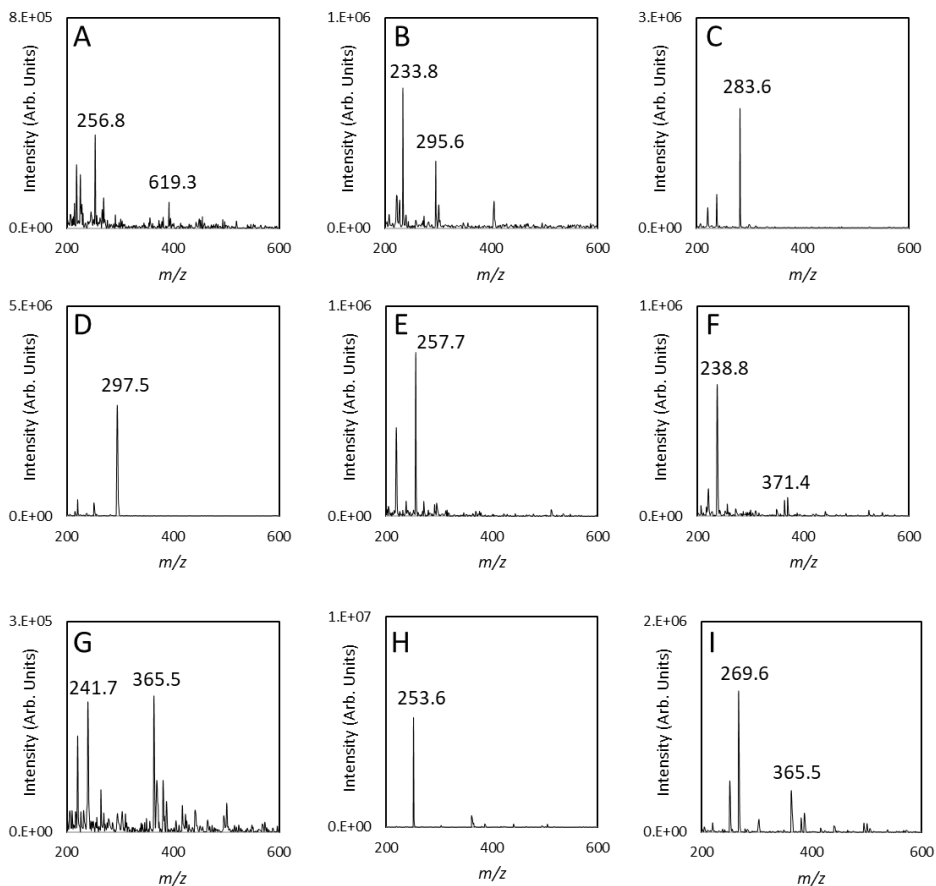

## A. 6. UV spectrum for natural products listed in Tables S1 and S2

**FIG S13:** UV spectrum of (A) unident. NP 1 (M256.8T9.9), (B) unident. NP 2 (M233.8T11.1), (C) unident. anthraquinone 1 (M283.6T13.1), (D) unident. anthraquinone 2 (M297.5T14.3, *DMAC*), (E) okicenone (M257.7T17.2), (F) unident. anthraquinone 3 (M238.7T20.8, *dihydroxyanthraquinone*), (G) unident. anthraquinone 4 (M241.7T22), (H) aloesaponarin II (M253.6T24.6), and (I) unident. anthraquinone 5 (M269.6T25.4, *Hydroxyaloesaponarin II*) in *Micromonospora* BBHARD22

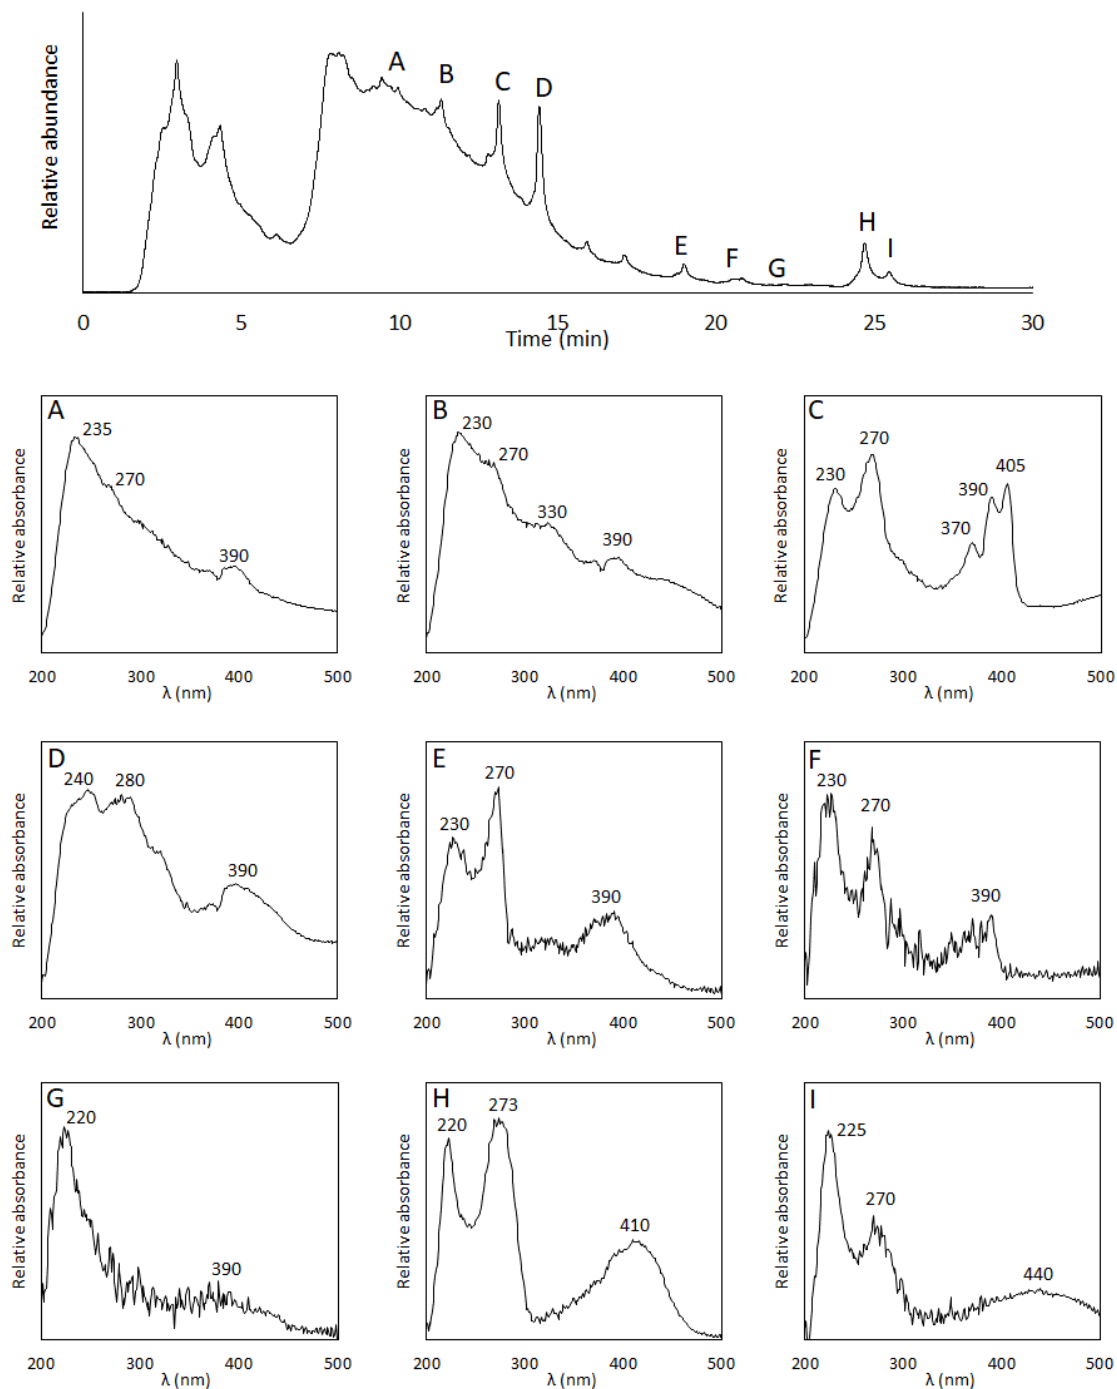

**FIG S14:** UV spectrum of (A) unident. hypogeamicin 4 (M605.1T14.7), (B) unident. hypogeamicin 3 (M410T15.1) in *Nonomuraea* (BBHARD23) unident. hypogeamicin 3 (M809.1T15.8), (C) hypogeamicin C (M394T15.8), (D) hypogeamicin B (M376T21.1), (E) unident. hypogeamicin 1 (M833.2T21), (F) unident. hypogeamicin 2 (M818.1T21.2), and (G) hypogeamicin A (M785.1T21.5) in *Nonomuraea* BBHARD23 extracts.

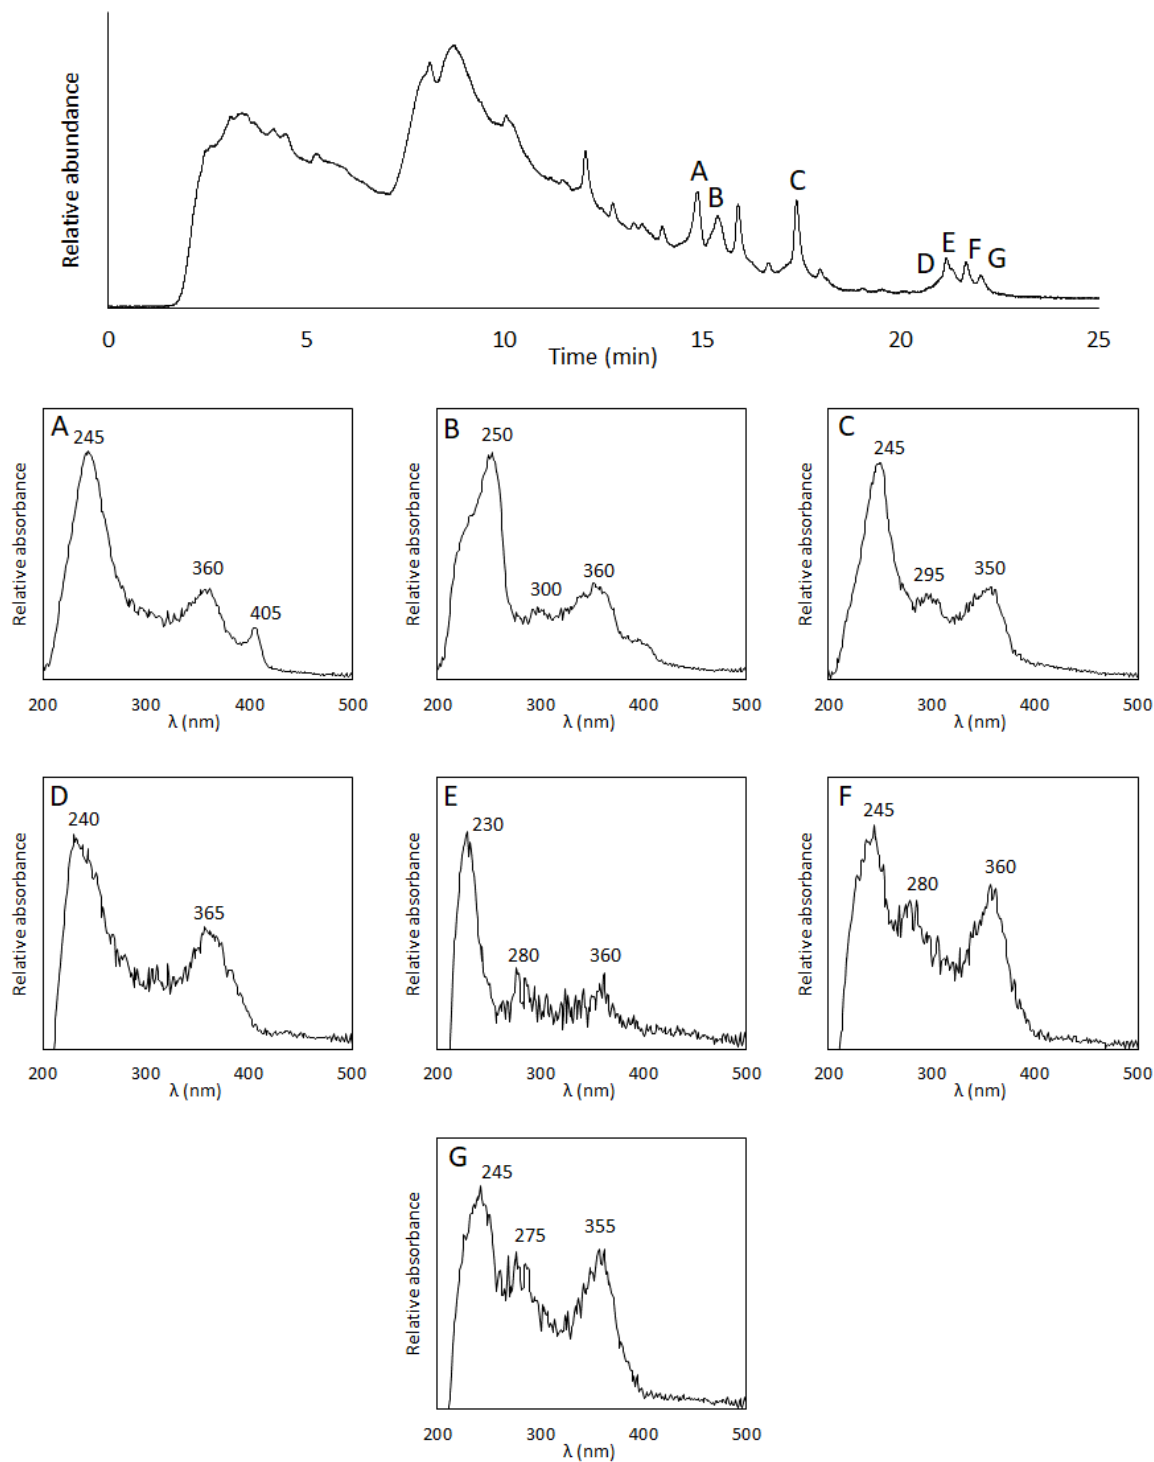

**FIG S15:** UV spectrum of (A) unident. actinomycin 1 (Y5) (M1271.6T22.6), and (B) actinomycin C2 (M1270.6T25.4), unident. actinomycin 2 (M1287.5T25.4, *actinomycin Y3*), unident. actinomycin 3 (M1293.6T25.4, *actinomycin G2*), unident. actinomycin 4 (M1257.7T25.4, *actinomycin F4*), unident. actinomycin 5 (M1307.5T25.4, *actinomycin Y2*), unident. actinomycin 6 (M1255.6T25.4, *actinomycin D*), unident. actinomycin 7 (M1327.7T25.4), and unident. actinomycin 8 (M1313.7T25.4) in *Streptomyces* BCCAGE06

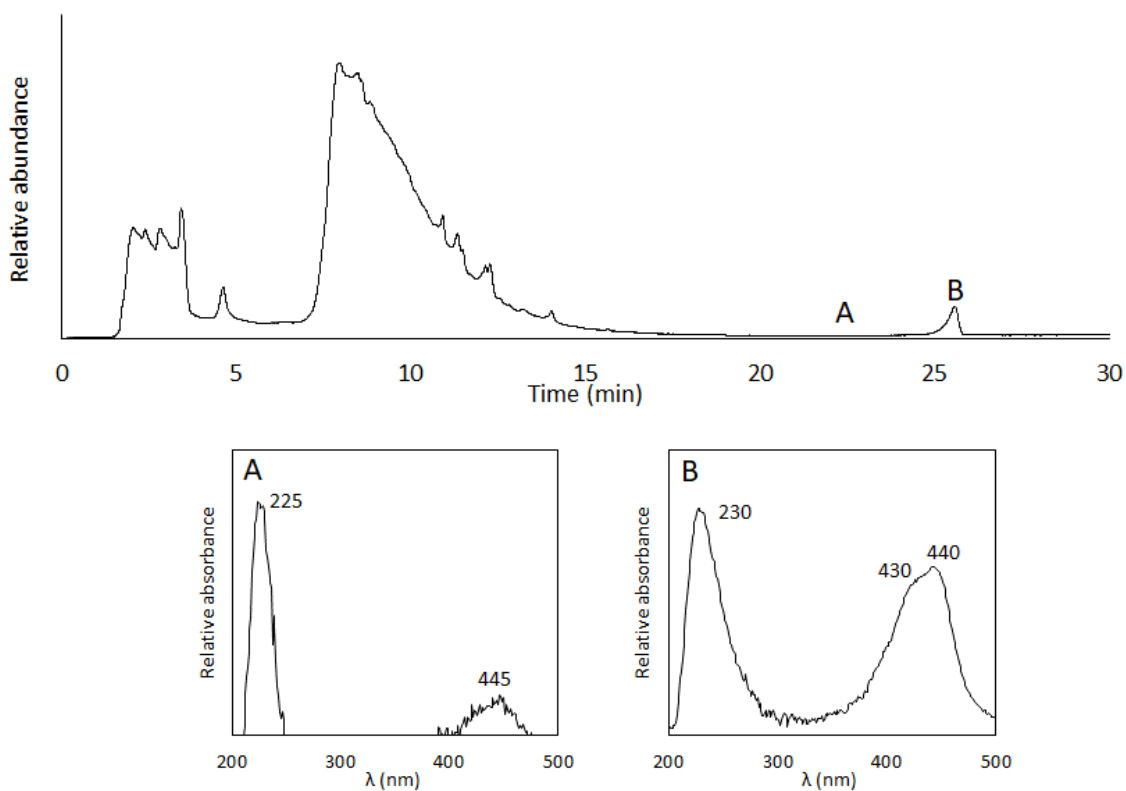

**FIG S16:** UV spectrum of (A) unident. NP 3 (M311.4T8.3), (B) unident. NP 4 (M287.5T9.5), (C) unident. NP 5 (M634.9T12.5), (D) unident. NP 6 (M295.5T12.9), (E) unident. NP 7-8 (M707.1T16.2, M311.4T16.6), and (F) and unident. NP 9 (M253.6T26.3, aloesaponarin II) in *Streptomyces* BCCAGE31.

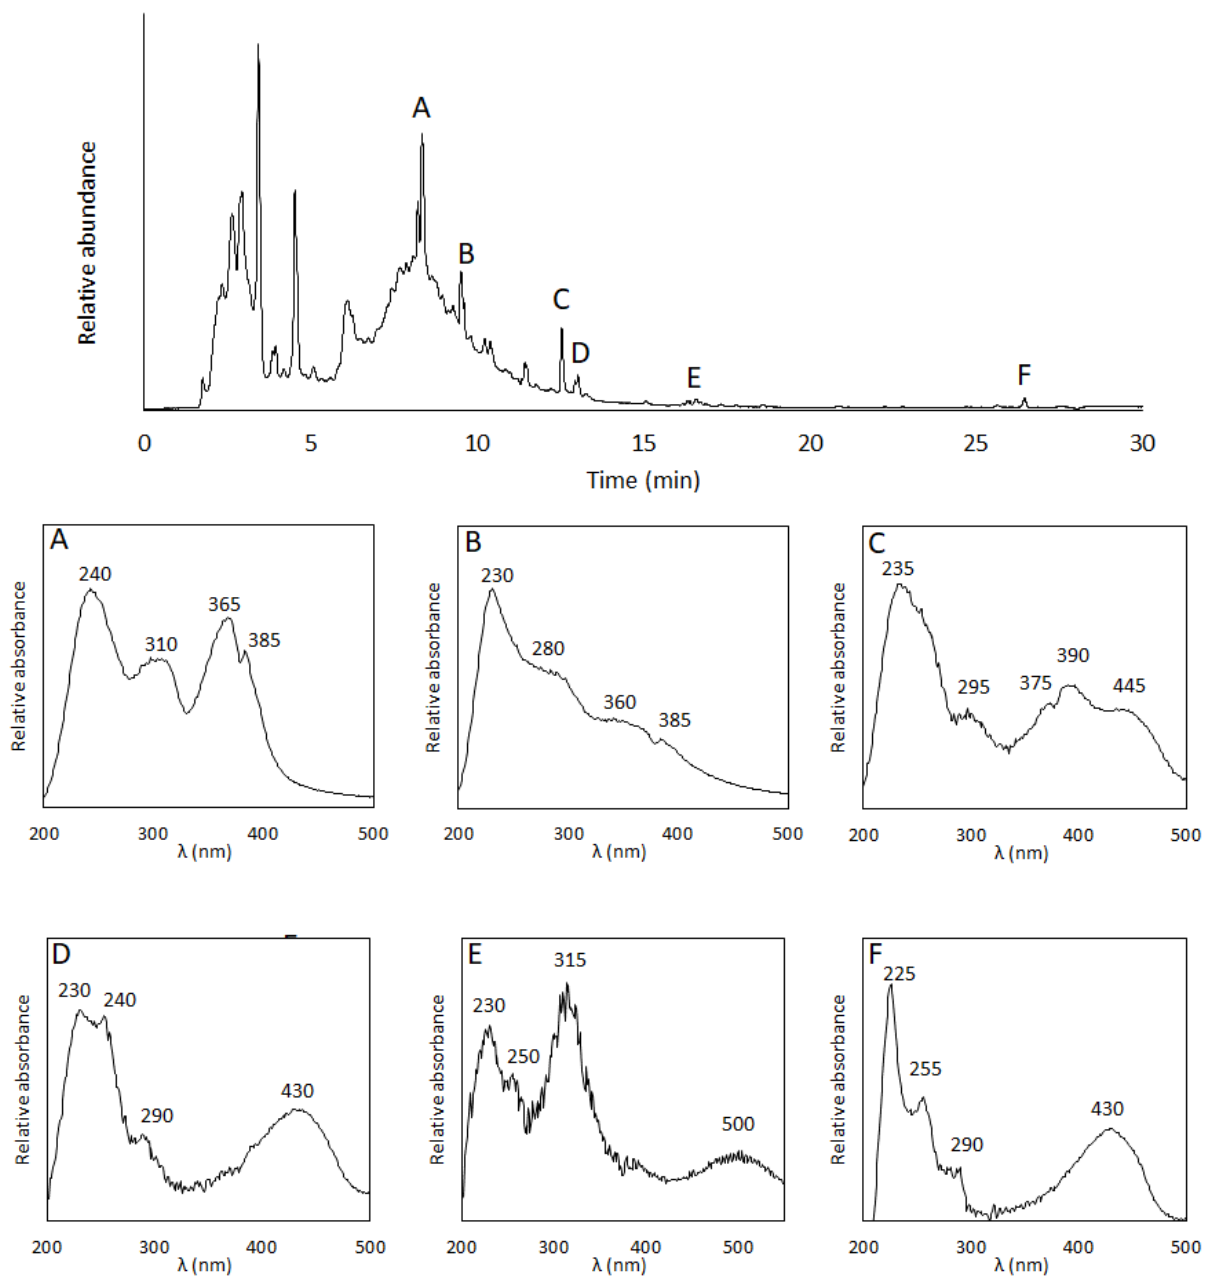

**FIG S17:** UV spectrum of (A) unident. NP 10 (M411.4T12), (B) unident. Polyene 1 (M628.1T12.7), (C) unident. Polyene 2 (M628.1T13.3), (D) unident. Polyene 3 (548.3T15.4), and (E) unident. Polyene 4 (548.3T16.2) in *Nonomuraea* BCCAGE42 extracts.

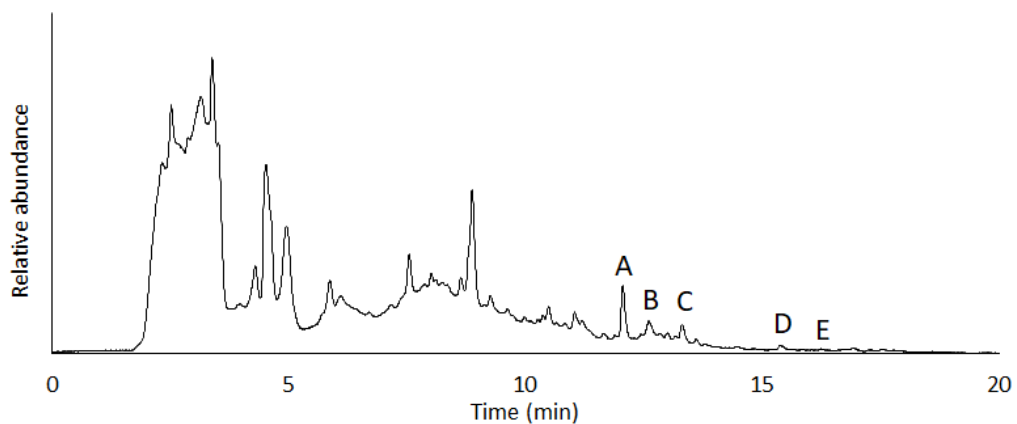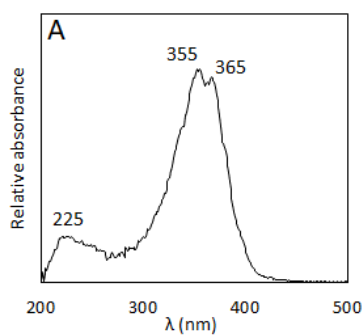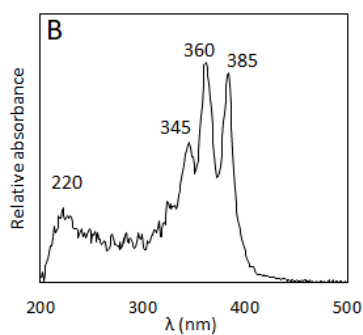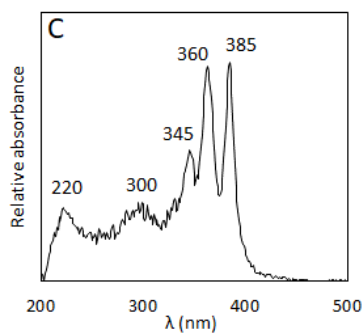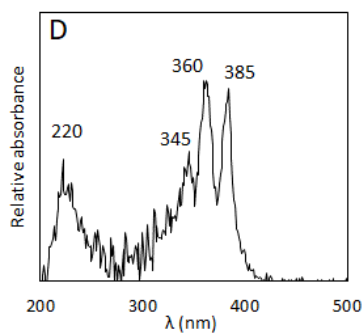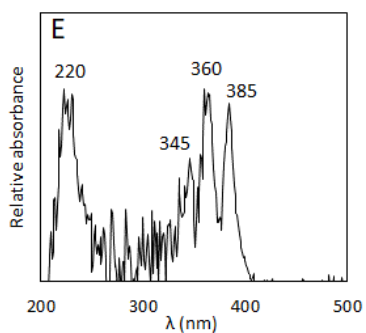



**FIG S18:** UV spectrum of (A) unident. NP. 11-12 (M900.2T17.1, M895.2T17.9) in *Streptomyces* BCCAGE18 extracts.

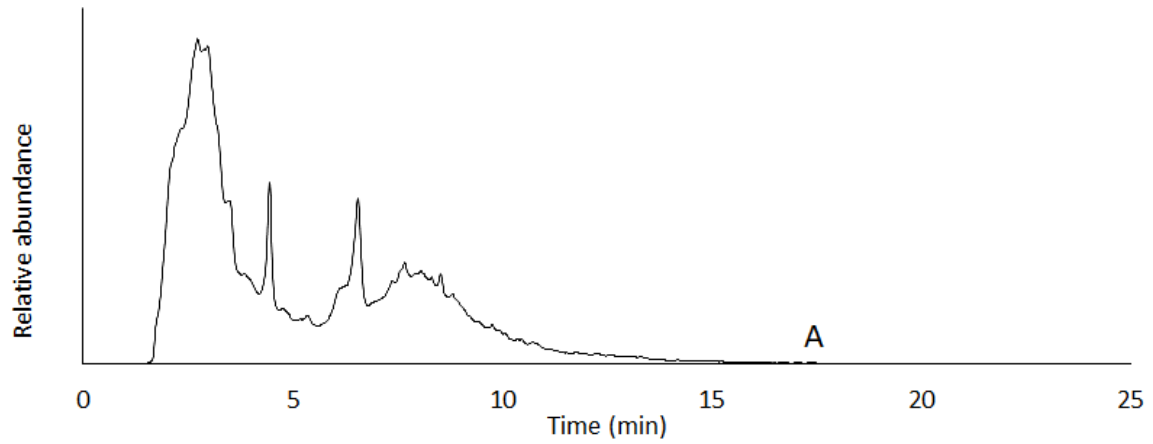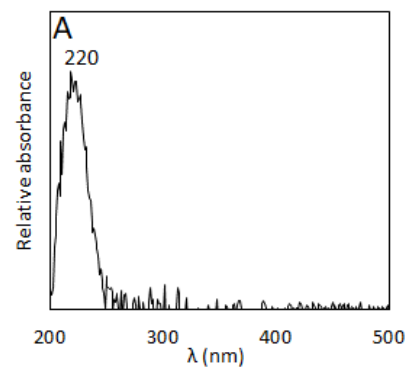

**FIG S19:** UV spectrum of (A) unident. NP 13 (M398.4T13.5), (B) unident. NP. 14 (M247.8T15.2), and (C) unident. NP. 15 (M257.8T24.2) from *Saccharothrix* BBHARD27 extracts.

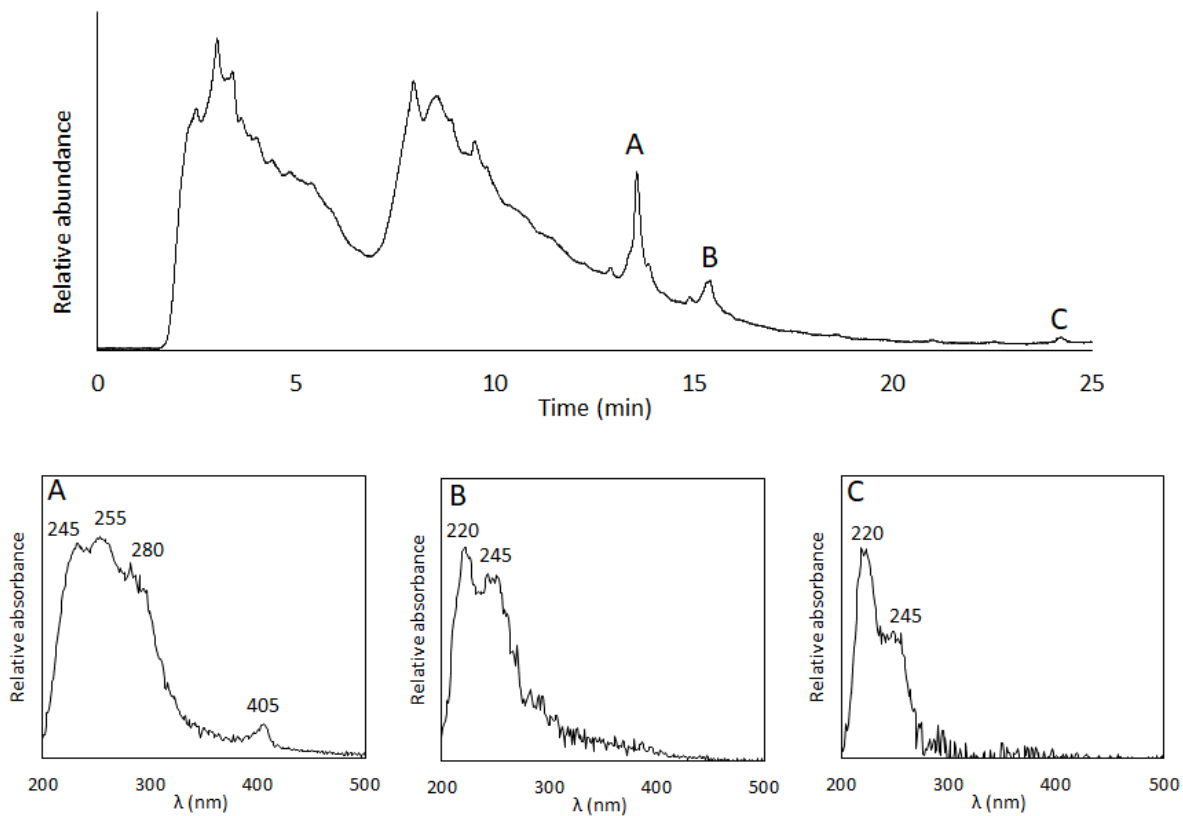

**FIG S20:** UV spectrum of (A) unident. Polyene 5 (M730.2T20.3) from *Kribella* BBSNAI08 extracts.

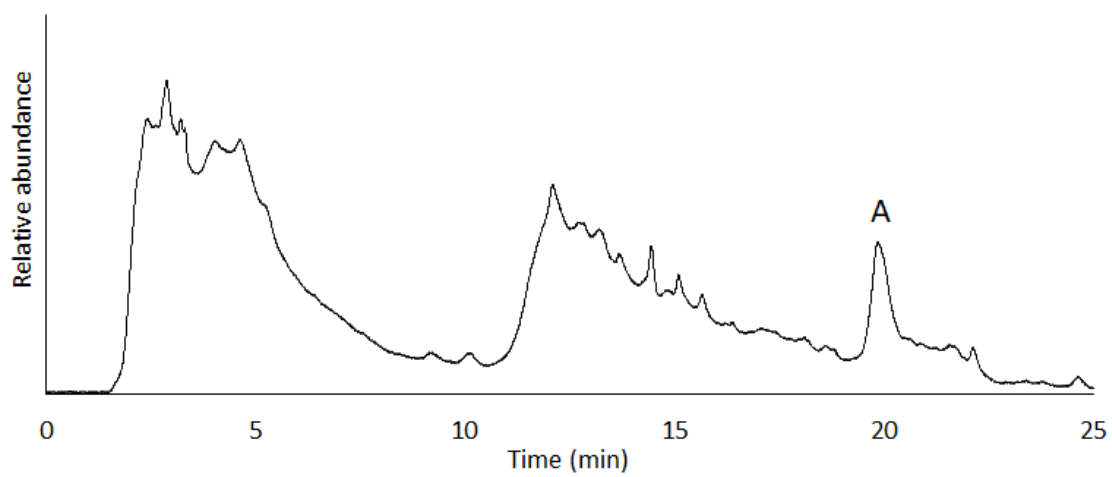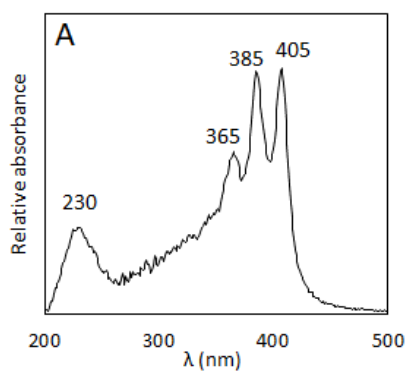

**FIG S21:** UV spectrum of (A) unident. NP. 16 and 17 (M689.2T10.5, M561.1T10.7), (B) unident. NP. 18 and 19 (M575.2T11.5, M717.2T11.6), (C) unident. NP. 20 (M731.3T12.1), (D) unident. NP. 21 (M355.4T13, *Arromycin*), (E) unident. NP. 22 (M393.2T13.7, *Linfuranone A*), (F) propeptin 1 (M1056.4T14), (G) propeptin 2 (M1146.9T14.6), (H) unident. tetarimycin 1 (M385.2T14.7), (I) unident. tetarimycin 2 (M399.2T16.1), (J) tetarimycin B (M369.3T17), (K), unident. tetarimycin 3 (M406.3T17.5) and (L) unident. tetarimycin 4 (M395.2T19.5) from *Microbispora* BCCAGE54 extracts.

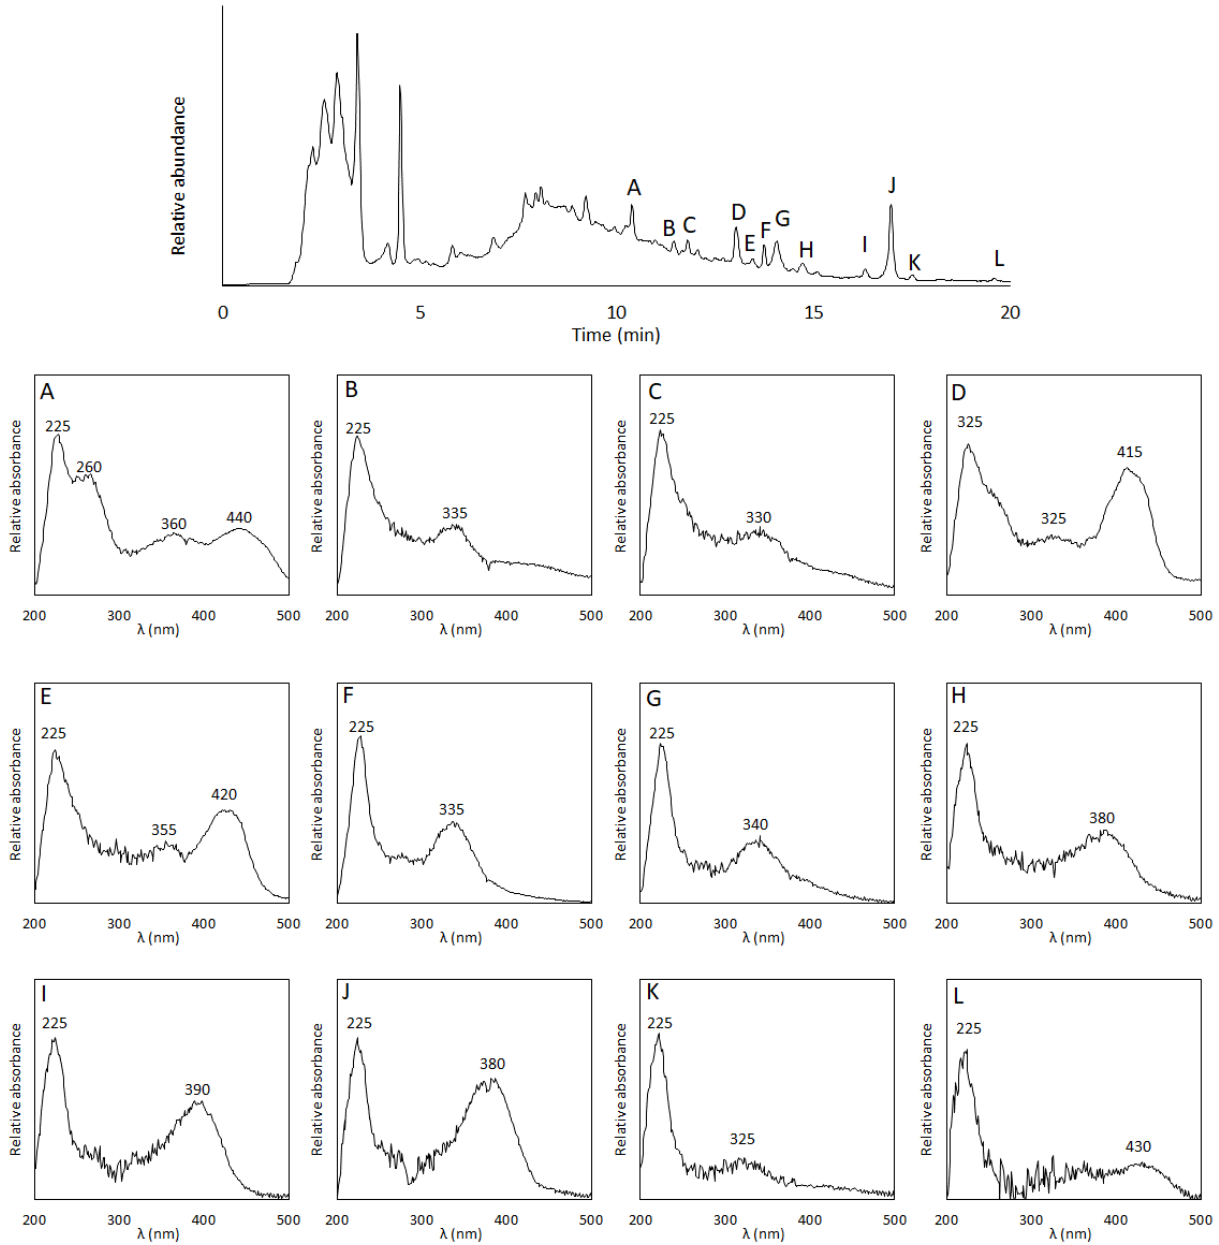

**FIG S22:** UV spectrum of (A) funisamine (M1178.3T15.6) from *Streptosporangium* KDCAGE35 extracts.

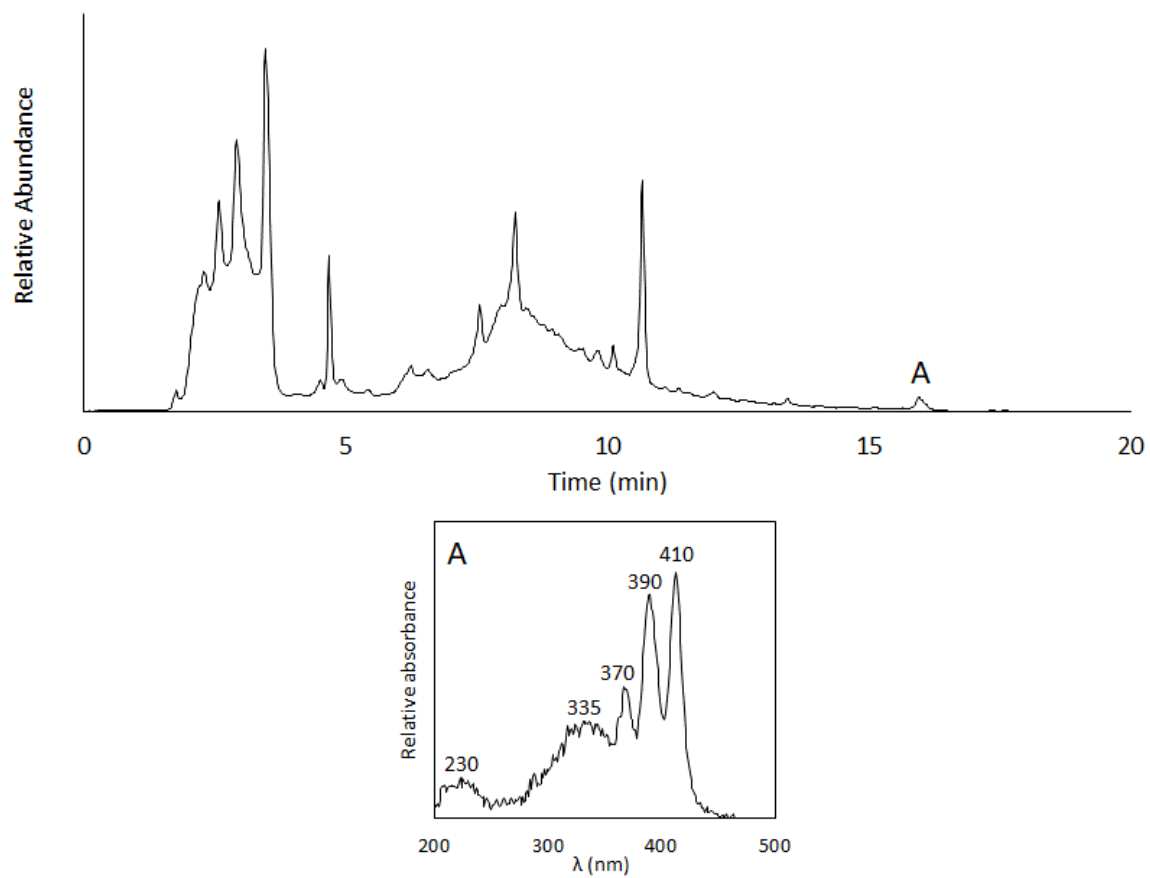

## A. 7. NMR Spectra for identified natural products

The following are NMR spectra taken for selected compounds in table S1

**FIG S23:** H-NMR spectrum of aloesaponarin II from *Nonomuraea* BBHARD22 in Acetone-d<sub>6</sub>

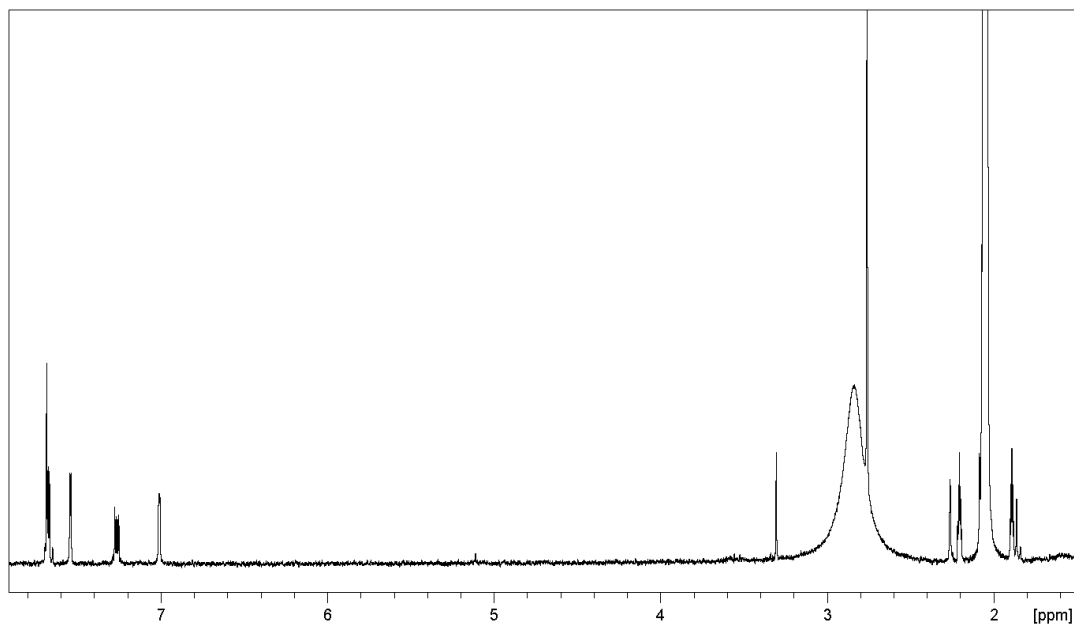

**FIG S24:** H-NMR spectrum of aloesaponarin II from *Nonomuraea* BBHARD22 in Acetone-d<sub>6</sub> expanded to show the aromatic region.

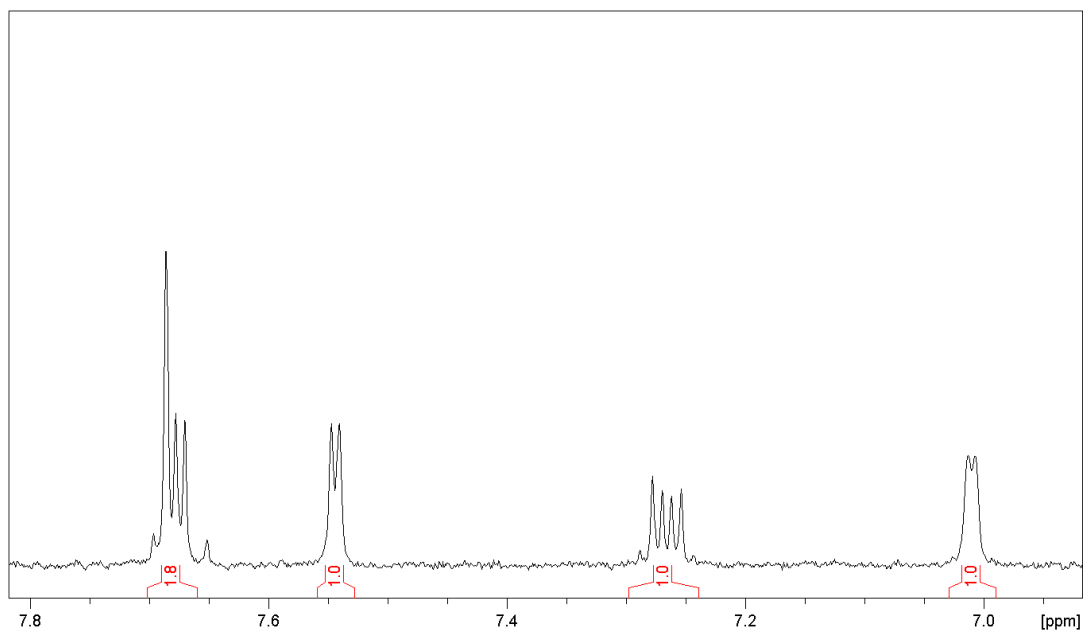

**FIG S25:** H-NMR spectrum partially purified okicenone from *Nonomuraea* BBHARD22 in Methanol-d4. Peaks corresponding to okicenone indicated by (\*).

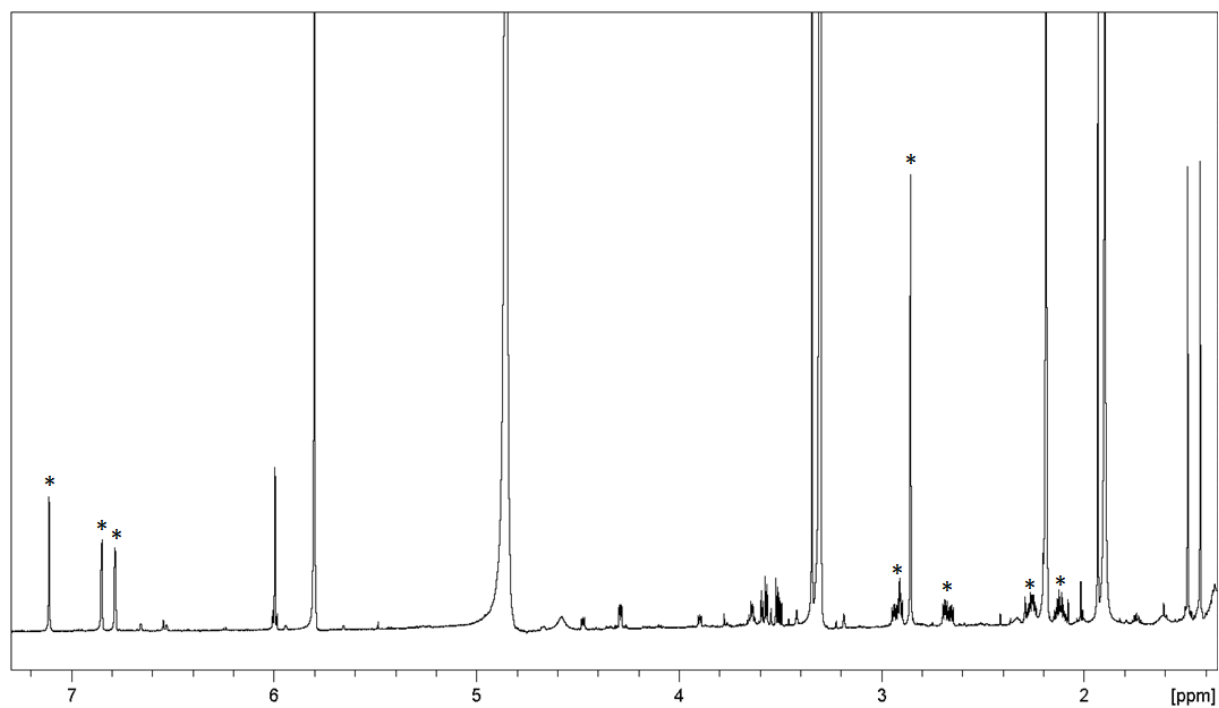

**FIG S26:** H-NMR spectrum of tetarimycin B from *Microbispora* BCCAGE54 in Methanol-d4

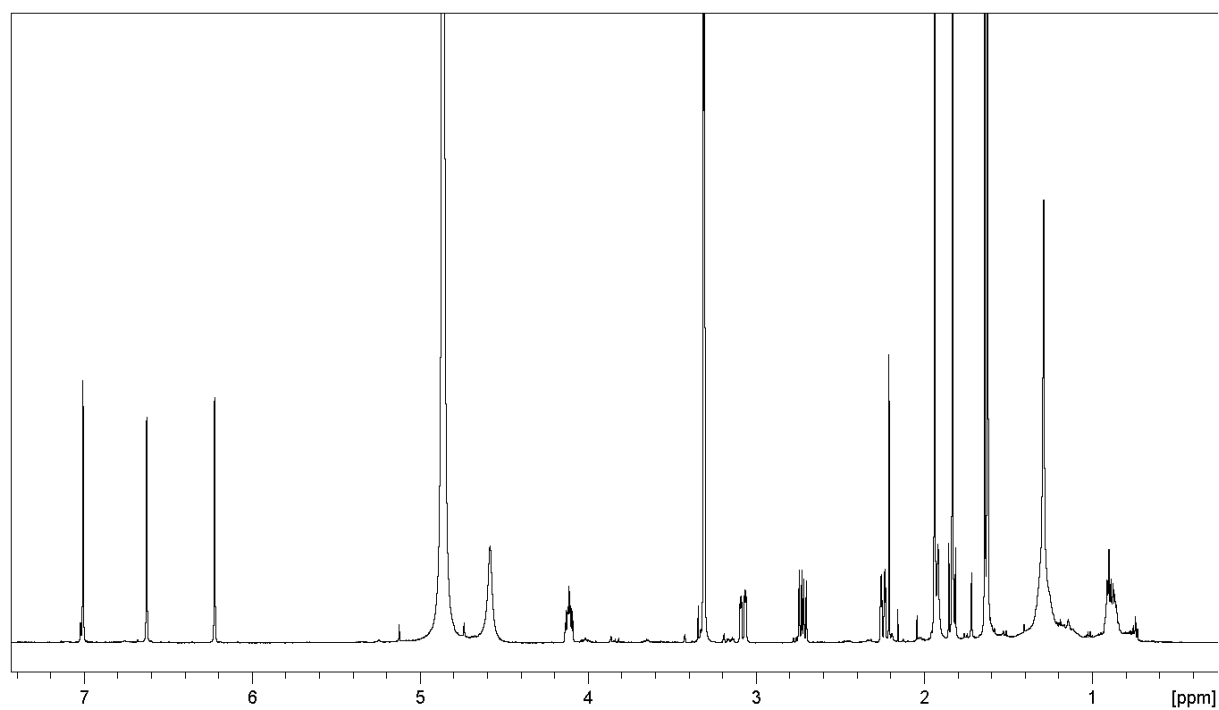

**FIG S27:** H-NMR spectrum of hypogeamicin B from *Nonomuraea* BBHARD23 in Methanol-d4

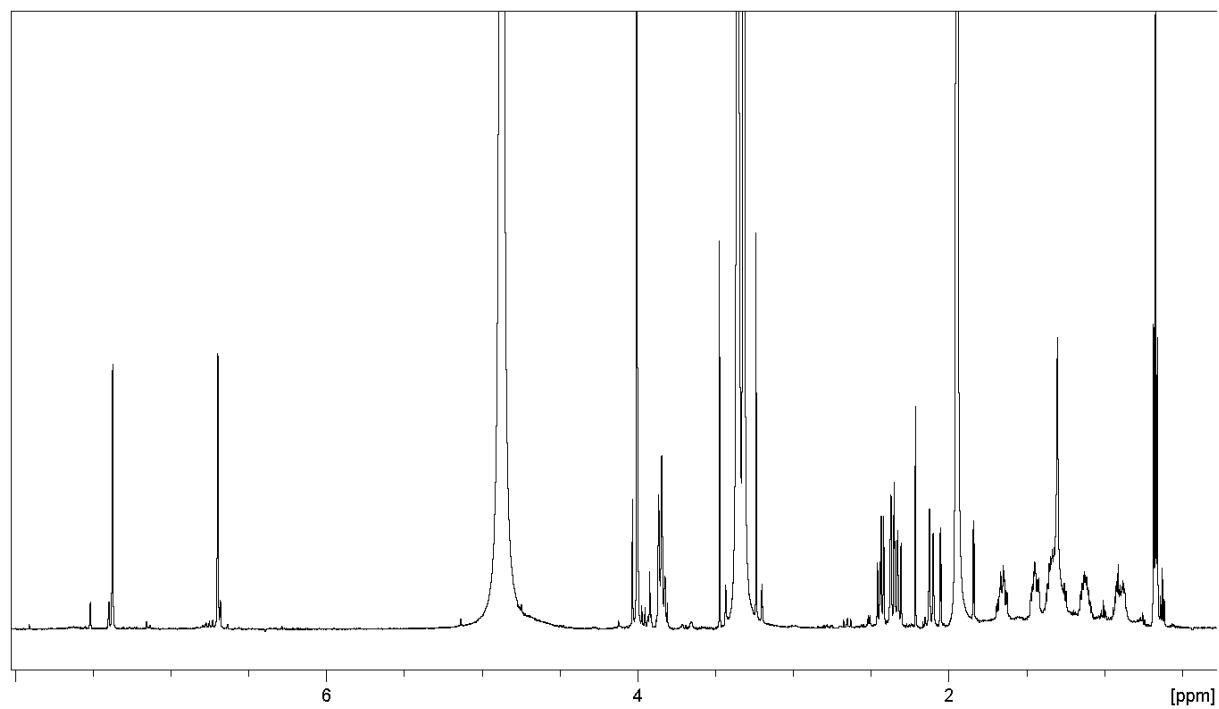

**FIG S28:** H-NMR spectrum of actinomycin C from *Streptomyces* BCCAGE06 in Chloroform-d1

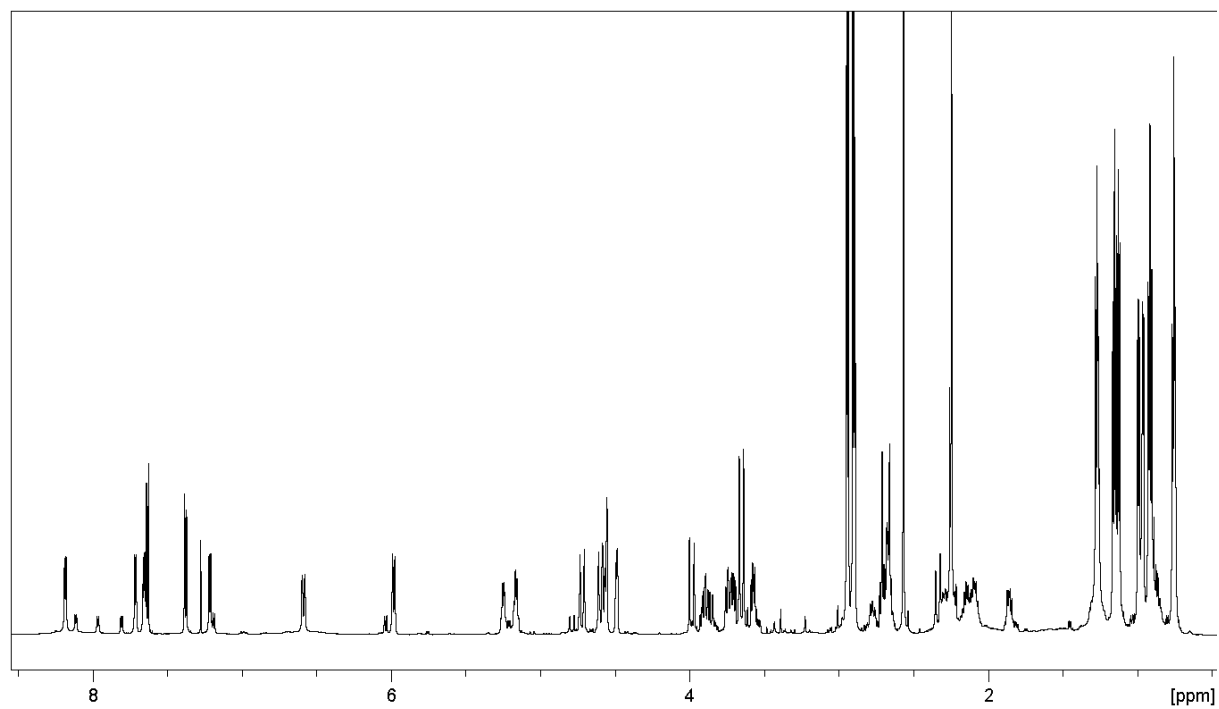



## B.1. NMR correlation table for funisamine

**Table S5:** NMR data for funisamine

| Pos. | $\delta_C$ | $\delta_H$                   | HMBC             | NOESY         |
|------|------------|------------------------------|------------------|---------------|
| 1    | 172.6      |                              |                  |               |
| 2    | 125.1      | 5.88, 1H, d (15.2 Hz)        | 4                |               |
| 3    | 141.7      | 7.13, 1H, dd (11.7, 15.2 Hz) | 1, 4, 5          | 5             |
| 4    | 129.9      | 6.32, 1H, dd (11.7, 14.5 Hz) |                  |               |
| 5    | 138.9      | 6.53, 1H, dd (11, 14.5 Hz)   | 3                | 3, 7          |
| 6    | 130.0      | 6.22, 1H, dd (11, 14.8 Hz)   |                  |               |
| 7    | 136.2      | 6.35, 1H, dd (10.1, 14.8 Hz) | 5, 6, 9          | 5             |
| 8    | 130.7      | 6.12, 1H, dd (10.1, 14.9 Hz) | 10               |               |
| 9    | 137.0      | 5.78, 1H, (dt (7.5, 14.9 Hz) | 7, 10            |               |
| 10   | 29.7       | 2.13, 2H, dd (7.2 Hz)        | 8, 9, 10, 12     | 8, 11, 12, 13 |
| 11   | 29.5       | 1.30, 1.41, 2H               | 8, 9, 10, 12, 13 |               |
| 12   | 39.9       | 1.57, 1H                     |                  |               |
| 13   | 78.3       | 3.93, 1H, d                  | 10, 12, 59, 60   | 15            |
| 14   | 140.2      |                              |                  |               |
| 15   | 126.1      | 6.13, 1H, d (10.5 Hz)        | 13, 59           | 17            |
| 16   | 128.7      | 6.52, 1H, dd (11.6, 14.5 Hz) | 18               |               |
| 17   | 133.2      | 6.26, 1H, overlap            |                  |               |
| 18   | 133.5      | 6.37, 1H, overlap            |                  |               |
| 19   | 133.5      | 6.37, 1H, overlap            |                  |               |
| 20   | 133.5      | 6.37, 1H, overlap            |                  |               |
| 21   | 133.5      | 6.37, 1H, overlap            |                  |               |
| 22   | 133.5      | 6.37, 1H, overlap            |                  |               |
| 23   | 133.0      | 6.36, 1H, overlap            |                  |               |
| 24   | 132.9      | 6.3, 1H, overlap             |                  |               |
| 25   | 131.8      | 6.25, 1H, overlap            |                  |               |
| 26   | 133.5      | 6.2, 1H, overlap             |                  |               |
| 27   | 129.8      | 5.82, 1H, dt (7.4, 14.7 Hz)  | 28, 29           |               |
| 28   | 35.1       | 2.45, 2.62, 2H, overlap      | 26, 27, 29, 30   |               |
| 29   | 79.0       | 4.61, 1H, dd (5.6 Hz)        | 27, 30, 31, 58   |               |
| 30   | 47.5       | 3.2, 1H                      | 28, 29, 31, 58   |               |
| 31   | 215.5      |                              |                  |               |
| 32   | 50.8       | 2.91, 1H,                    | 31, 57           |               |
| 33   | 66.7       | 4.01, 1H                     |                  |               |
| 34   | 41.3       | 1.56, 1.71 2H                | 39               |               |
| 35   | 70.9       | 4.25, 1H, q (6.8 Hz)         | 34, 36, 37       |               |
| 36   | 135.0      | 5.53, 1H, dd (7.3, 15.3 Hz)  | 35, 38           |               |
| 37   | 127.7      | 5.72, 1H, dt (7.2, 15.3 Hz)  | 35, 38           |               |
| 38   | 40.1       | 2.24, 2H, multiplet          | 36, 37, 39, 40,  |               |

| Pos. | $\delta_C$ | $\delta_H$          | HMBC           | NOESY                    |
|------|------------|---------------------|----------------|--------------------------|
| 39   | 69.7       | 3.84, 1H            |                |                          |
| 40   | 43.1       | 1.56, 1.67, 2H      |                |                          |
| 41   | 68.6       | 3.99, 1H            |                | 38, 39                   |
| 42   | 43.0       | 1.6, 2H             |                |                          |
| 43   | 66.8       | 4.04, 1H            | 45             |                          |
| 44   | 43.0       | 1.6, 2H             |                |                          |
| 45   | 64.5       | 4.1, 1H             |                |                          |
| 46   | 43.0       | 1.6, 2H             |                |                          |
| 47   | 69.0       | 4, 1H               |                |                          |
| 48   | 43.2       | 1.6, 2H             |                |                          |
| 49   | 69.0       | 4, 1H               |                |                          |
| 50   | 44.3       | 1.6, 2H             |                |                          |
| 51   | 68.6       | 3.96, 1H            |                |                          |
| 52   | 44.7       | 1.53, 2H            |                |                          |
| 53   | 68.9       | 3.81, 1H            |                |                          |
| 54   | 33.5       | 1.47, 1.62, 2H      | 53             |                          |
| 55   | 23.7       | 1.76, 1.81, 2H      | 53, 54, 56     |                          |
| 56   | 39.4       | 2.95, 2H            | 54, 55         |                          |
| 57   | 10.1       | 1.1, 3H, d (7 Hz)   | 31, 32         | 29, 30, 32, 33,<br>35    |
| 58   | 12.2       | 1.14, 3H, d (7 Hz)  | 29, 30, 31     | 28, 29, 30, 32,<br>33    |
| 59   | 11.8       | 1.74, 3H, s         | 13, 14, 15, 16 |                          |
| 60   | 30.7       | 1.26, 1.47 2H       |                |                          |
| 61   | 19.5       | 1.25, 1.42, 2H      | 9              | 8, 10, 11, 13,<br>60, 62 |
| 62   | 13.4       | 0.9, 3H, t (7.1 Hz) |                | 61                       |

B.2. NMR spectroscopic data for funisamine

**FIG S29:** H-NMR (600 MHz) spectrum of funisamine from *Streptosporangium* sp. KDCAGE35 in Methanol-d4

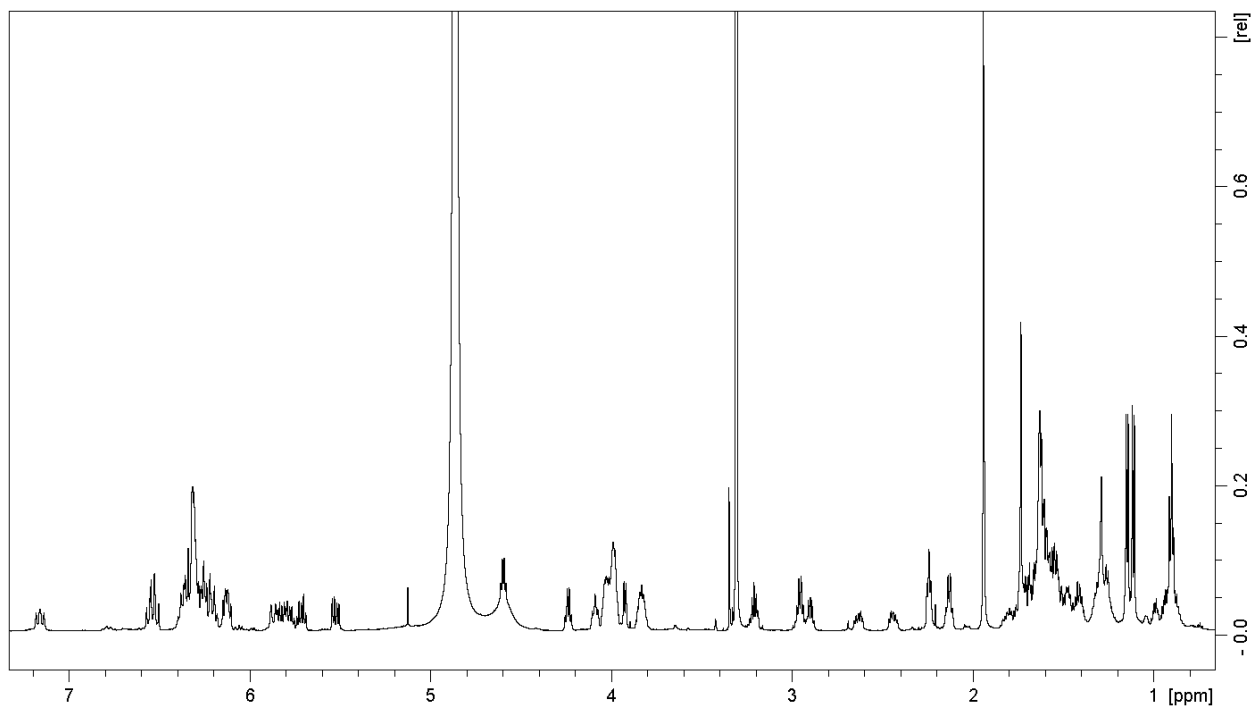

**FIG S30:** C-NMR (600 MHz) spectrum of funisamine from *Streptosporangium* sp. KDCAGE35 in Methanol-d4

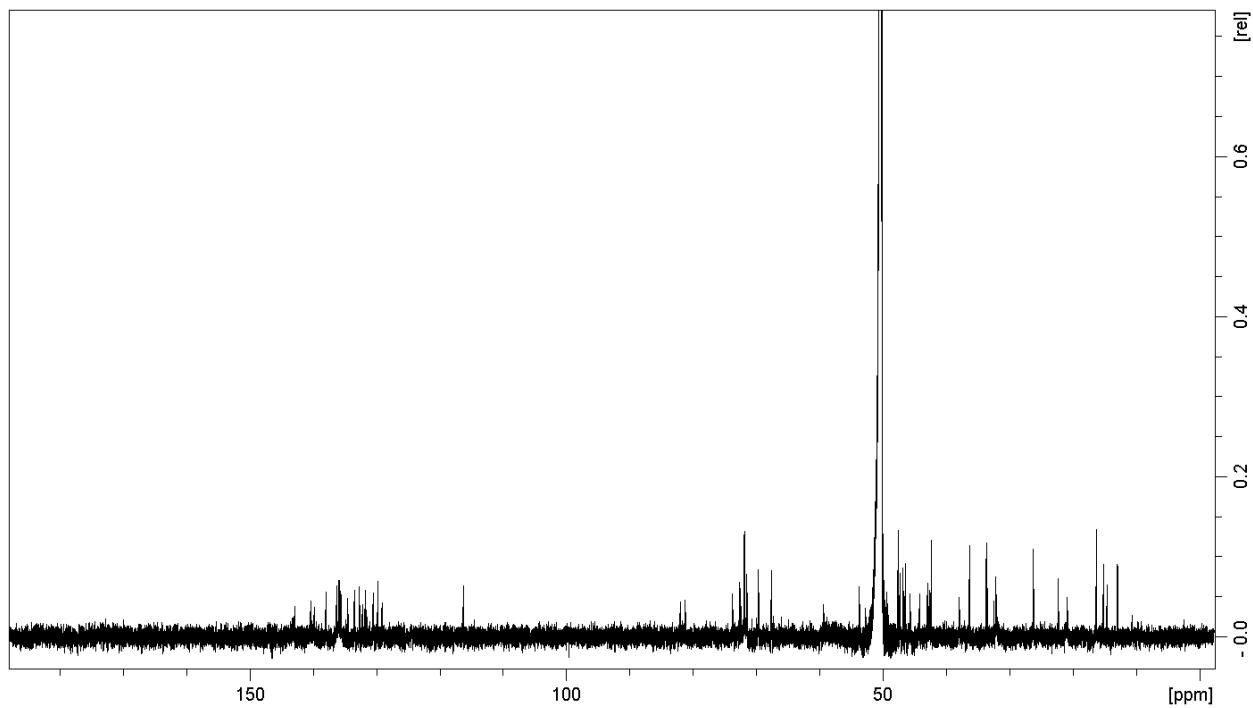

**FIG S31:** COSY (600 MHz) spectrum of funisamine from *Streptosporangium* sp. KDCAGE35 in Methanol-d4

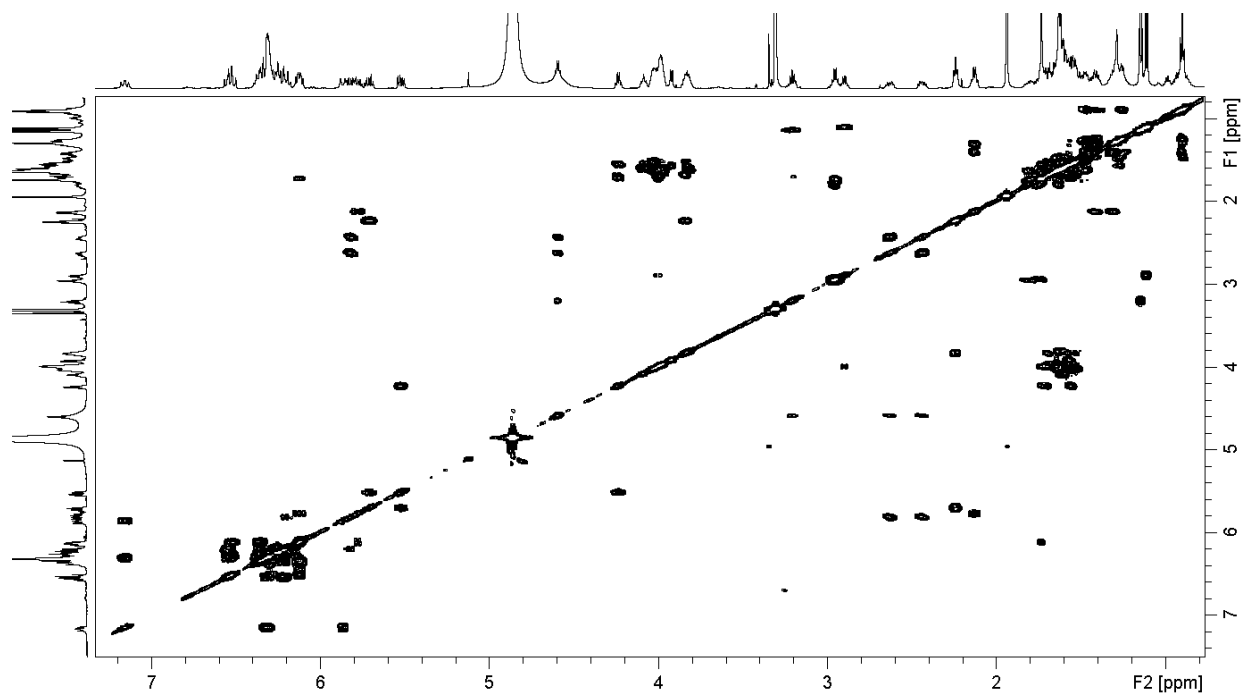

**FIG S32:** COSY (600 MHz) spectrum of funisamine from *Streptosporangium* sp. KDCAGE35 in Methanol-d4 enlarged to show aromatic couplings.

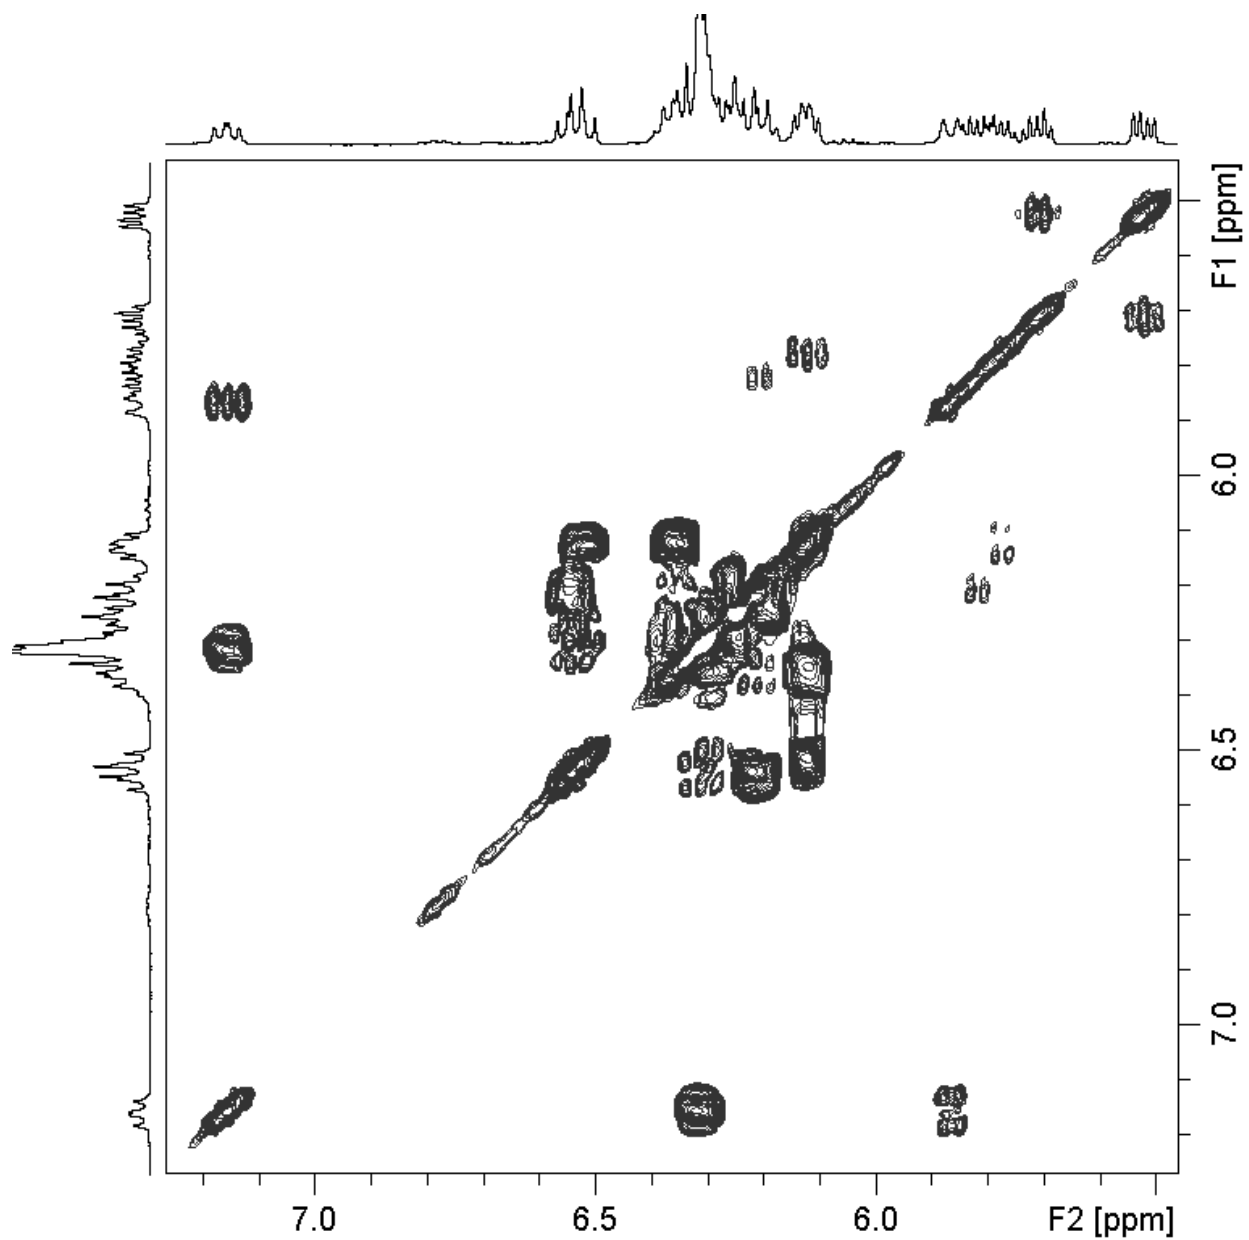

**FIG S33:** COSY (600 MHz) spectrum of funisamine from *Streptosporangium* sp. KDCAGE35 in Methanol-d4 enlarged to methylene and hydroxy-methine couplings.

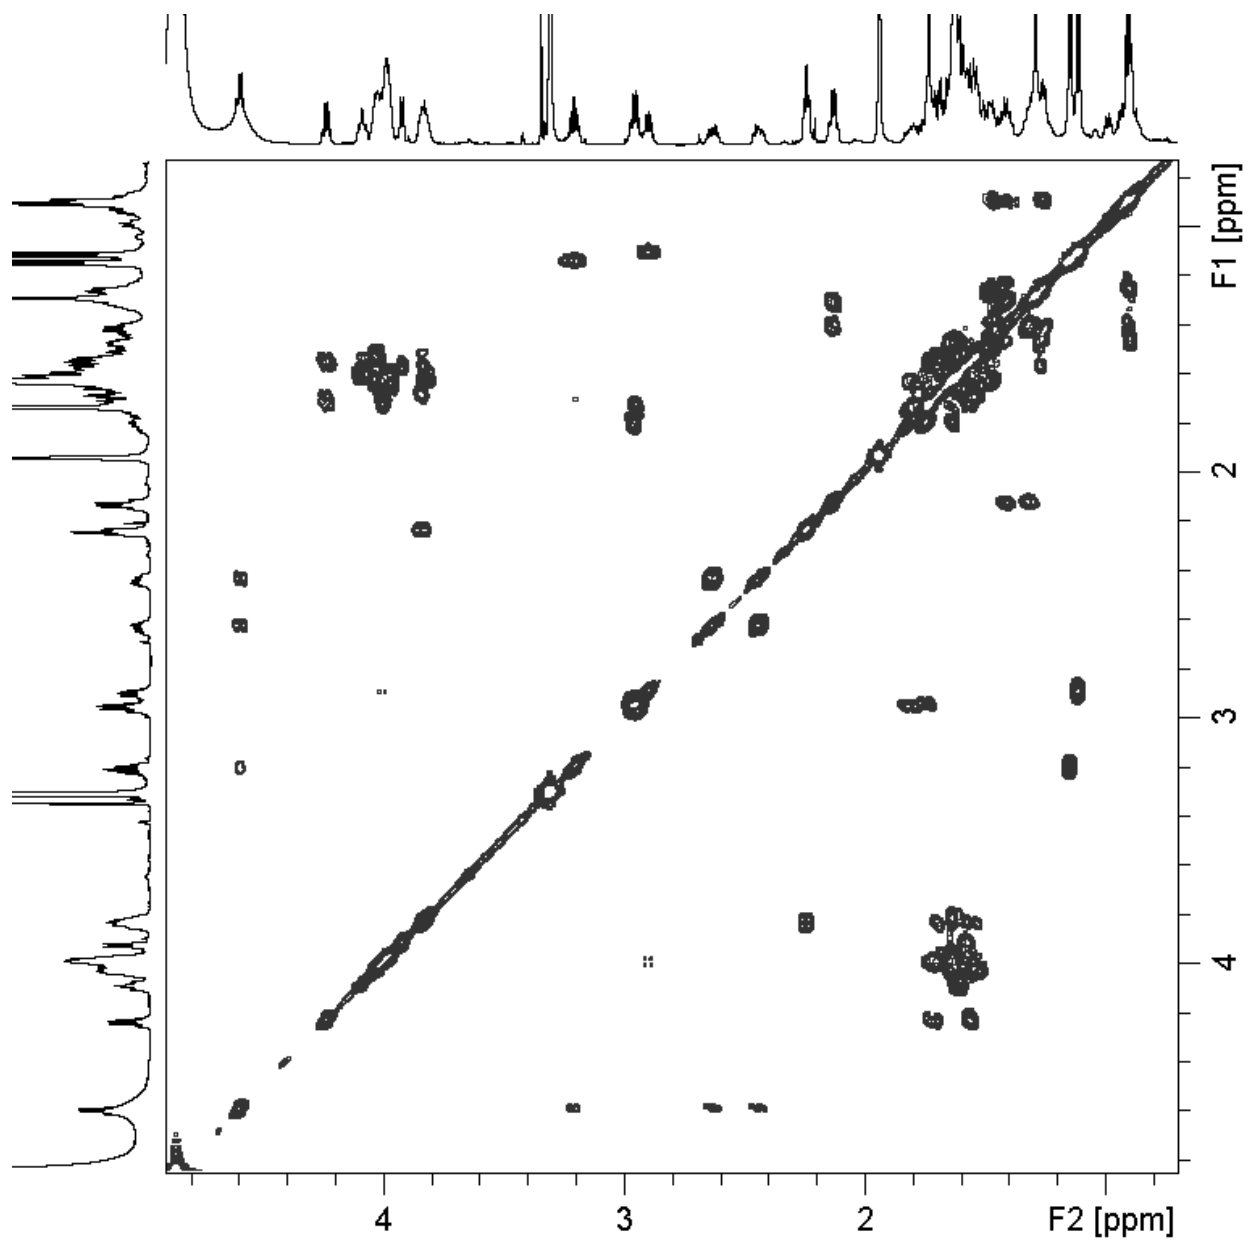

**FIG S34:** TOCSY (600 MHz) spectrum of funisamine from *Streptosporangium* sp. KDCAGE35 in Methanol-d4

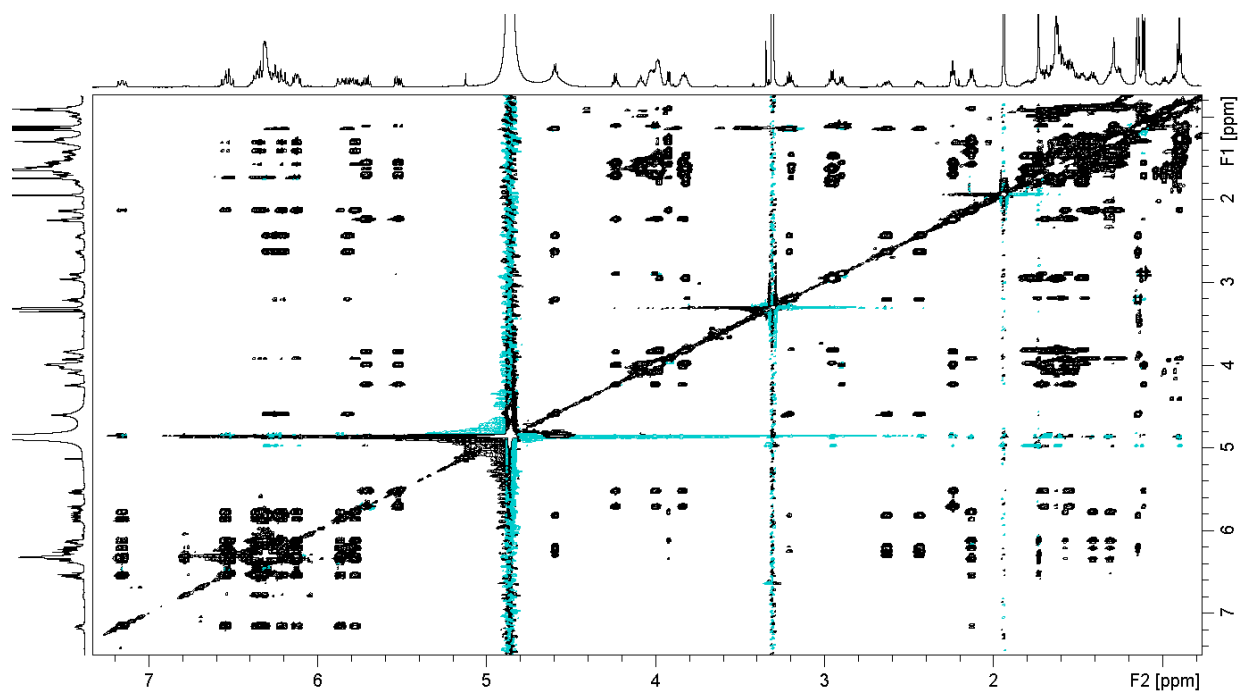

**FIG S35:** TOCSY (600 MHz) spectrum of funisamine from *Streptosporangium* sp. KDCAGE35 in Methanol-d4 enlarged to show upfield couplings.

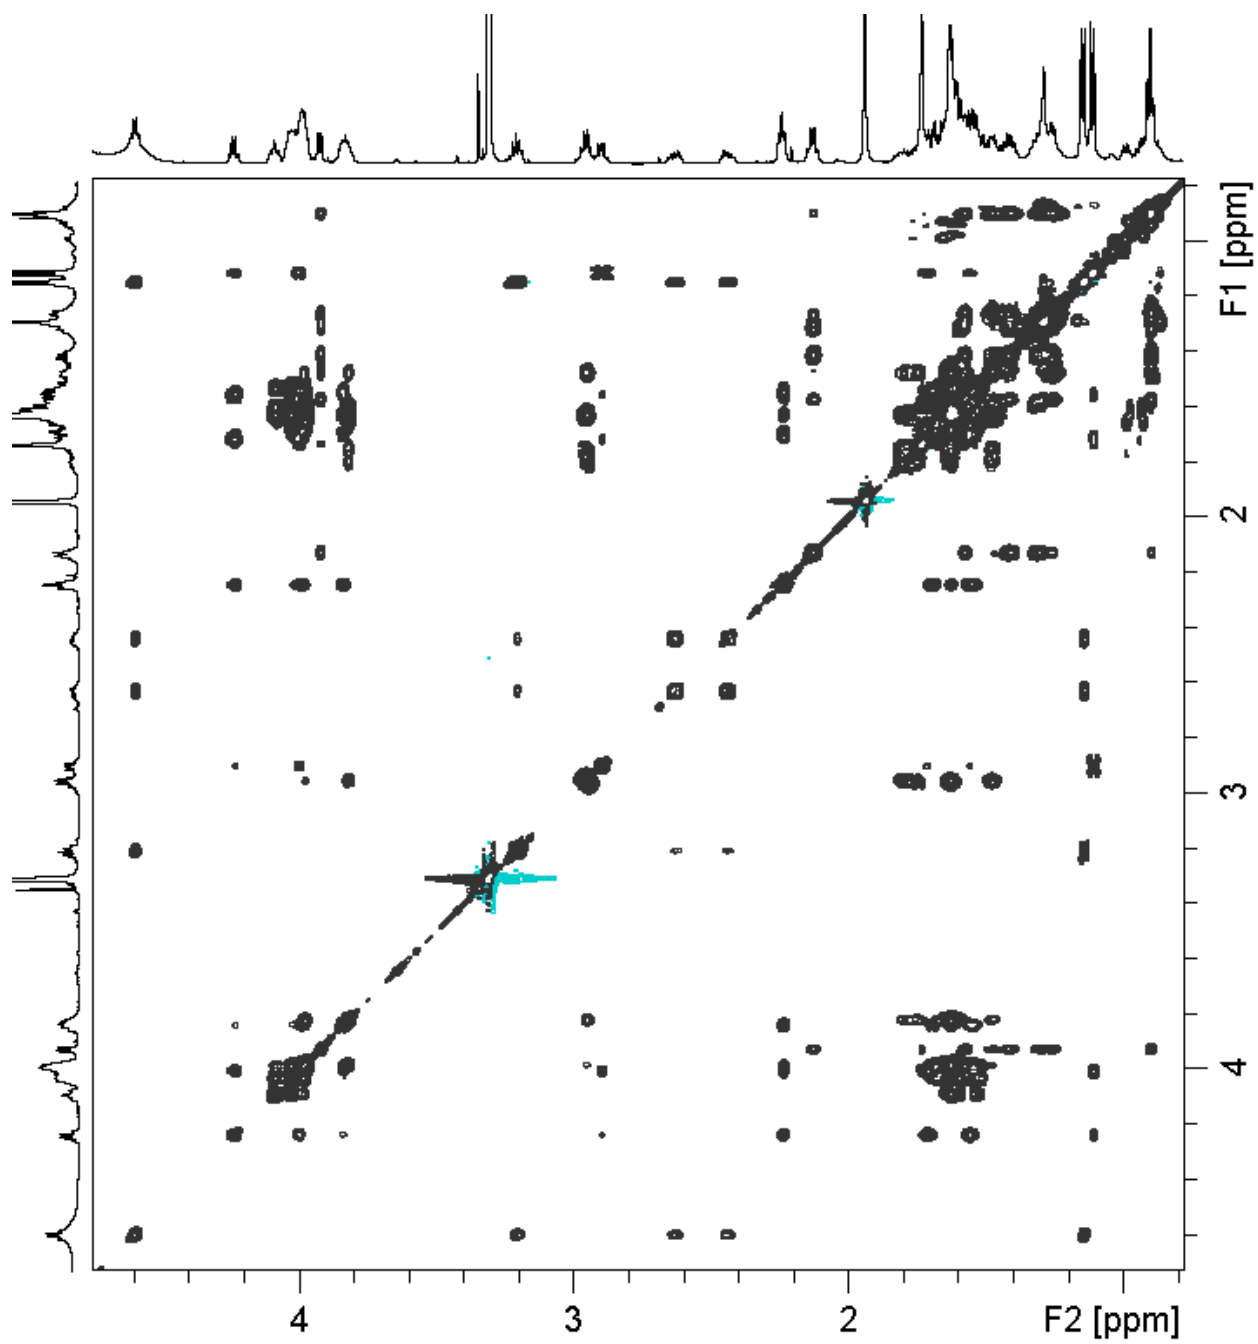



**FIG S36:** TOCSY (600 MHz) spectrum of funisamine from *Streptosporangium* sp. KDCAGE35 in Methanol-d4 enlarged to show downfield couplings.

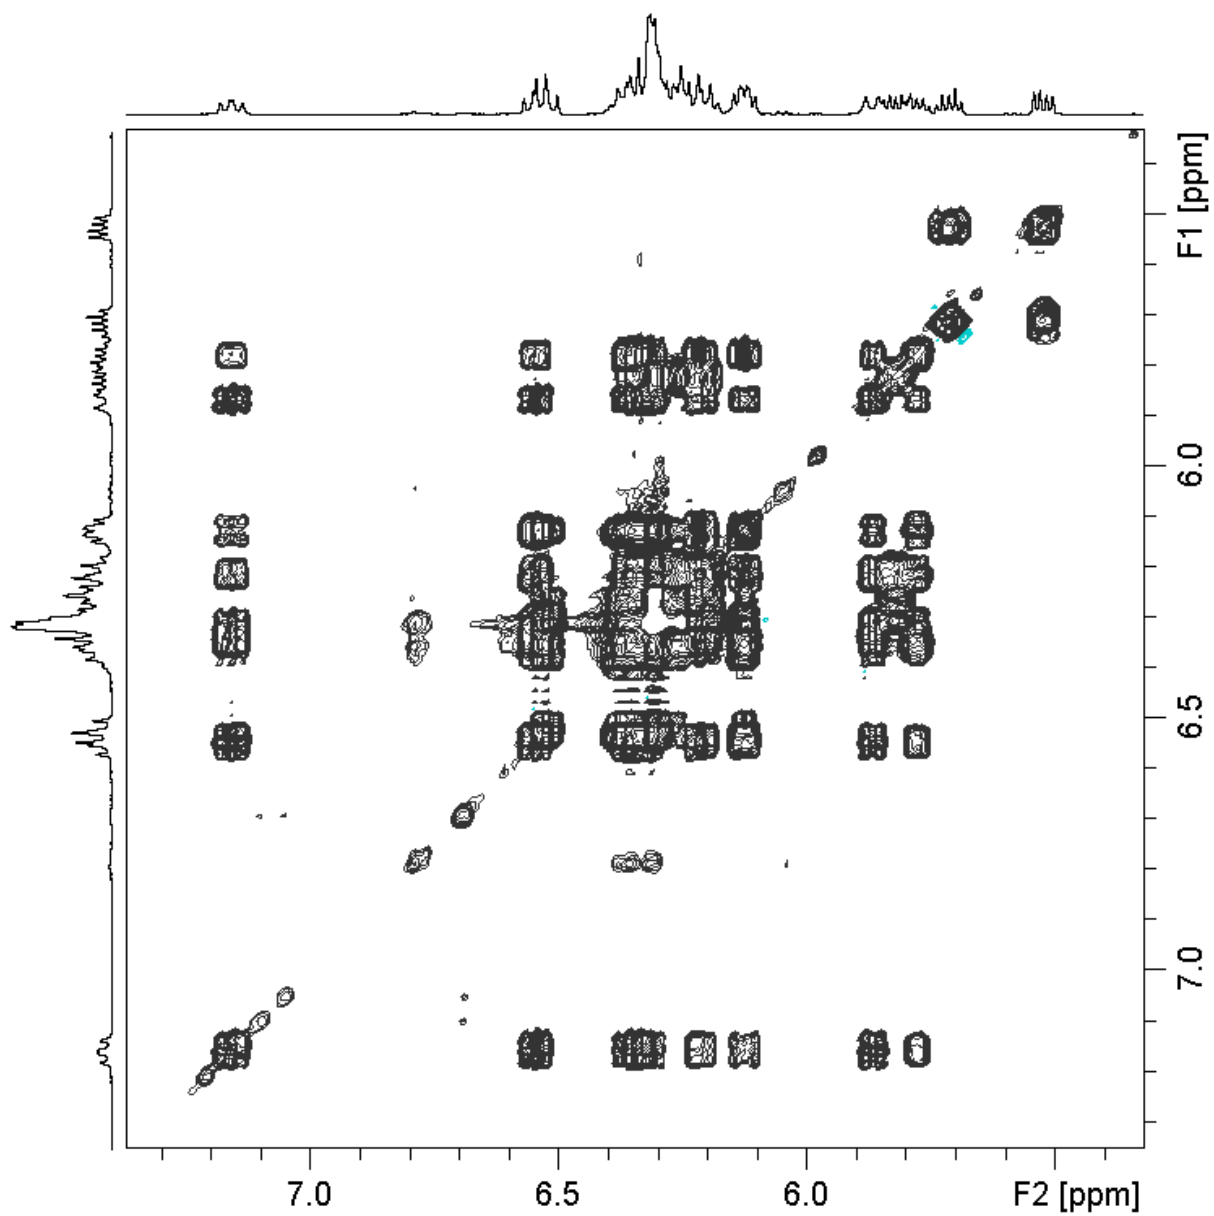

**FIG S37:** HSQC (600 MHz) spectrum of funisamine from *Streptosporangium* sp. KDCAGE35 in Methanol-d4

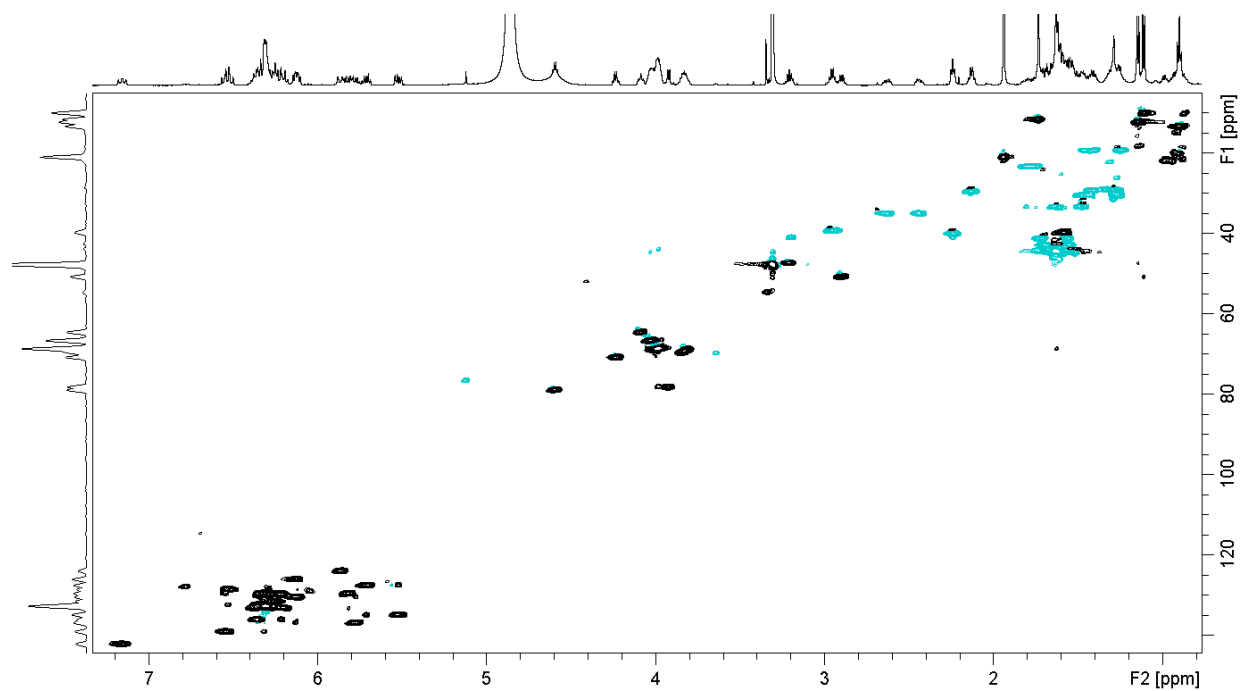

**FIG S38:** HSQC (600 MHz) spectrum of funisamine from *Streptosporangium* sp. KDCAGE35 in Methanol-d4 enlarged to show downfield couplings.

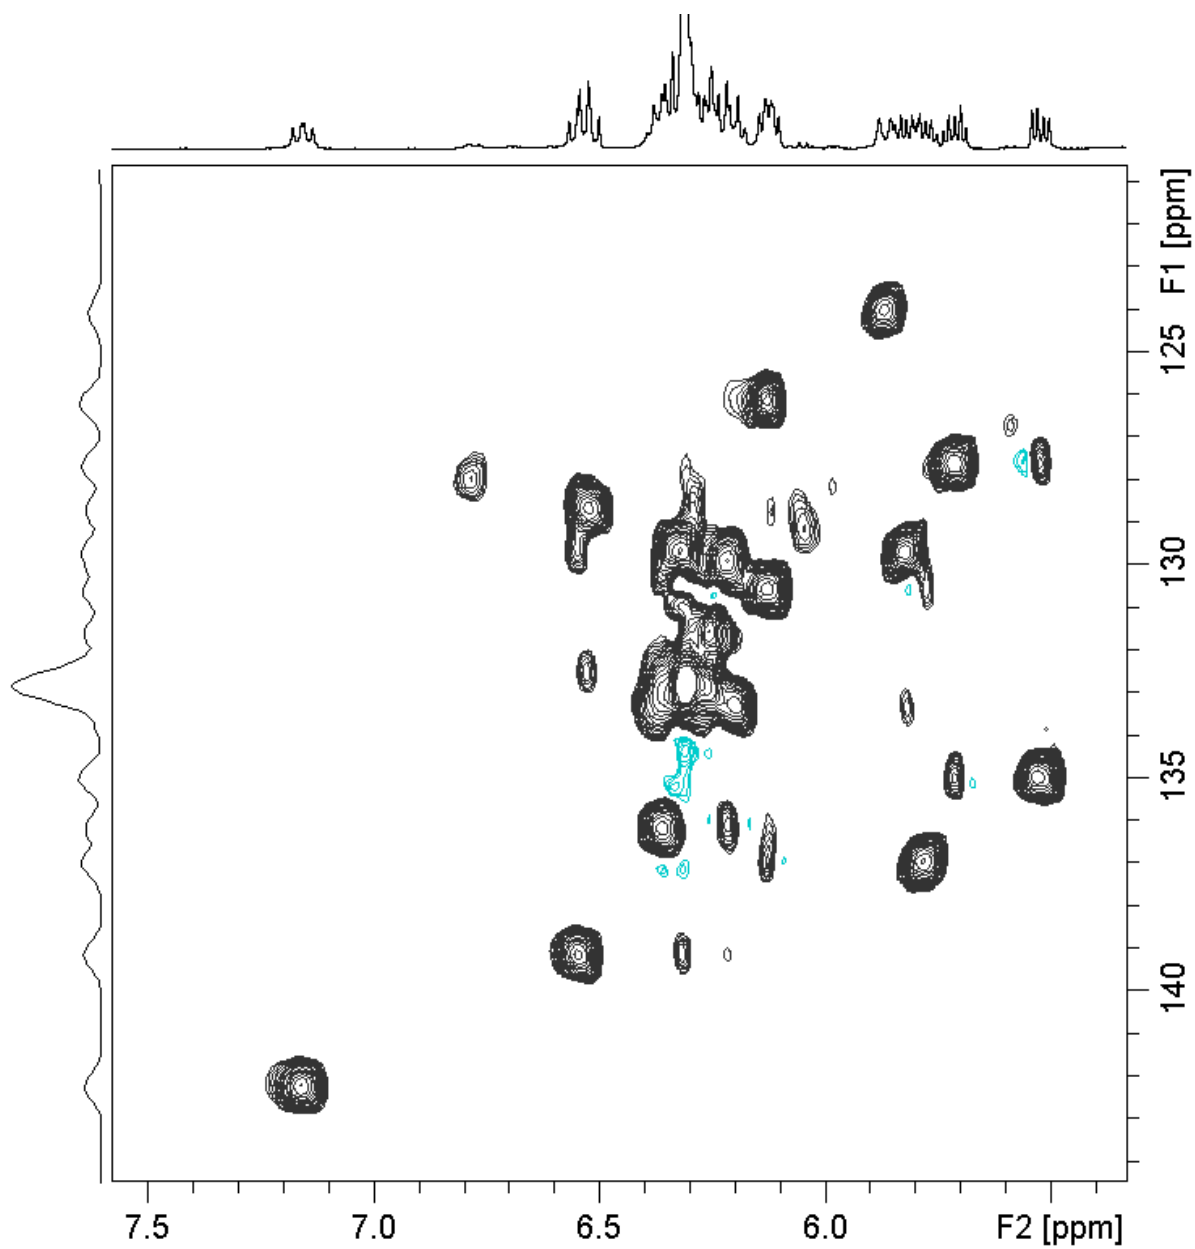

**FIG S39:** HSQC (600 MHz) spectrum of funisamine from *Streptosporangium* sp. KDCA35 in Methanol-d4 enlarged to show upfield couplings.

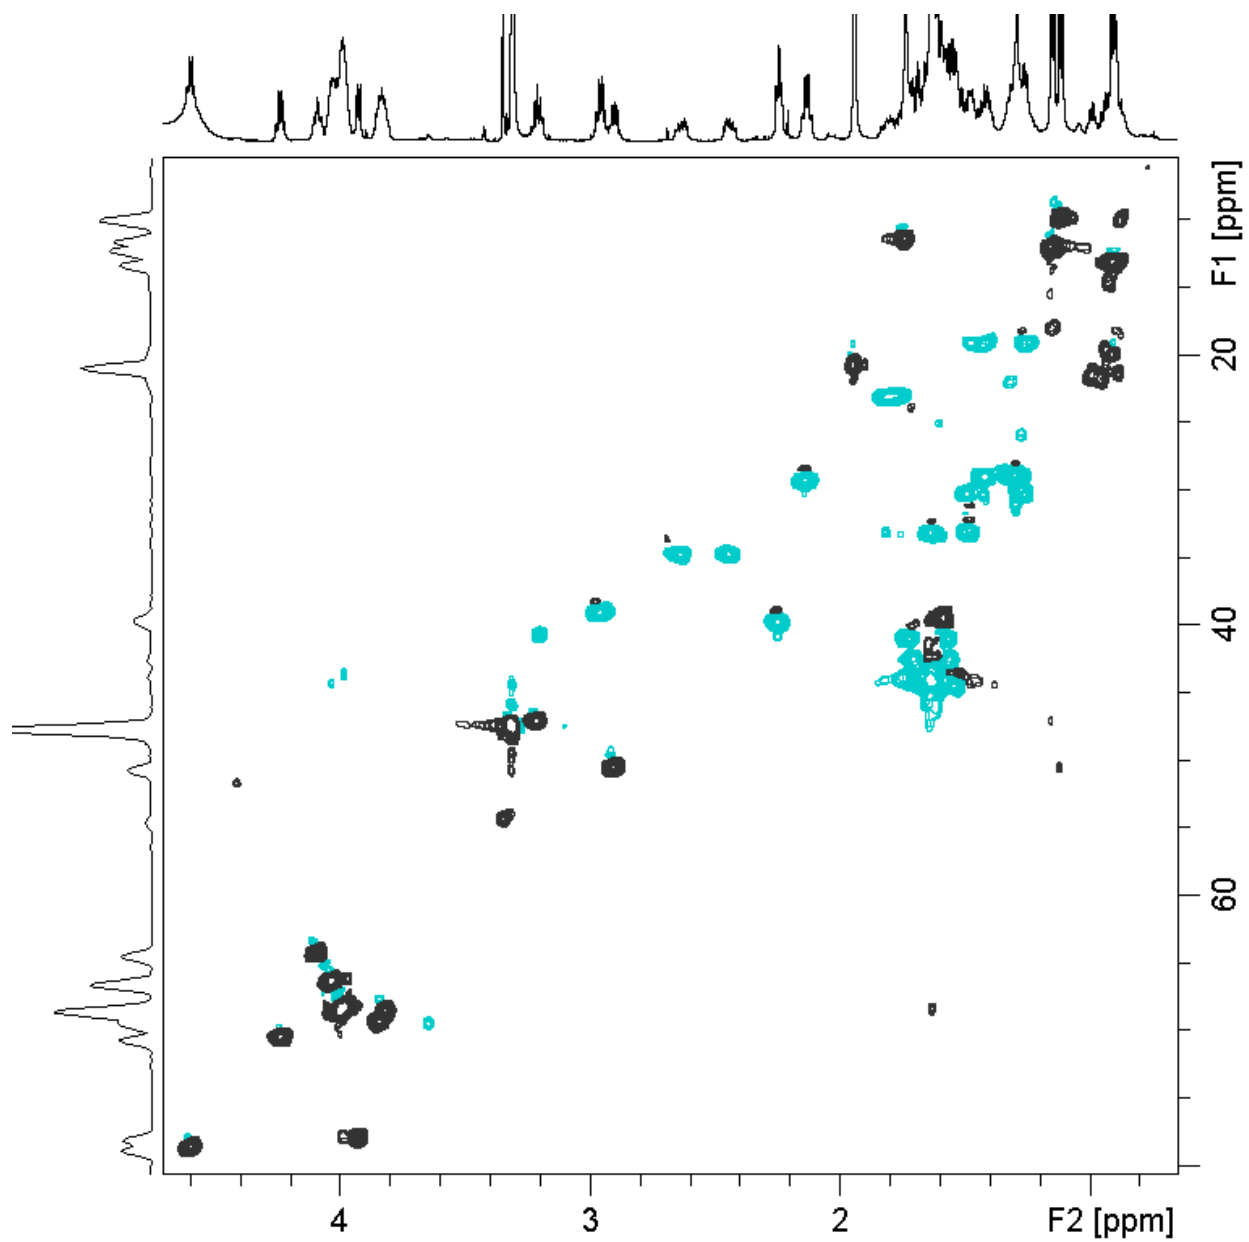

**FIG S40:** HMBC (600 MHz) spectrum of funisamine from *Streptosporangium* sp. KDCAGE35 in Methanol-d4

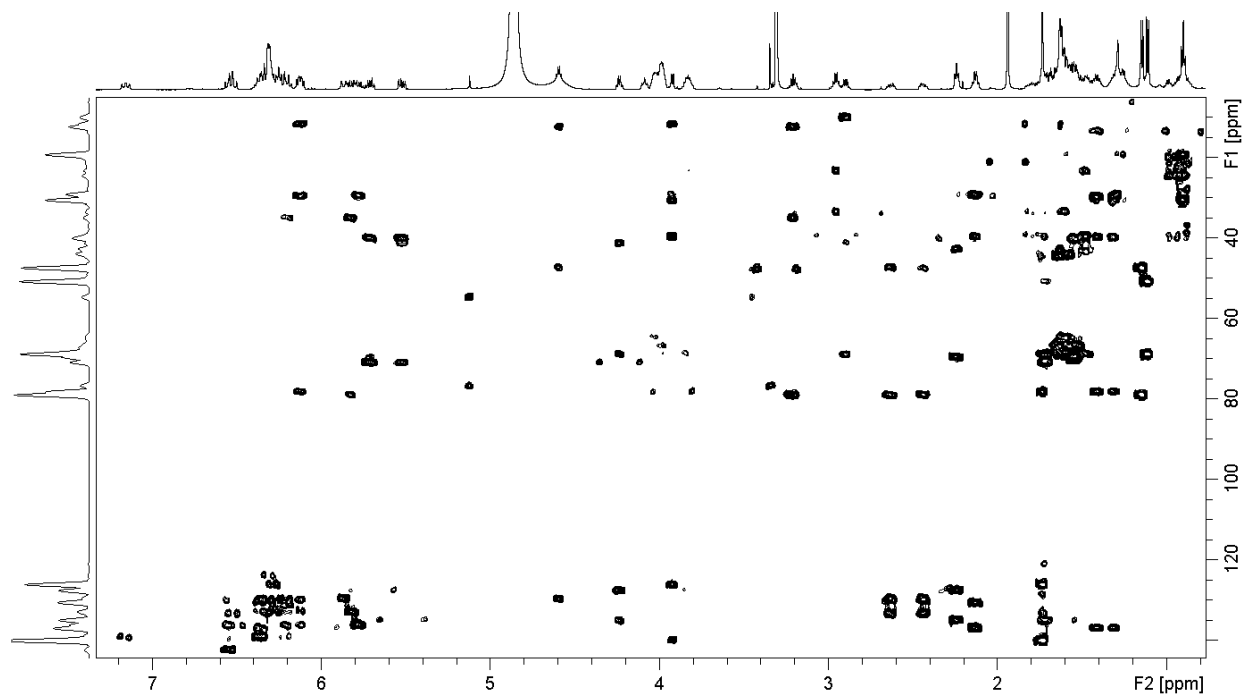

**FIG S41:** NOESY (600 MHz) spectrum of funisamine from *Streptosporangium* sp. (KDCAGE35) in Methanol-d4

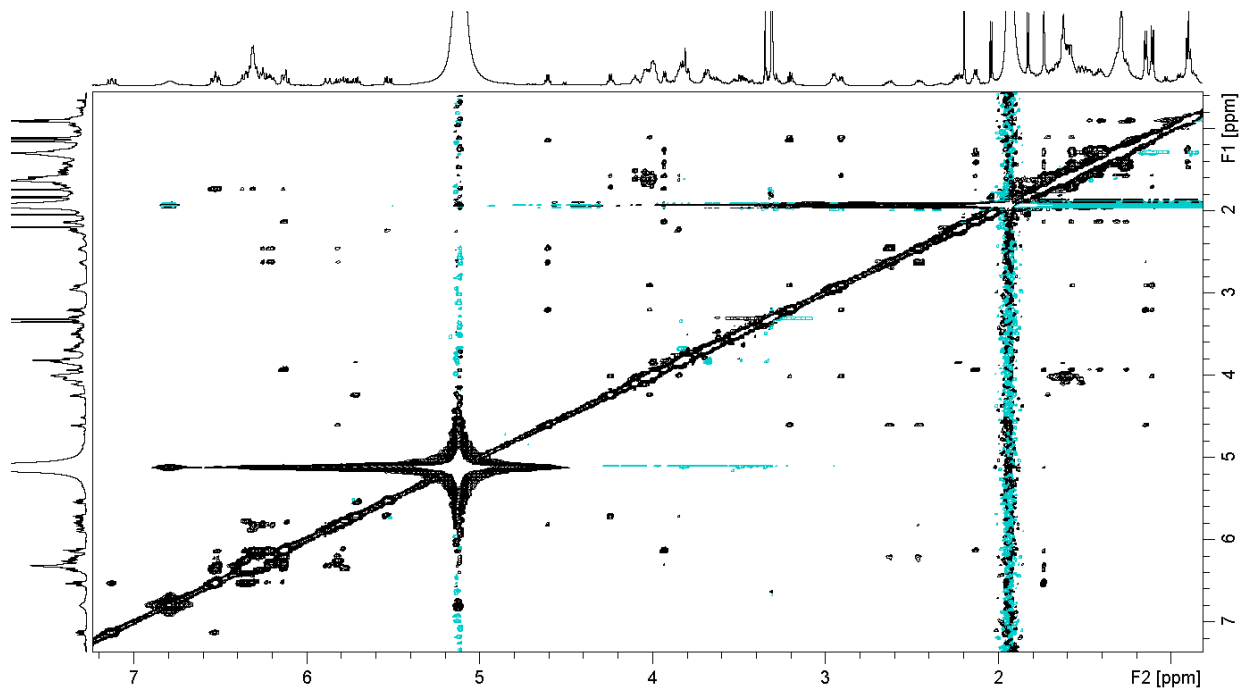

### B.3. High-resolution mass spectral data

**FIG S42:** High-Res mass spectrum for purified funisamine acquired in negative mode on a 15T solariX Fourier Transform Ion Cyclotron Resonance (FT-ICR) mass spectrometer (Bruker Daltonics, Billerica, MA, USA)

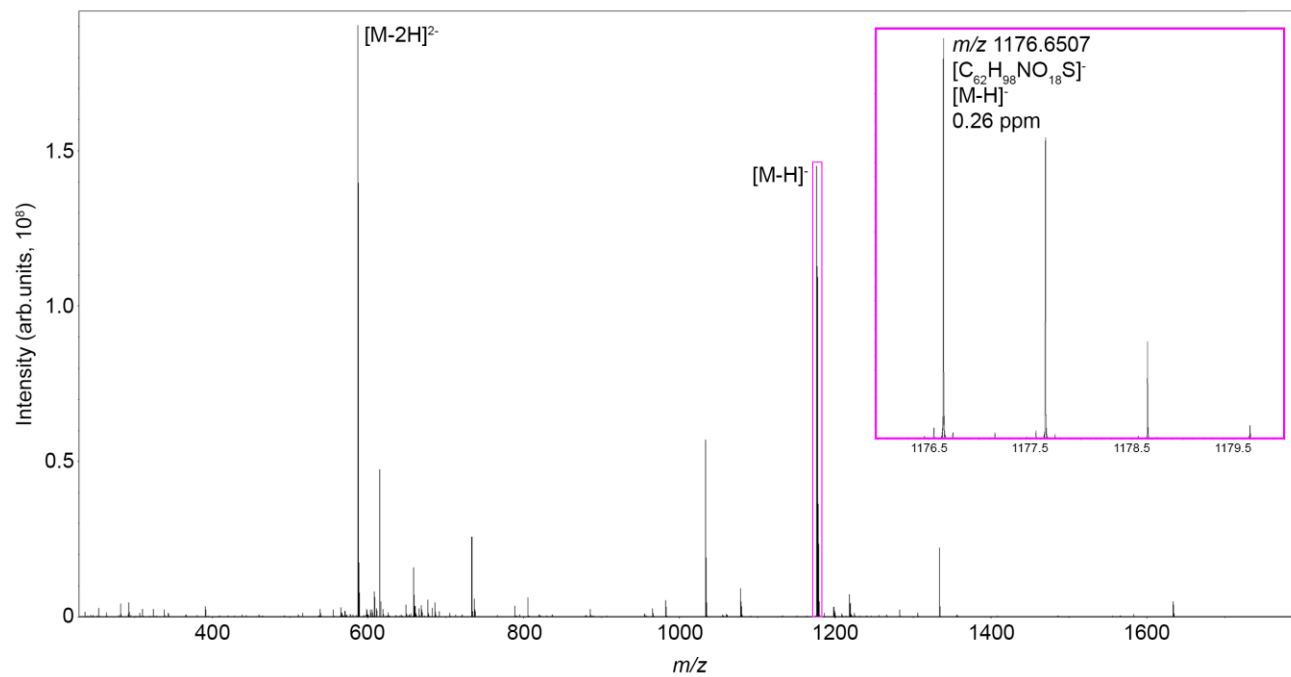

#### B.4. Fragmentation data

**Table S6:** Table of ions detected through fragmentation analysis of purified funisamine

| Observed m/z | Intensity | Molecular Formula | Theoretical m/z | Mass Accuracy (ppm) |
|--------------|-----------|-------------------|-----------------|---------------------|
| 1176.65095   | 6.84E+07  | C62H98NO18S-      | 1176.6510       | 0.05                |
| 1158.64094   | 1.52E+06  | C62H96NO17S-      | 1158.6404       | -0.47               |
| 1098.65309   | 5.97E+05  | UNK               |                 |                     |
| 1098.60508   | 9.70E+06  | C58H92NO18S-      | 1098.6041       | -0.93               |
| 1080.59553   | 7.35E+05  | C58H90NO17S-      | 1080.5935       | -1.88               |
| 1078.68607   | 7.53E+05  | C62H96NO14-       | 1078.6836       | -2.29               |
| 697.34181    | 6.43E+06  | C39H53O9S-        | 697.3416        | -0.30               |
| 679.33228    | 4.08E+05  | C39H51O8S-        | 679.3310        | -1.88               |
| 674.34418    | 3.56E+05  | C29H56NO14S-      | 674.3427        | -2.19               |
| 668.33516    | 1.03E+06  | C41H48O8-         | 668.3355        | 0.46                |
| 667.33181    | 9.67E+05  | C38H51O8S-        | 667.3310        | -1.21               |
| 639.29996    | 1.12E+06  | C36H47O8S-        | 639.2997        | -0.41               |
| 619.29486    | 3.81E+06  | C33H47O9S-        | 619.2946        | -0.42               |
| 589.34925    | 5.33E+05  | UNK               |                 |                     |
| 589.28417    | 4.51E+06  | C32H45O8S-        | 589.2841        | -0.19               |
| 588.34589    | 8.49E+05  | C37H48O6-         | 588.3456        | -0.42               |
| 588.26933    | 3.74E+05  | C24H46NO13S-      | 588.2695        | 0.36                |
| 570.25987    | 4.56E+05  | C24H44NO12S-      | 570.2590        | -1.58               |
| 561.25307    | 5.41E+05  | C30H41O8S-        | 561.2528        | -0.48               |
| 558.2599     | 2.53E+05  | C23H44NO12S-      | 558.2590        | -1.67               |
| 549.30256    | 3.05E+05  | C37H41O4-         | 549.3010        | -2.84               |
| 544.2437     | 6.34E+05  | C22H42NO12S-      | 544.2433        | -0.70               |
| 501.30079    | 3.55E+05  | C33H41O4-         | 501.3010        | 0.42                |
| 464.28649    | 2.41E+05  | C22H42NO9-        | 464.2865        | 0.02                |
| 457.31085    | 4.60E+05  | C32H41O2-         | 457.3112        | 0.77                |
| 446.2759     | 2.68E+05  | C22H40NO8-        | 446.2759        | 0.00                |
| 428.26553    | 2.59E+05  | C22H38NO7-        | 428.2654        | -0.30               |
| 394.24449    | 4.36E+05  | C18H36NO8-        | 394.2446        | 0.28                |
| 350.21822    | 7.26E+05  | C16H32NO7-        | 350.2184        | 0.51                |
| 317.20884    | 6.37E+05  | UNK               |                 |                     |
| 306.19217    | 1.24E+06  | C14H28NO6-        | 306.1922        | 0.13                |
| 262.16589    | 7.44E+05  | C12H24NO5-        | 262.1660        | 0.42                |
| 226.1448     | 2.21E+05  | C12H20NO3-        | 226.1449        | 0.44                |
| 209.04884    | 2.28E+05  | C7H13O5S-         | 209.0489        | 0.29                |
| 173.09714    | 3.45E+05  | C12H13O-          | 173.0972        | 0.35                |
| 147.08152    | 4.34E+05  | C10H11O-          | 147.0815        | -0.14               |
| 121.06587    | 4.40E+05  | C8H9O-            | 121.0659        | 0.25                |
| 96.9601      | 1.36E+07  | HSO4-             | 96.9601         | 0.00                |

**FIG S43:** Fragmentation spectra of isolated funisamine

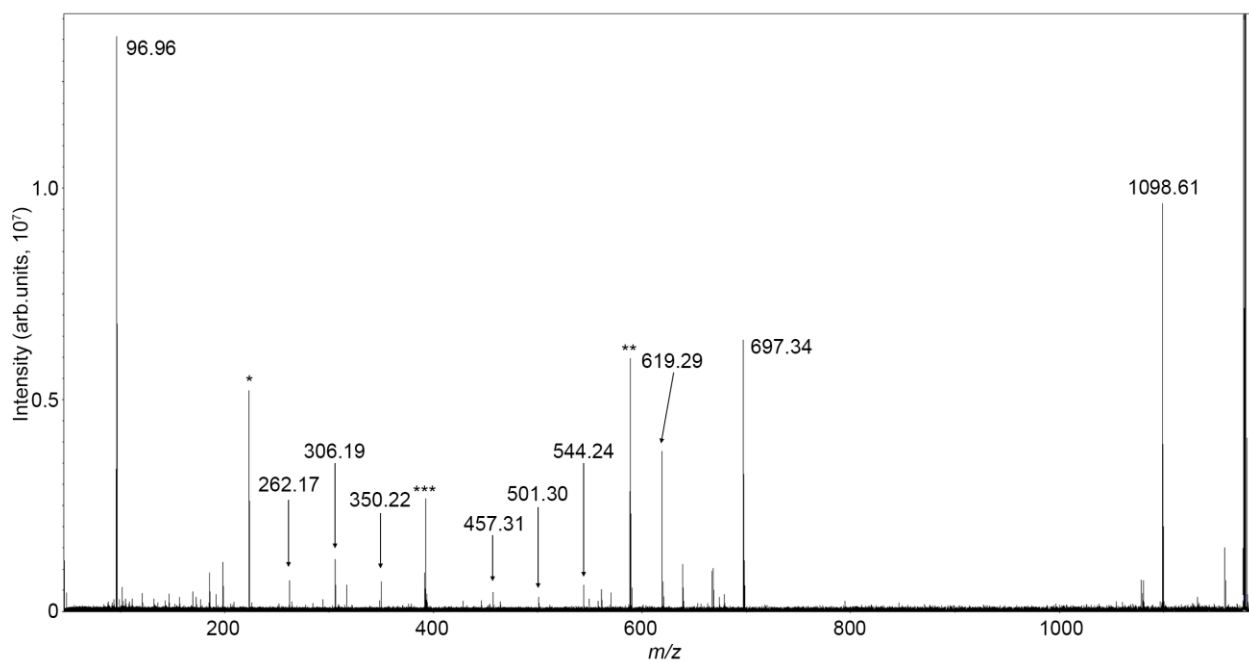

**FIG S44:** Fragmentation assignments for funisamine

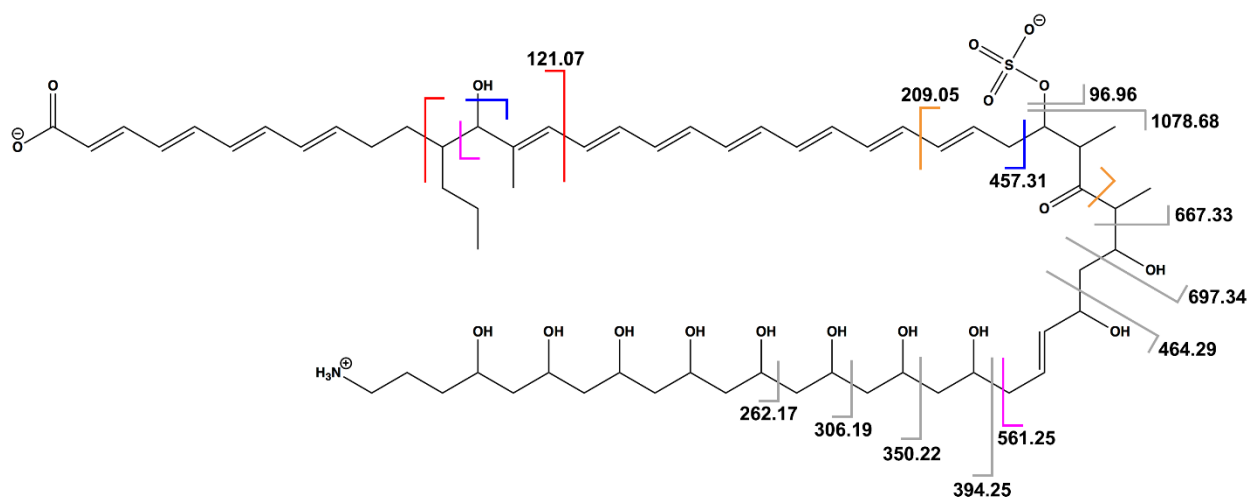



### B.5. Amicoumacin production in mixed culture

**FIG S45:** (A) S-plot prioritization of amicoumacin B and funisamine from mixed culture extract with *Streptosporangium* sp. KDCAGE35 and *B. subtilis*. Extracted ion chromatograms for labeled features are shown overlaid on the total ion chromatogram.

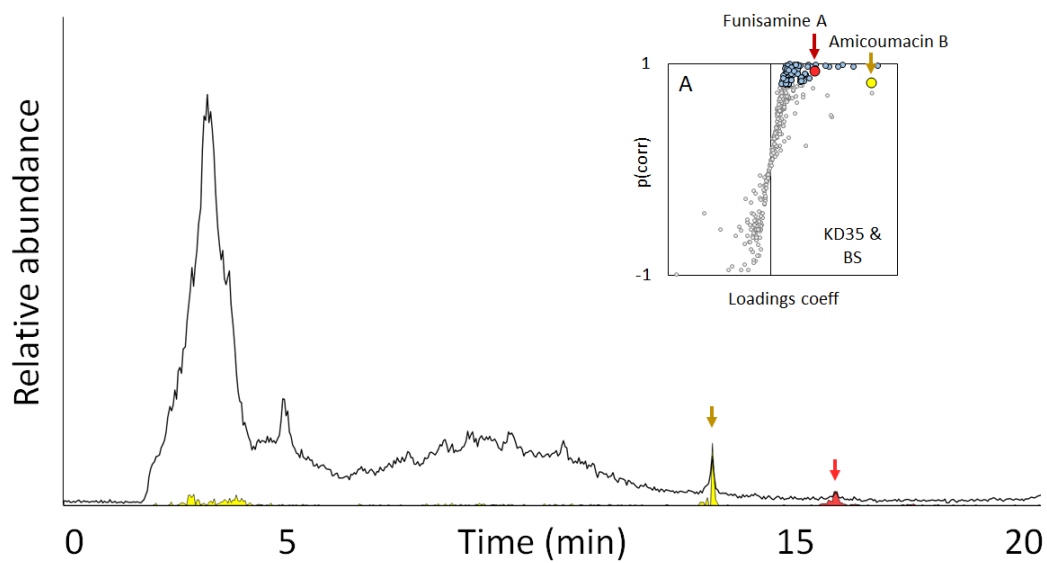

### B.6. Mixed culture competitor growth rates

**FIG S46:** Mixed culture competitor growth curves for *Tsukamurella pulmonis* (Tpu), *Rhodococcus* BBSNAI13 (Rwr), *Escherichia coli* (Eco), *Bacillus subtilis* (Bsu), and *Bacillus* KDCAGE13 (Bsi) in international Streptomyces protocol 2 (ISP2) broth. Doubling times in hours were calculated to be: 1.8 (Tpu), 2.8 (Rwr), 1.5 (Eco), 1.5 (Bsu), and 1.0 (Bsi).

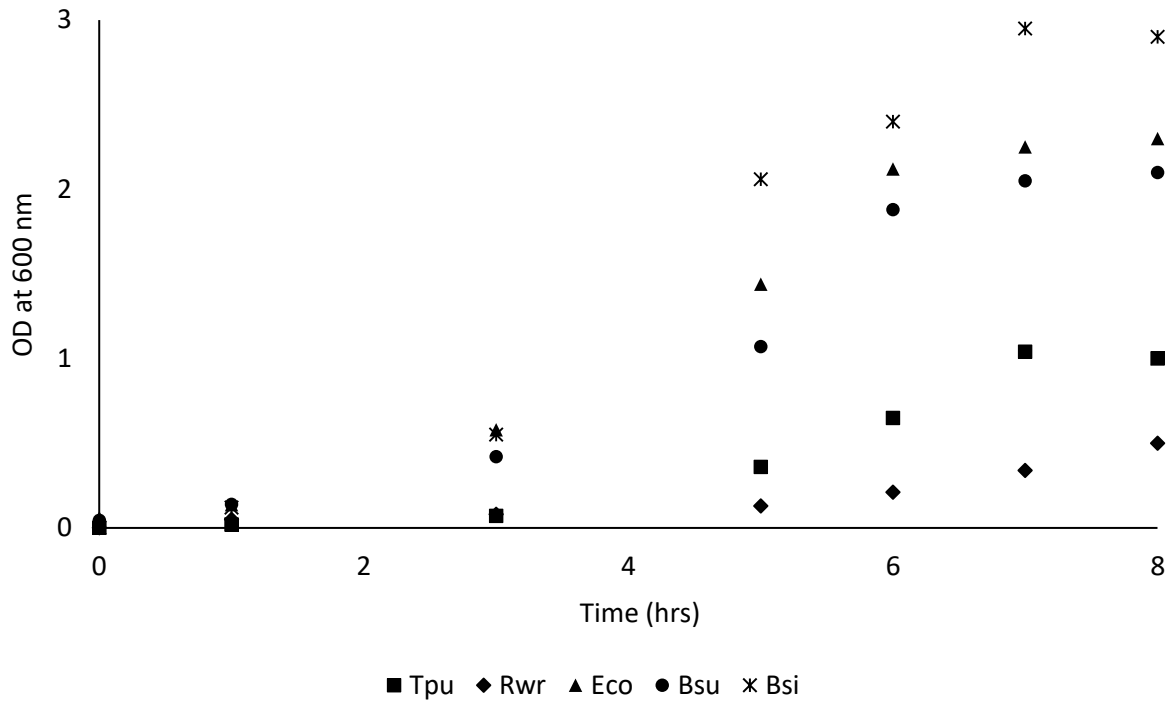

### C. 1. Putative NP gene clusters observed for *Streptosporangium* sp. KDCAGE35

**Table S7:** Table of putative biosynthetic gene clusters identified by antiSMASH in the genome of *Streptosporangium* sp. KDCAGE35

| Cluster    | Type          | Most similar known cluster from antiSMASH                                     |
|------------|---------------|-------------------------------------------------------------------------------|
| Cluster 1  | Lasso peptide | -                                                                             |
| Cluster 2  | Nrps          | Daptomycin_biosynthetic_gene_cluster (4% of genes show similarity)            |
| Cluster 3  | Nrps          | Landomycin_biosynthetic_gene_cluster (9% of genes show similarity)            |
| Cluster 4  | Nrps          | Naphthyridinomycin_biosynthetic_gene_cluster (17% of genes show similarity)   |
| Cluster 5  | Terpene       | Chlortetracycline_biosynthetic_gene_cluster (5% of genes show similarity)     |
| Cluster 6  | T3pks         | Alkylresorcinol_biosynthetic_gene_cluster (100% of genes show similarity)     |
| Cluster 7  | Nrps          | Scabichelin_biosynthetic_gene_cluster (100% of genes show similarity)         |
| Cluster 8  | Bacteriocin   | Hedamycin_biosynthetic_gene_cluster (6% of genes show similarity)             |
| Cluster 9  | Terpene       | Spinosad_biosynthetic_gene_cluster (8% of genes show similarity)              |
| Cluster 10 | T3pks-T1pks   | Kendomycin_biosynthetic_gene_cluster (55% of genes show similarity)           |
| Cluster 11 | Terpene       | Sioxanthin_biosynthetic_gene_cluster (40% of genes show similarity)           |
| Cluster 12 | Lantipeptide  | -                                                                             |
| Cluster 13 | Terpene       | Griseobactin_biosynthetic_gene_cluster (11% of genes show similarity)         |
| Cluster 14 | Other         | Monensin_biosynthetic_gene_cluster (5% of genes show similarity)              |
| Cluster 15 | Lantipeptide  | Catenulipeptin_biosynthetic_gene_cluster (60% of genes show similarity)       |
| Cluster 16 | Terpene-Nrps  | -                                                                             |
| Cluster 17 | T1pks         | Concanamycin_A_biosynthetic_gene_cluster (42% of genes show similarity)       |
| Cluster 18 | Terpene       | 9-methylstreptimidone_biosynthetic_gene_cluster (9% of genes show similarity) |
| Cluster 19 | Terpene       | Hopene_biosynthetic_gene_cluster (46% of genes show similarity)               |
| Cluster 20 | Siderophore   | -                                                                             |
| Cluster 21 | Bacteriocin   | -                                                                             |

## C.2. Putative NP gene cluster for production of funisamine in *Streptosporangium* sp. KDCAGE35

**Table S8:** Genetic organization of putative funisamine biosynthetic gene cluster in *Streptosporangium* sp. KDCAGE35.

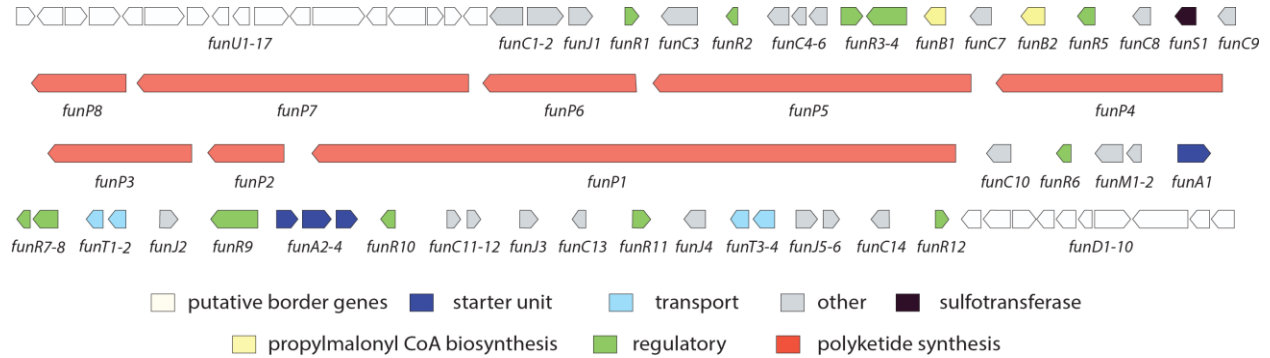

| GenBank accession # | Start/Stop (bp) | Protein | Size (AAs) | Proposed function    | Protein Homolog                                                                                                   | I / S (%) | Accession Number               |
|---------------------|-----------------|---------|------------|----------------------|-------------------------------------------------------------------------------------------------------------------|-----------|--------------------------------|
|                     | 2-679           | FunU1   | 225        | unknown              | Nucleoprotein TPR ( <i>Xenopus laevis</i> )                                                                       | 38 / 44   | <a href="#">Q5EE04.1</a>       |
|                     | 1239-40         | FunU2   | 399        | hypothetical protein | Hypothetical protein ( <i>Streptomyces</i> sp. PCS3-D2)                                                           | 58 / 63   | <a href="#">EYU65272.1</a>     |
|                     | 250-1275        | FunU3   | 343        | hydrolase            | Epoxide hydrolase B ( <i>Mycobacterium tuberculosis</i> CDC1551)                                                  | 39 / 51   | <a href="#">P95276.2</a>       |
|                     | 219-1817        | FunU4   | 532        | hypothetical protein | ---                                                                                                               | ----      | ---                            |
|                     | 2356-1277       | FunU5   | 359        | transporter          | Uncharacterized transporter YcbK ( <i>Bacillus subtilis</i> subsp. <i>subtilis</i> str. 168)                      | 27 / 43   | <a href="#">P42243.1</a>       |
|                     | 1295-3595       | FunU6   | 766        | hypothetical protein | ---                                                                                                               | ----      | ---                            |
|                     | 2418-3335       | FunU7   | 305        | regulator            | HTH-type transcriptional regulator GltC ( <i>Bacillus subtilis</i> subsp. <i>subtilis</i> str. 168)               | 27 / 46   | <a href="#">P20668.3</a>       |
|                     | 3599-2832       | FunU8   | 255        | regulator            | LysR family transcriptional regulator ( <i>Nonomuraea jiangxiensis</i> )                                          | 41 / 52   | <a href="#">WP_090940584.1</a> |
|                     | 4339-3608       | FunU9   | 243        | hypothetical protein | Hypothetical protein ( <i>Ralstonia mannitolilytica</i> )                                                         | 40 / 58   | <a href="#">AJW47704.1</a>     |
|                     | 3702-5567       | FunU10  | 621        | phosphatase          | Alkaline phosphatase D ( <i>Bacillus subtilis</i> subsp. <i>subtilis</i> str. 168)                                | 45 / 60   | <a href="#">P42251.3</a>       |
|                     | 4817-3750       | FunU11  | 355        | hypothetical protein | ---                                                                                                               | ----      | ---                            |
|                     | 4823-7591       | FunU12  | 922        | galactosidase        | alpha-galactosidase ( <i>Streptomyces alboflavus</i> )                                                            | 45 / 58   | <a href="#">WP_087883000.1</a> |
|                     | 5675-4848       | FunU13  | 275        | unknown              | hypothetical protein STAWA0001_0347 ( <i>Staphylococcus warneri</i> L37603)                                       | 42 / 47   | <a href="#">EEQ79474.1</a>     |
|                     | 7555-5483       | FunU14  | 690        | hypothetical protein | Hypothetical protein SCLAV_2787 [ <i>Streptomyces clavuligerus</i> ATCC 27064]                                    | 39 / 45   | <a href="#">EFG07859.1</a>     |
|                     | 5698-6303       | FunU15  | 201        | kinase               | 4-diphosphocytidyl-2-C-methyl-D-erythritol kinase ( <i>Photorhabdus luminescens</i> subsp. <i>laumondii</i> TTO1) | 32 / 50   | <a href="#">Q7N589.1</a>       |

|               |        |      |                                      |                                                                                                 |         |                            |
|---------------|--------|------|--------------------------------------|-------------------------------------------------------------------------------------------------|---------|----------------------------|
| 8036-8707     | FunU16 | 223  | monooxygenase                        | Pyrimidine monooxygenase RutA ( <i>Bradyrhizobium sp. BTAi1</i> )                               | 41 / 59 | <a href="#">A5EB33.1</a>   |
| 10043-8868    | FunU17 | 391  | hypothetical protein                 | ---                                                                                             | ----    | ---                        |
| 10707-9010    | FunC1  | 565  | tRNA ligase                          | Cysteine--tRNA ligase ( <i>Salmonella enterica subsp. arizonae serovar</i> )                    | 29 / 43 | <a href="#">A9MLA7.1</a>   |
| 9112-11118    | FunC2  | 668  | 4'-phosphopantetheinyl transferase   | 4'-phosphopantetheinyl transferase AcpS ( <i>Dechloromonas aromatica RCB</i> )                  | 52 / 62 | <a href="#">Q47EF3.1</a>   |
| 9285-10616    | FunJ1  | 443  | hypothetical protein                 | ---                                                                                             | ----    | ---                        |
| 12099 - 12629 | FunR1  | 176  | RNA polymerase sigma-F factor        | RNA polymerase sigma-F factor ( <i>Bacillus megaterium</i> )                                    | 54 / 75 | <a href="#">P35145.1</a>   |
| 14530-12644   | FunC3  | 628  | Phospholipase                        | Non-hemolytic phospholipase C ( <i>Burkholderia pseudomallei K96243</i> )                       | 37 / 48 | <a href="#">Q9RGS8.2</a>   |
| 15321-15016   | FunR2  | 101  | regulator                            | Outer membrane protein assembly factor BamA ( <i>Helicobacter pylori 26695</i> )                | 43 / 60 | <a href="#">O25369.1</a>   |
| 16441-15506   | FunC4  | 311  | dehydrogenase                        | Sterol-4-alpha-carboxylate 3-dehydrogenase, decarboxylating ( <i>Dictyostelium discoideum</i> ) | 29 / 44 | <a href="#">Q54L85.1</a>   |
| 17220-16597   | FunC5  | 207  | reductase                            |                                                                                                 |         |                            |
| 18172-17438   | FunC6  | 244  | oxidoreductase                       | oxidoreductase YkvO ( <i>Bacillus subtilis subsp. subtilis str. 168</i> )                       | 51 / 70 | <a href="#">O31680.1</a>   |
| 18436 - 19335 | FunR3  | 299  | regulator                            | Hca operon transcriptional activator HcaR ( <i>Escherichia coli K-12</i> )                      | 40 / 55 | <a href="#">Q47141.2</a>   |
| 21794-19701   | FunR4  | 697  | elongation factor G                  | Elongation factor G ( <i>Streptomyces coelicolor A3(2)</i> )                                    | 81 / 87 | <a href="#">O87844.1</a>   |
| 23211-22279   | FunB1  | 310  | 3-hydroxypentyl-CoA dehydrogenase    | 3-hydroxybutyryl-CoA dehydrogenase ( <i>Mycobacterium tuberculosis CDC1551</i> )                | 56 / 72 | <a href="#">P9WNP6.1</a>   |
| 24197-23208   | FunC7  | 329  | ketoacyl-ACP synthase III            | Acetoacetyl CoA synthase NphT7 ( <i>Streptomyces sp. CL190</i> )                                | 52 / 65 | <a href="#">D7URV0.1</a>   |
| 25546-24200   | FunB2  | 448  | 2-pentenyl-CoA carboxylase/reductase | Crotonyl-CoA reductase ( <i>Streptomyces collinus</i> )                                         | 52 / 65 | <a href="#">Q53865.1</a>   |
| 26373-25579   | FunR5  | 264  | regulator                            | Sugar fermentation stimulation protein homolog ( <i>Pyrobaculum calidifontis JCM 11548</i> )    | 60 / 72 | <a href="#">A3MSH9.1</a>   |
| 27129-26458   | FunC8  | 223  | 4'-phosphopantetheinyl transferase   | 4'-phosphopantetheinyl transferase Npt ( <i>Nocardia iowensis</i> )                             | 49 / 62 | <a href="#">A1YCA5.1</a>   |
| 28178-27129   | FunS1  | 349  | sulfotransferase                     | sulfotransferase associated with clethramycin BGC ( <i>Streptomyces malaysiensis</i> )          | 44 / 59 | <a href="#">ATL82931.1</a> |
| 28945-28175   | FunC9  | 256  | Thioesterase                         | Thioesterase PikA5 ( <i>Streptomyces venezuelae</i> )                                           | 52 / 66 | <a href="#">Q9ZG11.1</a>   |
| 34875-28942   | FunP8  | 1977 | funisamine PKS 8                     | ---                                                                                             | ----    | ---                        |
| 56330-34905   | FunP7  | 7181 | funisamine PKS 7                     | ---                                                                                             | ----    | ---                        |
| 66246-56476   | FunP6  | 3256 | funisamine PKS 6                     | ---                                                                                             | ----    | ---                        |
| 86928-66277   | FunP5  | 6883 | funisamine PKS 5                     | ---                                                                                             | ----    | ---                        |
| 101612-86958  | FunP4  | 4884 | funisamine PKS 4                     | ---                                                                                             | ----    | ---                        |

|               |        |       |                                             |                                                                                                      |         |                              |
|---------------|--------|-------|---------------------------------------------|------------------------------------------------------------------------------------------------------|---------|------------------------------|
| 110910-101770 | FunP3  | 3046  | funisamine PKS 3                            | ---                                                                                                  | ----    | ---                          |
| 115796-111198 | FunP2  | 1532  | funisamine PKS 2                            | ---                                                                                                  | ----    | ---                          |
| 158396-116280 | FunP1  | 14038 | funisamine PKS 1                            | ---                                                                                                  | ----    | ---                          |
| 160153-158831 | FunC10 | 440   | FAD-dependent monooxygenase                 | FAD-dependent monooxygenase cctM ( <i>Talaromyces islandicus</i> )                                   | 27 / 40 | <a href="#">A0A0U1LQD9.1</a> |
| 160696-160202 | FunR6  | 164   | PadR family transcriptional regulator       | Transcriptional regulator PadR-like family protein ( <i>Nonomuraea jiangxiensis</i> )                | 89 / 96 | <a href="#">SDK84512.1</a>   |
| 162531-160984 | FunM1  | 515   | membrane protein                            | UPF0699 transmembrane protein YdbT ( <i>Bacillus subtilis</i> subsp. <i>subtilis</i> str. 168)       | 16 / 39 | <a href="#">A7RHG8.1</a>     |
| 162953-162528 | FunM2  | 141   | membrane protein                            | UPF0699 transmembrane protein YdbS ( <i>Bacillus subtilis</i> subsp. <i>subtilis</i> str. 168)       | 32 / 52 | <a href="#">P96615.1</a>     |
| 163265-164947 | FunA1  | 560   | arginine 2-monooxygenase                    | arginine 2-monooxygenase ( <i>Streptomyces malaysiensis</i> )                                        | 67 / 75 | <a href="#">ATL82933.1</a>   |
| 165743-165120 | FunR7  | 207   | regulator                                   | Response regulator protein VraR ( <i>Staphylococcus aureus</i> subsp. <i>aureus</i> MSSA476)         | 44 / 65 | <a href="#">Q6G850.1</a>     |
| 166951-165740 | FunR8  | 403   | signal transduction histidine kinase        | Sensor histidine kinase LiaS ( <i>Bacillus subtilis</i> subsp. <i>subtilis</i> str. 168)             | 30 / 49 | <a href="#">O32198.1</a>     |
| 167778-166909 | FunT1  | 289   | transport permease                          | transport permease ycf38 ( <i>Porphyra purpurea</i> )                                                | 27 / 47 | <a href="#">P51321.1</a>     |
| 168620-167775 | FunT2  | 281   | ABC transporter ATP-binding protein         | ABC transporter ATP-binding protein Yvfr ( <i>Bacillus subtilis</i> subsp. <i>subtilis</i> str. 168) | 38 / 56 | <a href="#">O07016.1</a>     |
| 168756-169583 | FunJ2  | 275   | hypothetical protein                        | hypothetical protein STAWA0001_0347 ( <i>Staphylococcus warneri</i> L37603)                          | 42 / 47 | <a href="#">EEQ79474.1</a>   |
| 172413-169660 | FunR9  | 917   | transcriptional regulator                   | HTH-type transcriptional regulator MalT ( <i>Vibrio campbellii</i> ATCC BAA-1116)                    | 25 / 41 | <a href="#">A7N5N6.1</a>     |
| 173031-174149 | FunA3  | 372   | agmatinase                                  | agmatinase ( <i>Streptomyces</i> sp. <i>Mg1</i> )                                                    | 34 / 52 | <a href="#">AKL64821.1</a>   |
| 174191-175633 | FunA2  | 480   | 4-guanidinobutanoate CoA ligase             | 4-guanidinobutanoate:CoA ligase ( <i>Streptomyces malaysiensis</i> )                                 | 61 / 73 | <a href="#">ATL87716.1</a>   |
| 175630-176556 | FunA4  | 308   | 4-guanidinobutanoyl-CoA:ACP acyltransferase | 4-guanidinobutanoyl-CoA:ACP acyltransferase ( <i>Streptomyces malaysiensis</i> )                     | 48 / 65 | <a href="#">ATL87717.1</a>   |
| 177375-176761 | FunR10 | 204   | TetR family transcriptional regulator       | Tetracycline repressor protein class E ( <i>Escherichia coli</i> )                                   | 25 / 44 | <a href="#">P21337.1</a>     |
| 177445-178020 | FunC11 | 191   | alkyl hydroperoxide reductase               | alkyl hydroperoxide reductase ( <i>Streptomyces violaceusniger</i> Tu 4113)                          | 70 / 79 | <a href="#">AEM81606.1</a>   |
| 178215-178826 | FunC12 | 203   | dehydrogenase                               | Malate dehydrogenase ( <i>Bacillus cytotoxicus</i> NVH 391-98)                                       | 30 / 44 | <a href="#">A7GQJ9.1</a>     |
| 178877-178080 | FunJ3  | 265   | hypothetical protein                        | ---                                                                                                  | ----    | ---                          |
| 178197-178826 | FunC13 | 209   | dehydrogenase                               | Malate dehydrogenase ( <i>Geobacillus</i> sp. <i>WCH70</i> )                                         | 29 / 51 | <a href="#">C5DAE0.1</a>     |
| 179363-180136 | FunR11 | 257   | regulator                                   | HTH-type transcriptional regulator CueR ( <i>Escherichia coli</i> O157:H7)                           | 33 / 55 | <a href="#">Q8XD09.1</a>     |
| 181146-180160 | FunJ4  | 328   | hypothetical protein                        | ---                                                                                                  | ----    | ---                          |
| 181118-180276 | FunT3  | 280   | transporter                                 | ABC-2 family transporter protein ( <i>Streptosporangium subroseum</i> )                              | 94 / 96 | <a href="#">SNT45499.1</a>   |
| 182104-181115 | FunT4  | 329   | transporter                                 | ABC transporter ATP-binding protein Yhch ( <i>Bacillus subtilis</i> subsp. <i>subtilis</i> str. 168) | 35 / 55 | <a href="#">P54592.1</a>     |

|               |        |     |                           |                                                                                                     |         |                                |
|---------------|--------|-----|---------------------------|-----------------------------------------------------------------------------------------------------|---------|--------------------------------|
| 181118-182110 | FunJ5  | 330 | hypothetical protein      | hypothetical protein STEPF1_06867 ( <i>Streptomyces</i> sp. F-1)                                    | 39 / 49 | <a href="#">SFY53584.1</a>     |
| 181188-181880 | FunJ6  | 230 | hypothetical protein      | hypothetical protein BJF79_17010 ( <i>Actinomadura</i> sp. CNU-125)                                 | 57 / 65 | <a href="#">OLT19263.1</a>     |
| 183592-182798 | FunC14 | 264 | ketoreductase             | Beta-ketoacyl-ACP reductase ( <i>Vibrio cholerae</i> O1 biovar El Tor str. N16961)                  | 36 / 52 | <a href="#">Q9KQH7.2</a>       |
| 183770-184417 | FunR12 | 215 | regulator                 | HTH-type transcriptional regulator YhgD ( <i>Bacillus subtilis</i> subsp. <i>subtilis</i> str. 168) | 38 / 59 | <a href="#">P32398.1</a>       |
| 184483-183782 | FunD1  | 233 | hypothetical protein      | ---                                                                                                 | ----    | ---                            |
| 185811-184630 | FunD2  | 393 | methylase                 | Serine methylase ( <i>Thermus thermophilus</i> HB27)                                                | 26 / 45 | <a href="#">Q72IH2.2</a>       |
| 184870-185931 | FunD3  | 353 | phosphoribosyltransferase | anthranilate phosphoribosyltransferase ( <i>Streptomyces</i> sp. M1013)                             | 29 / 47 | <a href="#">WP_076976541.1</a> |
| 187265-186549 | FunD4  | 238 | peptide hydrolase         | ATP-dependent Clp protease proteolytic subunit 1 ( <i>Nocardia farcinica</i> IFM 10152)             | 73 / 86 | <a href="#">Q5Z0M4.1</a>       |
| 187822-187136 | FunD5  | 228 | peptide hydrolase         | ATP-dependent Clp protease proteolytic subunit 3 ( <i>Streptomyces coelicolor</i> A3(2))            | 48 / 66 | <a href="#">Q9X7R9.1</a>       |
| 188692-188066 | FunD6  | 208 | hypothetical protein      | ---                                                                                                 | ----    | ---                            |
| 188726-190639 | FunD7  | 637 | hypothetical protein      | ---                                                                                                 | ----    | ---                            |
| 191317-188747 | FunD8  | 856 | Membrane protein          | Outer membrane protein assembly factor BamB ( <i>Vibrio fischeri</i> ES114)                         | 31 / 45 | <a href="#">Q5E769.1</a>       |
| 189953-189270 | FunD9  | 227 | hypothetical protein      | ---                                                                                                 | ----    | ---                            |
| 191234-190353 | FunD10 | 293 | Iron permease             | putative iron permease FTR1 [ <i>Mycobacterium abscessus</i> 47J26]                                 | 40 / 49 | <a href="#">EHB98808.1</a>     |

**C.3. Ketoreductase domain stereochemical prediction analysis of putative funisamine gene cluster in *Streptosporangium* sp. KDCAGE35**

**FIG S47:** Ketoreductase multiple sequence alignment to designate KR-type for stereochemistry predictions. The KR-types are distinguished in accordance with the five highlighted columns showing the 'fingerprint' amino acids. Group A1 is distinguished by no LDD in column 1, W in column 2, and no H in column 3. Group A2 is distinguished by no LDD in 1, W in 2, and H in 3. Group B1 is distinguished by LDD in 1 and no P in 5. Group B2 is distinguished by LDD in 1 and P in 5. Group C1 is distinguished by no Y in 4, and group C2 is distinguished by N in 6.

|       |                          | 1         |               |     |                           |     |   |   |   |                           |                              |     |
|-------|--------------------------|-----------|---------------|-----|---------------------------|-----|---|---|---|---------------------------|------------------------------|-----|
| Fun1e | CDLTDRSAVATLVREFDGE      | ---       | DLAIVHAAGV    | LDD | GVIAGLDPARLDAVLASKAGAAWQ  | 112 |   |   |   |                           |                              |     |
| Fun3a | CDLADRAAVEALLASV         | ----      | GTVDVVHAAGV   | GAN | VFPDQTDVALVERLLAGKVAGAVN  | 114 |   |   |   |                           |                              |     |
| Fun2a | CDLSDRSAVEALLADV         | ----      | GEVDVVHAAGV   | SQD | VPLAAEDADHLRAVAAGKVDGAAH  | 110 |   |   |   |                           |                              |     |
| Fun1f | CDLADRSERVEALLDTV        | ----      | GDVDVVHAAGV   | VED | VPLADADQAHLDRVIRGKVDGALH  | 110 |   |   |   |                           |                              |     |
| Fun1c | CDLADRSERVEALLATI        | ----      | GQVNAVVHAAGV  | GED | VALVDADEEHLRRVVGKVDGALH   | 110 |   |   |   |                           |                              |     |
| Fun1g | CDLADRSERVEGLLATI        | ----      | GQVNAVVHAAGV  | SEH | AALTDVDEEHLRRVVVGKVDGALH  | 110 |   |   |   |                           |                              |     |
| Fun1d | CDLADPSAVEGLLATI         | ----      | GQVDVVHAAGV   | AED | AELVDADAHLNRRVLSGKVDGALY  | 110 |   |   |   |                           |                              |     |
| Fun1h | CDLADRSERVEGLLATI        | ----      | GQVNAVVHAAGV  | AED | VELVDADAHLNRRVLSGKVDGALH  | 110 |   |   |   |                           |                              |     |
| Fun1a | CDLADRSERVEALLAVV        | ----      | GAVDAVVHAAGV  | GED | AELVEADAHLNRRVLSGKVDGASH  | 110 |   |   |   |                           |                              |     |
| Fun12 | CDLADRSERVEALLAVV        | ----      | GAVDAVVHAAGV  | AAD | VPLRDADEAHFRTVLSGKVDGALH  | 110 |   |   |   |                           |                              |     |
| Fun6b | CDTADRAQVAALLAGL         | ----      | PEPVTAVVHAAGT | LTF | VLLADSTPEELADVRSRGKVEGAVH | 115 |   |   |   |                           |                              |     |
| Fun3b | CDLADRDQVAALVADL         | ----      | PADLTAVVHAAGV | QD  | TPIADLTAAETAAVTGARVTGTL   | 115 |   |   |   |                           |                              |     |
| Fun4a | TDLADRDAVAALLKEATADPEAPL | TAVVHAAGI | AHS           | A   | PLADLDAAGLASVLAGKTTGALH   | 119 |   |   |   |                           |                              |     |
| Fun1i | ADVADRAALASVLAELIPA      | --        | EHPLTAVVHTAGV | LAD | GIVERMTPDQLDRVMRPKVDGALH  | 114 |   |   |   |                           |                              |     |
| Fun7a | CDVADRDDLDRVLD           | -----     | GVDVRAVVHVAGV | LDD | TVLTGLTPDRLDAVLRKVDVAVN   | 114 |   |   |   |                           |                              |     |
| Fun5d | CDLADPAAVQRLIG           | -----     | PVEVGAVLHAAGS | TDD | AMLSLTPDRLASVLAAKVDAAVN   | 114 |   |   |   |                           |                              |     |
| Fun6a | CDVTDPEAVEAALR           | -----     | GVTVSAVFHAGV  | LDD | GLLADLTPDRLDAVLRPKADAVVN  | 104 |   |   |   |                           |                              |     |
| Fun7b | CDLADAGAVAGALR           | -----     | DEPVTAVIHAAGV | LDD | ALLDTPERLRAVFRKVDAAVN     | 110 |   |   |   |                           |                              |     |
| Fun4b | CDLSDAGAVMAALR           | -----     | DEPVSADVHAAGV | IDD | GLLDTPERLDTVFRKVDAAARN    | 104 |   |   |   |                           |                              |     |
| Fun4c | CDVSDADALTAALR           | -----     | DEPVTAVIHAAGV | LDD | GTLESPTERLDAVFRKVDAAARN   | 108 |   |   |   |                           |                              |     |
| Fun8a | CDVADAAALTAALR           | -----     | DEPVTAVIHVAGV | LDD | GLLDTPARLDTVFRKVDAAARN    | 108 |   |   |   |                           |                              |     |
| Fun5c | CDVADAGAVTEALR           | -----     | GESVSAVIHAAGV | LDD | GMIESLTPERLDTVFRKIDAVRA   | 104 |   |   |   |                           |                              |     |
| Fun7c | CDVADAGAVAEALR           | -----     | GESVSAVVHAAGV | LDD | ALLADLTPERLDTVFRKVDAAARN  | 104 |   |   |   |                           |                              |     |
| Fun7d | CDVADAGAVAEALR           | -----     | GEPVSAVIHAAGV | LDD | ALLADLTPERLDTVFRKIDAAARN  | 108 |   |   |   |                           |                              |     |
| Fun5a | CDVADAGAVAAALR           | -----     | DEPVTAVIHAAGV | LDD | GTLESPTERLDTVFRKVDAAARN   | 108 |   |   |   |                           |                              |     |
| Fun5b | CDVSDAVAVTAALR           | -----     | DESVSAVIHAAGV | LDD | ALLADLTPERLRTVFRKVDAAARN  | 108 |   |   |   |                           |                              |     |
|       |                          |           | 2             | 3   | 4                         | 5   | 6 |   |   |                           |                              |     |
| Fun1e | LHELTEHRPLSAFVLFSS       | STAGV     | FGNPG         | Q   | A                         | Y   | A | A | A | AALDALAEYRKVLGLPATSIAWGPW | 172                          |     |
| Fun3a | LDALVGD--VDAFVTFSS       | LSGV      | WGSQ          | S   | H                         | A   | Y | A | V | A                         | AALDALAEQRRARGGAMTAIAWGSW    | 172 |
| Fun2a | LDALLPD--VP-LIVFSS       | IAGV      | WGSAE         | Q   | A                         | A   | Y | A | A | A                         | AALDALIARRRARGRPGTAVAWGPW    | 167 |
| Fun1f | LDALVGD--VDAFVVFSS       | ISAT      | WGSGR         | Q   | A                         | A   | Y | G | A | A                         | ANTALDGLILRRRAAGLPGTIAWGPW   | 168 |
| Fun1c | LDALVGD--VDAFVVFSS       | ISGI      | WGSAE         | Q   | T                         | A   | Y | G | A | A                         | AALDALIARRRASGLPGTAVAWGPW    | 168 |
| Fun1g | LDALVGD--VDAFVVFSS       | ISGI      | WGSAE         | Q   | A                         | A   | Y | G | A | A                         | AALDALIARRRASGLPGTAVAWGPW    | 168 |
| Fun1d | LDALVGD--VDAFVVFSS       | ISGI      | WGSAE         | Q   | A                         | A   | Y | G | A | A                         | AALDALIARRRASGLPGTAVAWGPW    | 168 |
| Fun1h | LDALVGD--VDAFVVFSS       | ISGI      | WGSAE         | Q   | T                         | A   | Y | G | A | A                         | AALDALIARRRASGLPGTAVAWGPW    | 168 |
| Fun1a | LDALVGD--VDAFVVFSS       | ISGV      | WGSRG         | Q   | A                         | A   | Y | G | A | A                         | AALDALVERRAAGRPGTAVAWGPW     | 168 |
| Fun12 | LDALVGD--VDAFVVFSS       | ISGV      | WGSGE         | Q   | A                         | A   | Y | G | A | A                         | AALDGLVARRRAGLPGTAVAWGPW     | 168 |
| Fun6b | LLDLLDPAHLEQVVLFS        | SNAGV     | WGSAR         | Q   | G                         | T   | Y | G | A | A                         | AALDALAEQARERGLPVTSAWGLW     | 175 |
| Fun3b | LDELLADTDLDAFVLFSS       | IAAT      | WGTR          | H   | P                         | A   | Y | A | A | A                         | ADAFDAFAGWRRAQGRPATAIAWSPW   | 175 |
| Fun4a | LDELGLDLDLDAFVLFSS       | IAAT      | WGTR          | H   | P                         | A   | Y | A | A | A                         | AGLDALAQRRRARGLAGTSLAWGPW    | 179 |
| Fun1i | LHELTRDLDSAFVLFSS        | ASAI      | FTPG          | Q   | A                         | Y   | A | A | A | A                         | ANAFLDALAQHRRALGLPGQALAWGPW  | 174 |
| Fun7a | LHEATAGADLDAFVLYSS       | VAGL      | FGTPG         | Q   | G                         | N   | Y | A | A | A                         | ANAFLDFAAAARRSRGLPGTSLAWGAW  | 174 |
| Fun5d | LRAATADRPLSAFVLFSS       | VAGL      | LSAG          | Q   | A                         | Y   | A | A | A | A                         | ANTFLDAYAARLRAEGVPATSLAWGLW  | 174 |
| Fun6a | LHAATADRPLAAFVLFSS       | AAGL      | GNAG          | Q   | A                         | Y   | A | A | A | A                         | ANTFTDAFAAFRAQGLPATSLAWGLW   | 164 |
| Fun7b | LRAATADHRLSAFVLYSS       | AAGL      | FNAG          | Q   | A                         | Y   | A | A | A | A                         | ANAFLDAYAAQLRAEGVPATSLAWGLW  | 170 |
| Fun4b | LAAATEDRPLSAFVLYSS       | ASGL      | FSAG          | Q   | A                         | Y   | A | A | A | A                         | ANAFLDAYATQLRAQGV PATSLAWGLW | 164 |
| Fun4c | LAAATKDRPLRAFVLYSS       | ASGL      | FNAG          | Q   | A                         | Y   | A | A | A | A                         | ANTFLDAYATRLRGEQVPATSLAWGLW  | 168 |
| Fun8a | LAAATKDRPLRAFVLYSS       | VAGI      | FGNPG         | Q   | A                         | Y   | A | A | A | A                         | ANAFLDAYATQLRAQGV PATSLAWGLW | 168 |
| Fun5c | LRAATADQPLTAFVLYSS       | VAGL      | FNAG          | Q   | A                         | Y   | A | A | A | A                         | ANAFLDAYATQLRGOQVPATSLAWGLW  | 164 |



|       |                                                                |     |
|-------|----------------------------------------------------------------|-----|
| Fun7c | LAAATADQPLTAFVLYSSAAGVFGNAGQANYAAANAFFLDAYATQLRGQGV PATSLAWGLW | 164 |
| Fun7d | LAAATADQPLAAFVLYSSAAGLFGNAGQANYAAANAFFLDAYATQLREQGV PATSLAWGLW | 168 |
| Fun5a | LVAATKDQPLTAFVLYSSAAGVFGNAGQANYAAANAFFLDAYATQLRGQGV PATSLAWGLW | 168 |
| Fun5b | LVAATKDQPLTAFVLYSSAAGLFGNAGQANYAAANAFFLDAYATQLHAQGI PATSLAWGLW | 168 |

**FIG S48:** Predicted stereochemical configurations of products for each polyketide synthase module in funisamine biosynthesis.

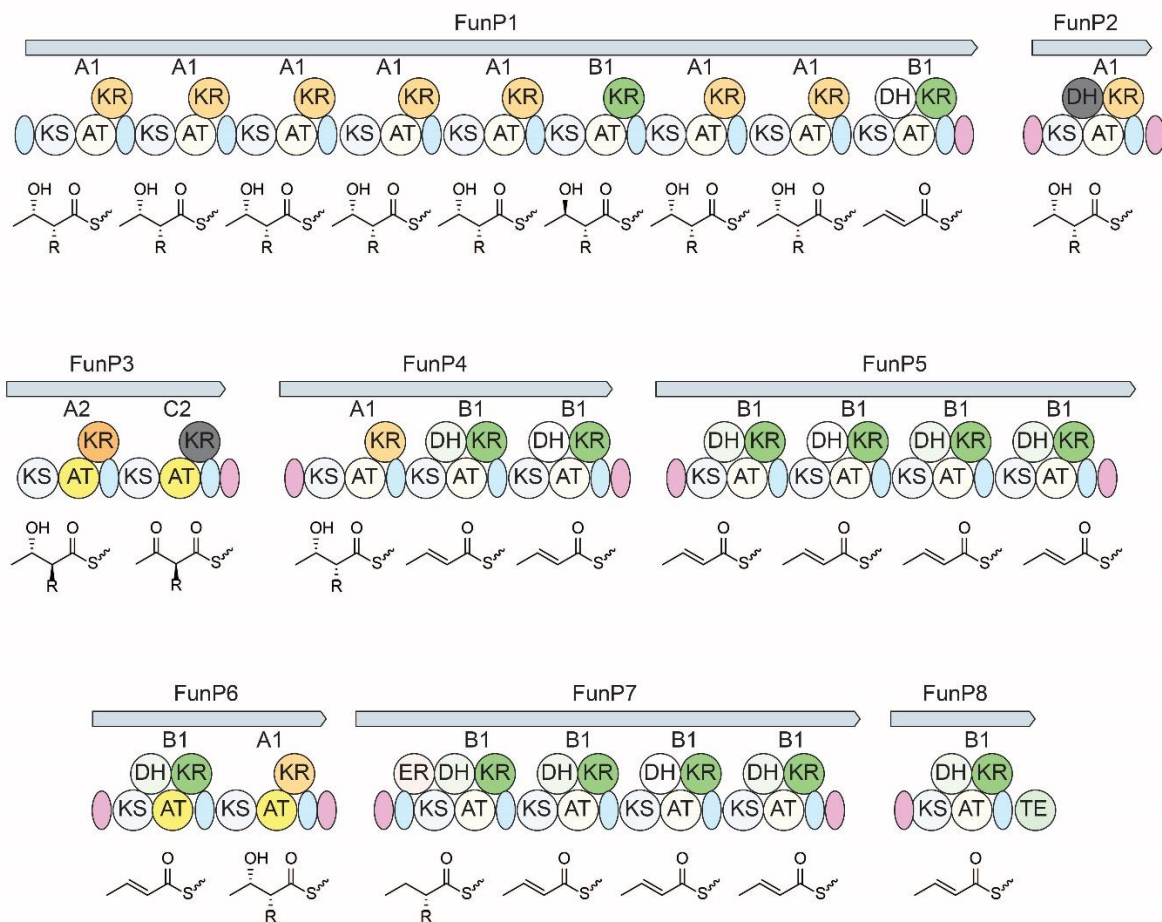

**FIG S49:** Expanded biosynthesis of funisamine from FunP1. The layout of catalytic domains: ketosynthase (KS), acyltransferase (AT), ketoreductase (KR), dehydratase (DH), enoylreductase (ER), and thioesterase (TE) present within the polyketide synthases are shown with inactive domains colored grey. A-type and B-type KR domains are colored orange and green respectively. Acyltransferase domains predicted to use methyl or propylmalonyl extender units are colored yellow. Acyl carrier proteins are colored light blue, and docking domains are purple.

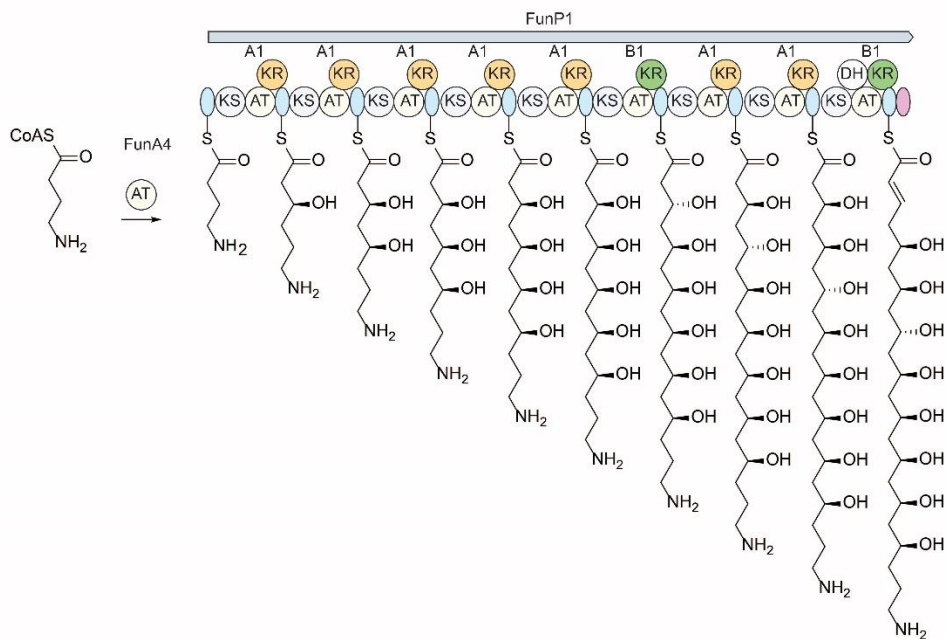

**FIG S50:** Expanded biosynthesis of funisamine from FunP2 - FunP4. The layout of catalytic domains: ketosynthase (KS), acyltransferase (AT), ketoreductase (KR), dehydratase (DH), enoylreductase (ER), and thioesterase (TE) present within the polyketide synthases are shown with inactive domains colored grey. A-type and B-type KR domains are colored orange and green respectively. Acyltransferase domains predicted to use methyl or propylmalonyl extender units are colored yellow. Acyl carrier proteins are colored light blue, and docking domains are purple.

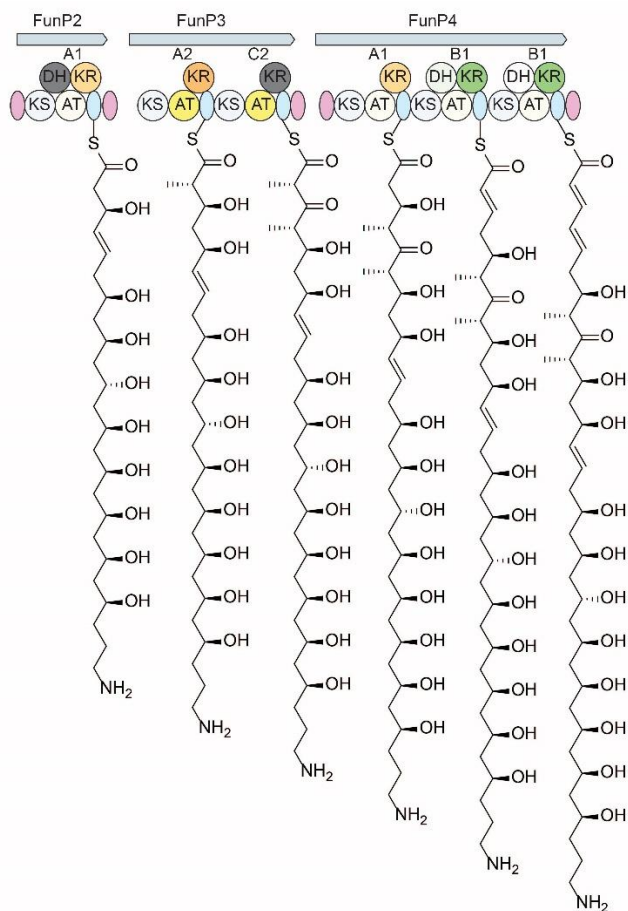

**FIG S51:** Expanded biosynthesis of funisamine from FunP5 - FunP8. The layout of catalytic domains: ketosynthase (KS), acyltransferase (AT), ketoreductase (KR), dehydratase (DH), enoylreductase (ER), and thioesterase (TE) present within the polyketide synthases are shown with inactive domains colored grey. A-type and B-type KR domains are colored orange and green respectively. Acyltransferase domains predicted to use methyl or propylmalonyl extender units are colored yellow. Acyl carrier proteins are colored light blue, and docking domains are purple.

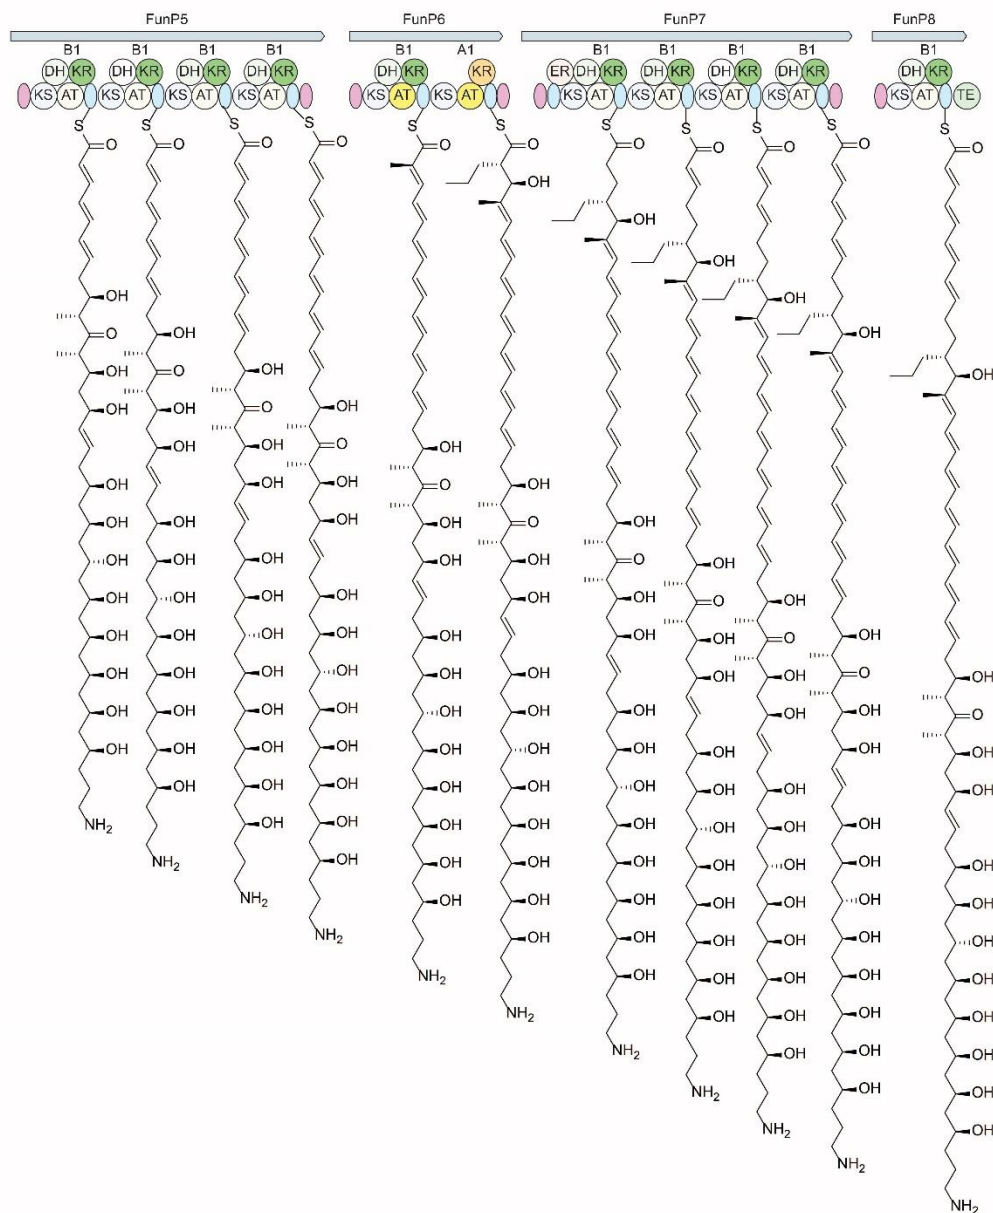

Supplement: zam019188756s1.pdf [file zam019188756s1.pdf]
